# Supplementary material for: Substituent effects on the electronic structure of the flat Blatter radical: correlation analysis of experimental and computational data
Source: Royal Society of Chemistry journal article supplement (doi:10.1039/d1nj05137g), 2021-01-01
Supplement: d1nj05137g1.pdf [file d1nj05137g1.pdf]

Electronic Supplementary Information for  
**Substituent effects on the electronic structure of the flat Blatter radical: Correlation analysis of experimental and computational data**

Paulina Bartos,<sup>†</sup> Aniket A. Hande,<sup>†,§</sup> Anna Pietrzak,<sup>¶</sup> Anna Chrostowska<sup>§</sup> and  
Piotr Kaszyński,<sup>†,d,e\*</sup>

<sup>†</sup> Faculty of Chemistry, University of Łódź, 91-403 Łódź, Poland

<sup>§</sup> Université de Pau et des Pays de l'Adour E2S UPPA, CNRS, IPREM 64000, Pau, France

<sup>¶</sup> Faculty of Chemistry, Łódź University of Technology, Żeromskiego 116, 90-024, Łódź, Poland

<sup>‡</sup> Centre of Molecular and Macromolecular Studies, Polish Academy of Sciences, 90-363 Łódź, Poland

<sup>⊥</sup> Department of Chemistry, Middle Tennessee State University, Murfreesboro, TN, 37132, USA

**Table of Content:**

|                                                                    |           |
|--------------------------------------------------------------------|-----------|
| 1. Additional synthetic details                                    | .....S2   |
| 2. NMR spectra                                                     | .....S5   |
| 3. XRD data collection and refinement                              | .....S16  |
| 4. Electronic absorption spectroscopy                              | .....S24  |
| 5. Electrochemical results                                         | .....S29  |
| 6. EPR spectra                                                     | .....S31  |
| 7. Computational details and results                               | .....S36  |
| <i>a) geometry optimization</i>                                    | .....S36  |
| <i>b) hfcc calculations</i>                                        | ....S39   |
| <i>c) spin delocalization</i>                                      | ....S43   |
| <i>d) N–H bond dissociation energy and resonance stabilization</i> | ....S43   |
| <i>e) oxidation potentials for radicals 1</i>                      | ....S44   |
| <i>f) electronic excitations</i>                                   | .....S48  |
| <i>g) partial output data for TD-DFT calculations</i>              | .....S51  |
| 8. Archive for DFT results                                         | .....S75  |
| 9. References                                                      | .....S109 |

## 1. Additional synthetic details

### *Preparation of intermediates*

**2-Amino-4-iodophenol.**<sup>1</sup> 2-Amino-4-iodophenol was obtained according to literature procedure.<sup>2</sup> Thus, to the solution of 4-iodo-2-nitrophenol (1.068 g, 4.0 mmol) in EtOH (20 mL), SnCl<sub>2</sub> (4.513 g, 20 mmol) was added in one portion and the reaction mixture was stirred for 1.5 hr at 70 °C under ambient atmosphere. The reaction mixture was poured into sat. NaHCO<sub>3</sub> (100 mL), filtered through Celite, which was washed well with EtOAc. The organic layer was separated, washed with H<sub>2</sub>O (2×30 mL) and dried (Na<sub>2</sub>SO<sub>4</sub>). The solvent was removed under vacuum to give 760 mg (3.2 mmol) of 4-iodo-2-aminophenol as brownish solid, which was used for the next step without further purification: mp 126–128 °C (lit.<sup>1</sup> mp 139 °C); <sup>1</sup>H NMR (600 MHz, DMSO-*d*<sub>6</sub>) δ 9.27 (bs, 1H), 6.87 (d, *J* = 2.1 Hz, 1H), 6.65 (dd, *J*<sub>1</sub> = 8.2 Hz, *J*<sub>2</sub> = 2.1 Hz, 1H), 6.43 (d, *J* = 8.2 Hz, 1H), 4.74 (bs, 2H); <sup>13</sup>C NMR (151 MHz, DMSO-*d*<sub>6</sub>) δ 143.0, 139.2, 124.3, 121.8, 116.4, 81.7; IR (ATR) ν 3381, 3207, 3191, 1581, 1492, 1443, 1257, 1198, 905, 853, 769 cm<sup>-1</sup>; HRMS (ESI-TOF) [M+H]<sup>+</sup> *m/z* calcd for C<sub>6</sub>H<sub>7</sub>INO: 235.9572; found: 235.9574. Anal. Calcd for C<sub>6</sub>H<sub>6</sub>INO: C, 30.66; H, 2.57; N, 5.96. Found C, 30.71; H, 2.52; N, 6.03.

**2-Amino-4-benzyloxyphenol.**<sup>3</sup> The phenol was obtained in 69% yield as grey powder by reduction of 4-benzyloxy-2-nitrophenol with Zn in AcOH according to a literature procedure<sup>3</sup> and used in the next step without further purification: <sup>1</sup>H NMR (600 MHz, DMSO-*d*<sub>6</sub>) δ 8.50 (s, 1H), 7.39 (d, *J* = 7.2 Hz, 2H), 7.37 (t, *J* = 7.4 Hz, 2H), 7.30 (t, *J* = 6.7 Hz, 1H), 6.50 (d, *J* = 8.6 Hz, 1H), 6.27 (d, *J* = 2.8 Hz, 1H), 6.03 (dd, *J*<sub>1</sub> = 8.5 Hz, *J*<sub>2</sub> = 2.8 Hz, 1H), 4.90 (s, 2H), 4.54 (bs, 2H); IR (KBr) ν 3384, 3293, 1521, 1233, 1182, 1017, 734, 695 cm<sup>-1</sup>; HRMS (ESI-TOF) [M+H]<sup>+</sup> *m/z* calcd for C<sub>13</sub>H<sub>14</sub>NO<sub>2</sub>: 216.1025; found: 216.1026.

**3-Amino-4-hydroxyphenyl acetate.** It was obtained in 87% yield as a brown solid by catalytic reduction of 4-hydroxy-3-nitrophenyl acetate in a THF–EtOH mixture (1:1) at ambient temperature in the presence of 10% Pd/C at 2 bars and used to the next step without further purification: <sup>1</sup>H NMR (600 MHz, DMSO-*d*<sub>6</sub>) δ 9.01 (s, 1H), 6.57 (d, *J* = 8.3 Hz, 1H), 6.29 (d, *J* = 2.3 Hz, 1H), 6.08 (dd, *J*<sub>1</sub> = 8.3 Hz, *J*<sub>2</sub> = 2.3 Hz, 1H), 4.68 (bs, 2H), 2.17 (s, 3H); <sup>13</sup>C {<sup>1</sup>H} NMR (151 MHz, DMSO-*d*<sub>6</sub>) δ 169.5, 143.4, 141.5, 137.4, 113.9, 108.2, 107.4, 20.8; IR (KBr) ν

3384, 3293, 1601, 1521, 1233, 1183, 1017, 794, 734, 695  $\text{cm}^{-1}$ . Anal. Calcd for  $\text{C}_8\text{H}_9\text{NO}_3$ : C, 57.48; H, 5.43; N, 8.38. Found C, 57.49; H, 5.72; N, 8.17.

**4-Iodo-2-nitrophenol.**<sup>4</sup> 4-Iodo-2-nitrophenol was obtained according to a literature procedure.<sup>5</sup> Thus,  $\text{NaNO}_2$  (4.56 g, 66.0 mmol) dissolved in  $\text{H}_2\text{O}$  (24 mL) was added dropwise to a suspension of 4-amino-2-nitrophenol (9.25 g, 60 mmol) in 32 mL conc.  $\text{HCl}$  (32 mL) at 0  $^\circ\text{C}$ . After 20 min of stirring,  $\text{KI}$  (100 g, 600 mmol) dissolved in  $\text{H}_2\text{O}$  (140 mL) was added and the reaction mixture, which was allowed to warm up to room temperature. The stirring was continued for 12 hrs.  $\text{H}_2\text{O}$  (200 mL) was added to the reaction mixture and the resulting mixture was extracted with  $\text{EtOAc}$  ( $3 \times 100$  mL). The organic extracts were dried ( $\text{Na}_2\text{SO}_4$ ) and concentrated under vacuum to give crude product which was purified by column chromatography ( $\text{SiO}_2$ , pet. ether/ $\text{CH}_2\text{Cl}_2$  1:1), giving 9.82 g (62% yield) of the phenol as yellow crystals: mp 78–79  $^\circ\text{C}$  (lit.<sup>4</sup> mp 81  $^\circ\text{C}$ );  $^1\text{H}$  NMR (600 MHz,  $\text{DMSO}-d_6$ )  $\delta$  11.3 (bs, 1H), 8.12 (d,  $J = 2.1$  Hz, 1H), 7.80 (dd,  $J_1 = 8.7$  Hz,  $J_2 = 2.1$  Hz, 1H), 6.94 (d,  $J = 8.7$  Hz, 1H);  $^{13}\text{C}\{^1\text{H}\}$  NMR (151 MHz,  $\text{DMSO}-d_6$ )  $\delta$  152.1, 143.5, 138.7, 133.2, 121.8, 80.4; IR (ATR)  $\nu$  1605, 1567, 1513, 1465, 1404, 1228, 1158, 831, 655, 610, 538  $\text{cm}^{-1}$ ; HRMS (ESI-TOF)  $[\text{M}-\text{H}]^+$   $m/z$  calcd for  $\text{C}_6\text{H}_3\text{INO}_3$  263.9158; found: 263.9158. Anal. Calcd for  $\text{C}_6\text{H}_4\text{INO}_3$ : C, 27.19; H, 1.52; N, 5.29. Found C, 27.15; H, 1.46; N, 15.31.

**4-Benzyloxy-2-nitrophenol.**<sup>6</sup> It was obtained as yellow crystals in 85% yield by selective debenylation of 1,4-dibenzyloxy-2-nitrobenzene with TFA in  $\text{CH}_2\text{Cl}_2$  according to a literature procedure:<sup>7</sup> mp 65–66  $^\circ\text{C}$  ( $\text{EtOH}$ , lit.<sup>6</sup> mp 68–70);  $^1\text{H}$  NMR (600 MHz,  $\text{DMSO}-d_6$ )  $\delta$  10.35 (s, 1H), 7.60 (d,  $J = 3.1$  Hz, 1H), 7.43 (t,  $J = 6.8$  Hz, 2H), 7.40 (t,  $J = 7.4$  Hz, 2H), 7.34 (t,  $J = 7.0$  Hz, 1H), 7.29 (dd,  $J_1 = 9.2$  Hz,  $J_2 = 3.1$  Hz, 1H), 7.09 (d,  $J = 9.2$  Hz, 1H), 5.06 (s, 2H);  $^{13}\text{C}\{^1\text{H}\}$  NMR (151 MHz,  $\text{DMSO}-d_6$ )  $\delta$  151.7, 150.3, 136.0, 133.1, 128.9, 128.5, 128.0, 127.8, 121.0, 107.3, 71.0; IR (KBr)  $\nu$  3235, 1537, 1485, 1431, 1330, 1248, 1022, 747, 700  $\text{cm}^{-1}$ ; HRMS (ESI-TOF)  $[\text{M}-2\text{H}]^-$   $m/z$  calcd for  $\text{C}_{13}\text{H}_9\text{NO}_4$ : 243.0532; found: 243.0534. Anal. Calcd for  $\text{C}_{13}\text{H}_{11}\text{NO}_4$ : C, 63.67; H, 4.52; N, 5.71. Found C, 63.73; H, 4.76; N, 5.45.

**4-Hydroxy-3-nitrophenyl acetate.**<sup>8</sup> It was obtained as yellow crystals in 53% yield by nitration of 4-acetoxyphenol<sup>9</sup> with  $\text{HNO}_3$  in  $\text{AcOH}$  according to a literature procedure:<sup>9</sup> mp 79–80  $^\circ\text{C}$

(MeOH, lit.<sup>8</sup> mp 84 °C); <sup>1</sup>H NMR (600 MHz, DMSO-*d*<sub>6</sub>) δ 7.74 (s, 1H), 7.36 (d, *J* = 8.8 Hz, 1H), 7.16 (d, *J* = 8.8 Hz, 1H), 2.27 (s, 3H); <sup>13</sup>C{<sup>1</sup>H} NMR (151 MHz, DMSO-*d*<sub>6</sub>) δ 169.3, 149.8, 141.6, 136.2, 129.1, 119.6, 118.2, 20.7; IR (KBr) ν 3301, 1757, 1537, 1430, 1196, 950, 915 cm<sup>-1</sup>. Anal. Calcd for C<sub>8</sub>H<sub>7</sub>NO<sub>5</sub>: C, 48.74; H, 3.58; N, 7.10. Found C, 48.51; H, 3.63; N, 7.22.

**1,4-Dibenzyloxy-2-nitrobenzene.**<sup>10</sup> It was obtained as yellow crystals in 94% yield by nitration of 1,4-di(benzyloxy)benzene with conc. HNO<sub>3</sub> in AcOH according to a literature procedure:<sup>7</sup> mp 77–78 °C (MeOH; lit.<sup>10</sup> mp 80–81 °C); <sup>1</sup>H NMR (600 MHz, DMSO-*d*<sub>6</sub>) δ 7.49 (d, *J* = 3.0 Hz, 1H), 7.45 (d, *J* = 7.4 Hz, 2H), 7.37–7.42 (m, 6H), 7.31–7.36 (m, 2H), 7.13 (dd, *J*<sub>1</sub> = 9.1 Hz, *J*<sub>2</sub> = 3.0 Hz, 1H), 7.05 (d, *J* = 9.1 Hz, 1H), 5.18 (s, 2H), 5.05 (s, 2H); <sup>13</sup>C{<sup>1</sup>H} NMR (151 MHz, DMSO-*d*<sub>6</sub>) δ 152.4, 146.5, 140.4, 136.1, 136.0, 128.9, 128.8, 128.5, 128.3, 127.7, 127.3, 121.6, 117.4, 111.3, 72.2, 71.1; IR (KBr) ν 1522, 1451, 1386, 1341, 1227, 1016, 756, 733, 694 cm<sup>-1</sup>; HRMS (ESI-TOF) [M+Na]<sup>+</sup> *m/z* calcd for C<sub>20</sub>H<sub>17</sub>NO<sub>4</sub>Na: 358.1055; found: 358.1051. Anal. Calcd for C<sub>20</sub>H<sub>17</sub>NO<sub>4</sub>: C, 71.63; H, 5.11; N, 4.18. Found C, 71.60; H, 5.06; N, 4.32.

**1,4-Di(benzyloxy)benzene.**<sup>10</sup> It was obtained in 47% yield as yellow crystals by benzylation of hydroquinone with benzyl bromide in DMF according to a literature procedure:<sup>7</sup> mp 127–128 °C (EtOH) (lit.<sup>10</sup> mp 127–128 °C); <sup>1</sup>H NMR (600 MHz, DMSO-*d*<sub>6</sub>) δ 7.43 (d, *J* = 7.4 Hz, 4H), 7.39 (t, *J* = 7.5 Hz, 4H), 7.32 (t, *J* = 7.2 Hz, 2H), 6.91 (s, 4H), 5.02 (s, 4H); <sup>13</sup>C{<sup>1</sup>H} NMR (151 MHz, DMSO-*d*<sub>6</sub>) δ 153.3, 137.4, 128.7, 128.0, 127.6, 115.9, 70.8; IR (KBr) ν 2902, 1509, 1238, 1018, 813, 733, 696 cm<sup>-1</sup>; HRMS (ESI-TOF) [M]<sup>+</sup> *m/z* calcd for C<sub>20</sub>H<sub>18</sub>O<sub>2</sub>: 290.1307; found: 290.1312. Anal. Calcd for C<sub>20</sub>H<sub>18</sub>O<sub>2</sub>: C, 82.73; H, 6.27. Found C, 82.78; H, 6.28.



## 2. NMR spectra

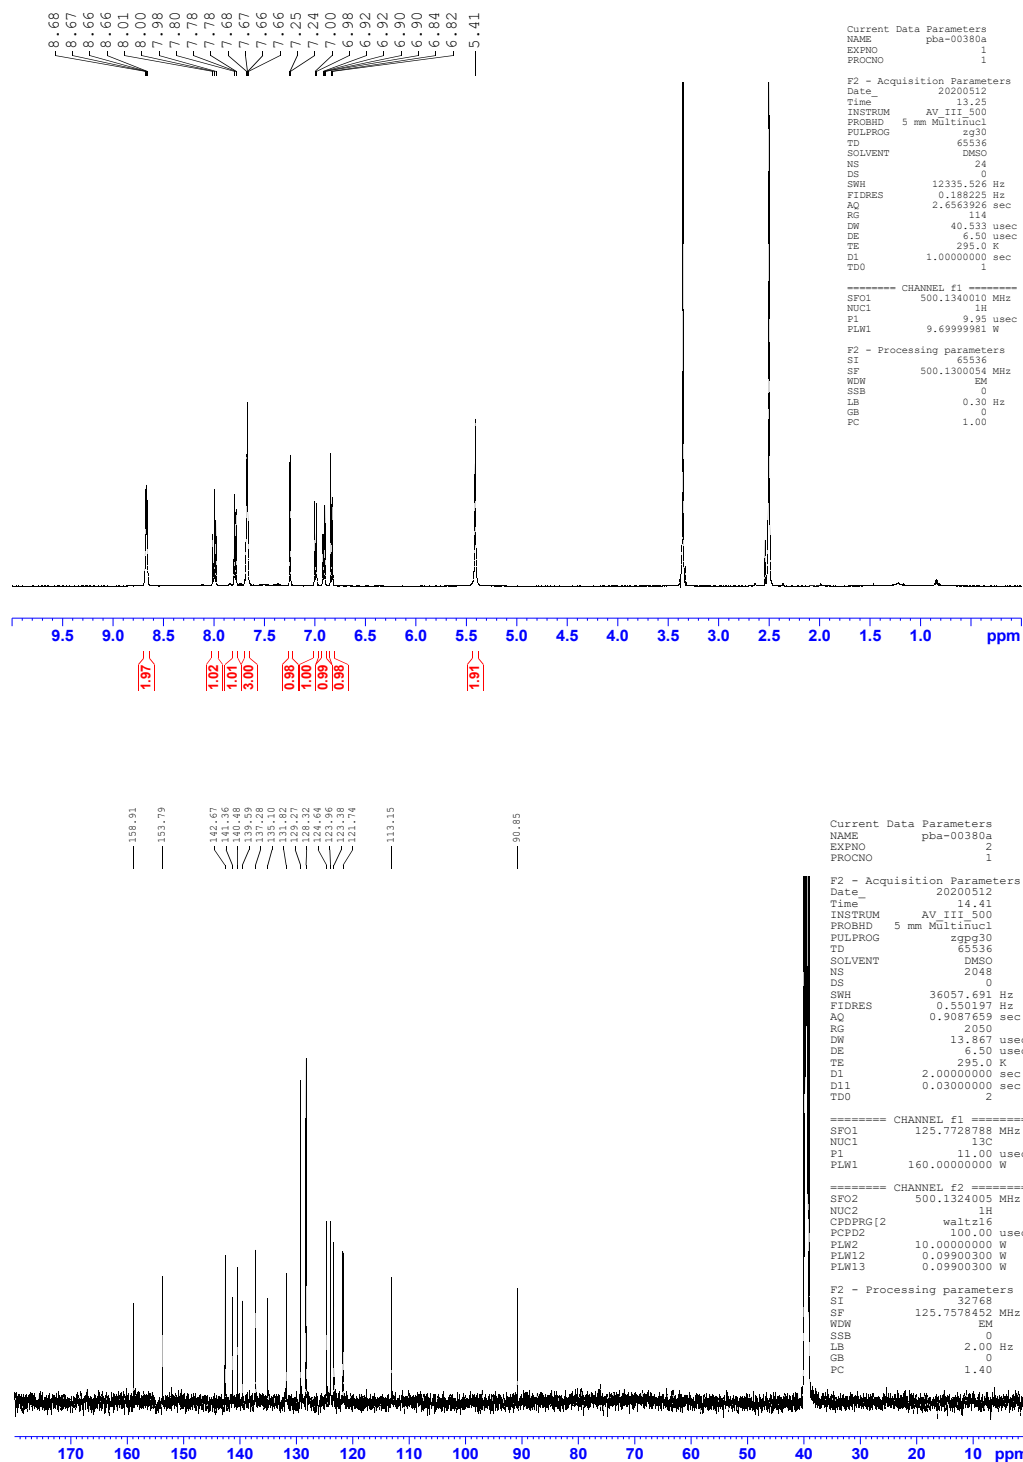

**Figure S1.** <sup>1</sup>H and <sup>13</sup>C{<sup>1</sup>H} NMR spectra for 8-(2-amino-4-iodo-1-phenyloxy)-3-phenylbenzo[*e*][1,2,4]triazine (**2n**) recorded in DMSO-*d*<sub>6</sub> at 500 and 125 MHz, respectively.

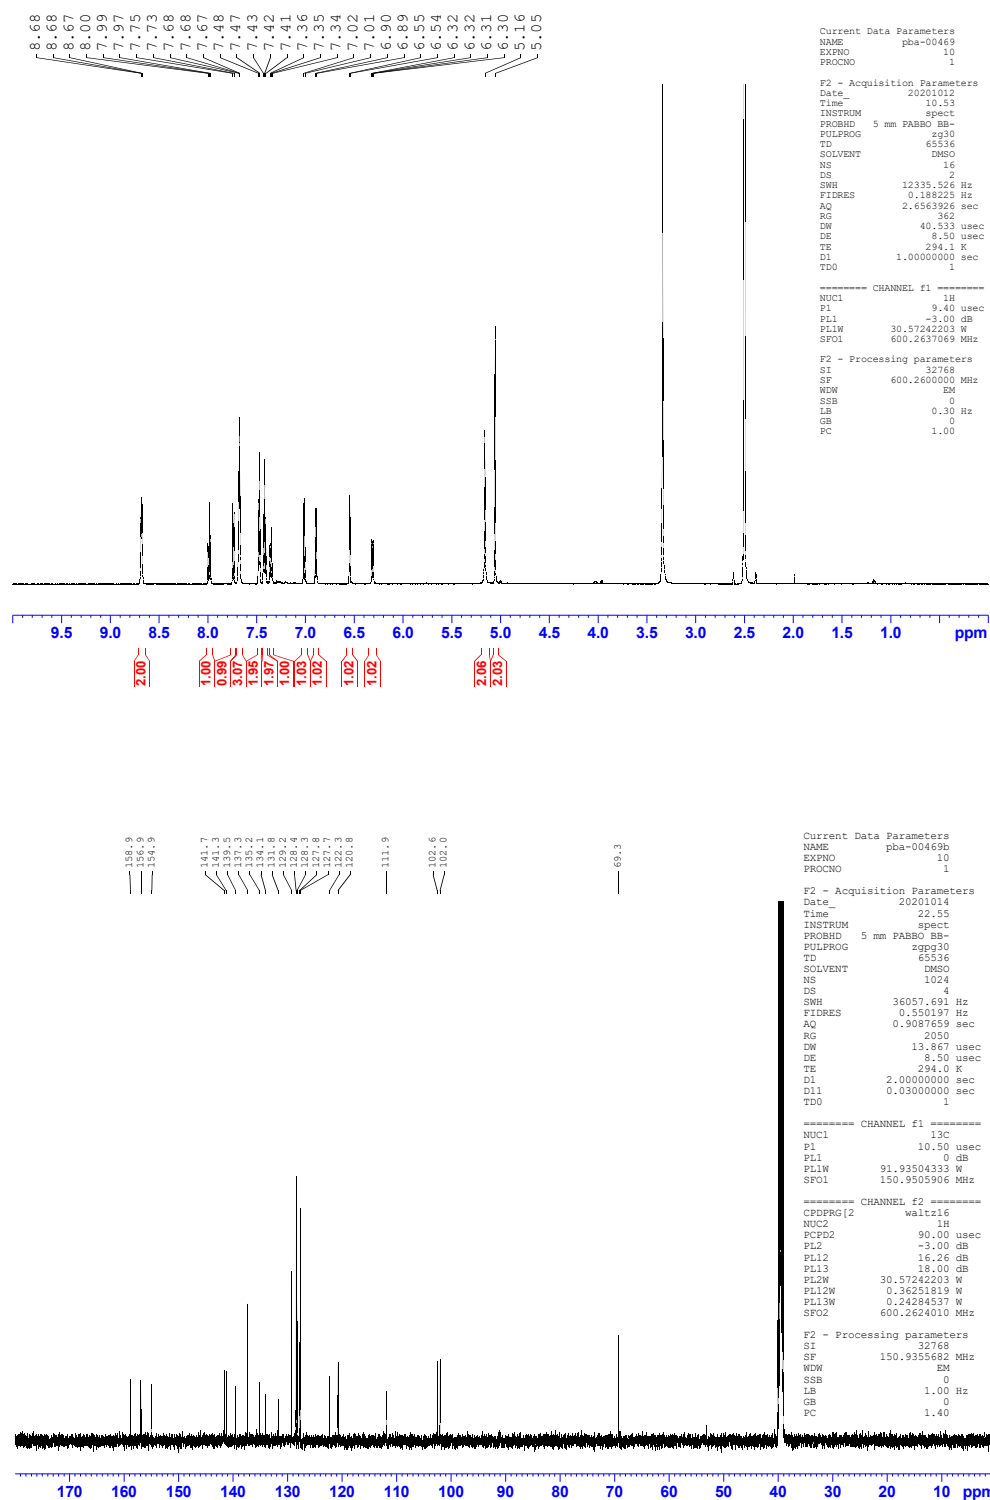

**Figure S2.** <sup>1</sup>H and <sup>13</sup>C{<sup>1</sup>H} NMR spectra for 8-(2-amino-4-benzyloxy-1-phenyloxy)-3-phenylbenzo[e][1,2,4]triazine (**2p**) recorded in DMSO-*d*<sub>6</sub> at 600 and 151 MHz, respectively.

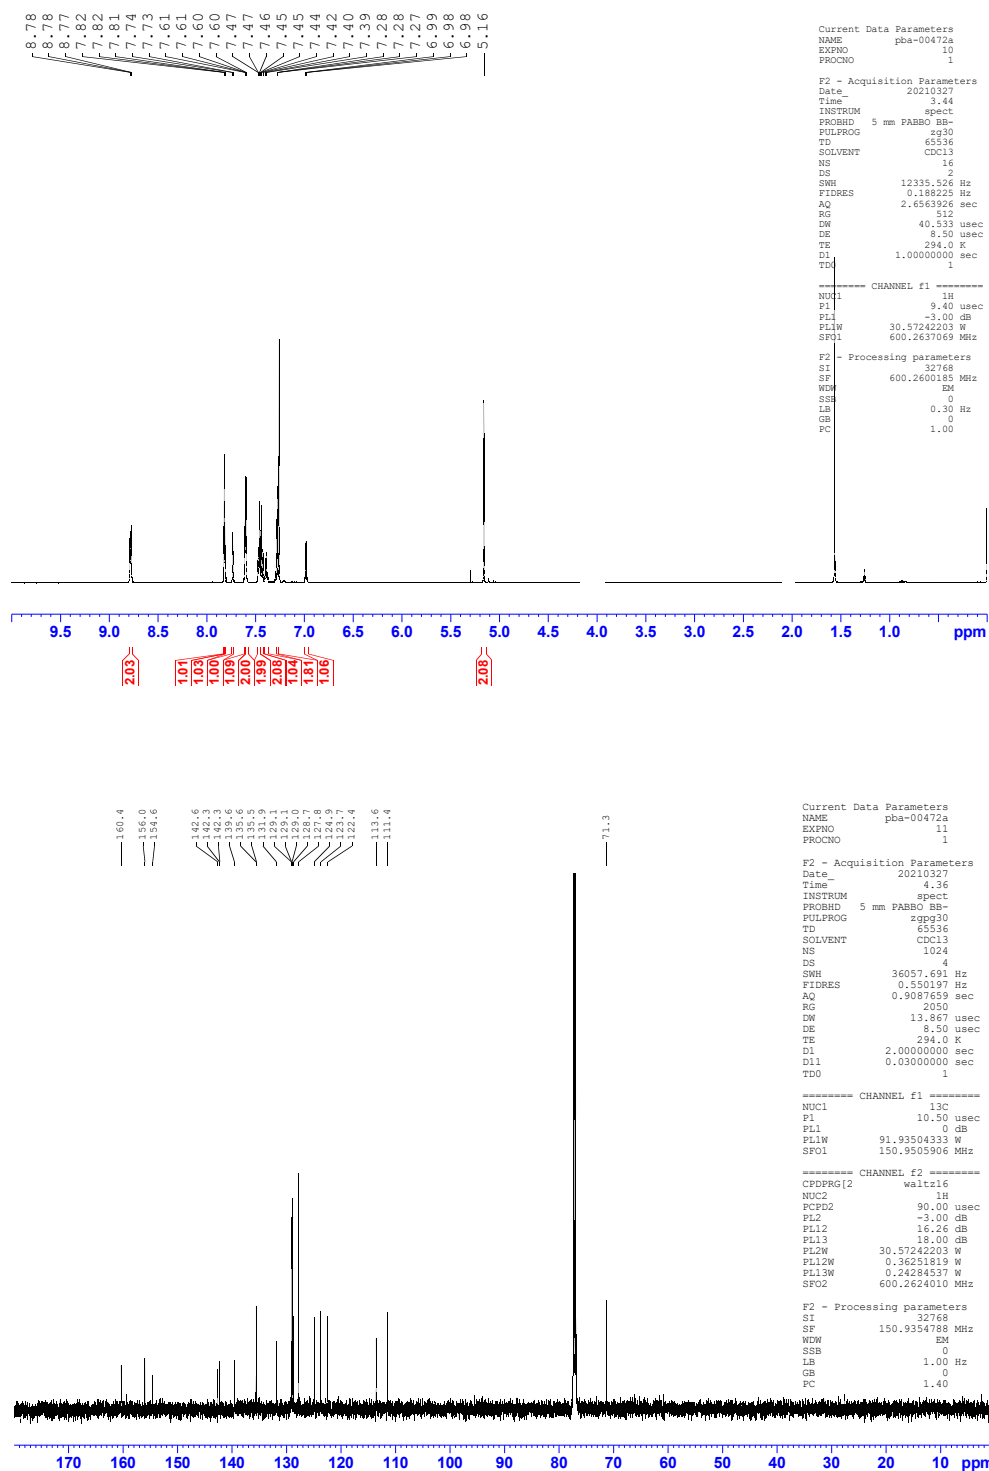

**Figure S3.** <sup>1</sup>H and <sup>13</sup>C{<sup>1</sup>H} NMR spectra for 8-(2-nitro-4-benzyloxy-1-phenyloxy)-3-phenylbenzo[e][1,2,4]triazine (**5p**) recorded in CDCl<sub>3</sub> at 600 and 151 MHz, respectively.

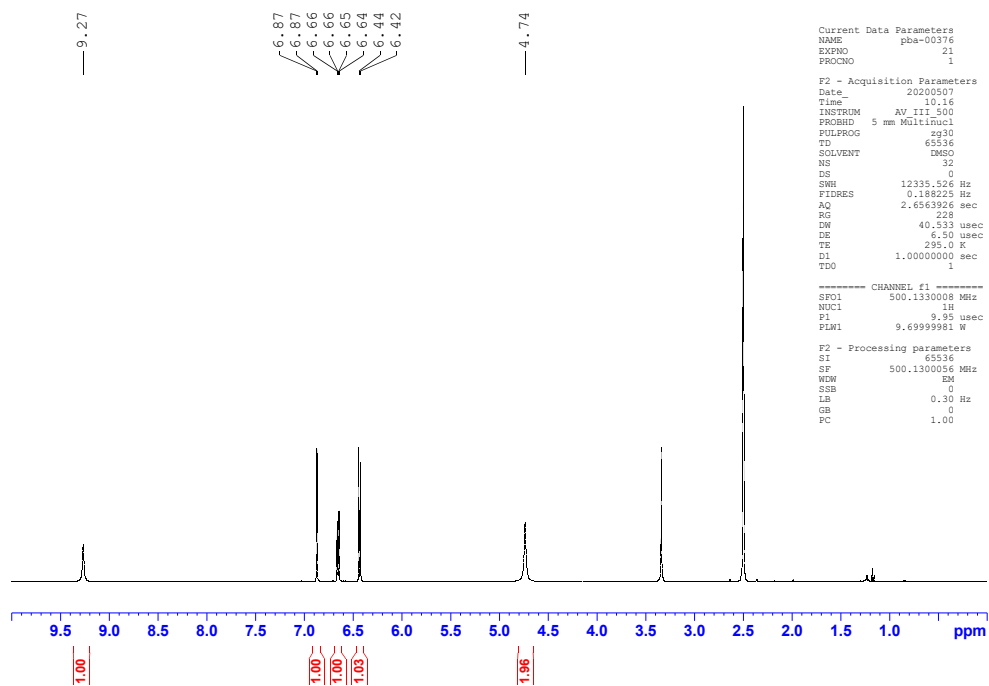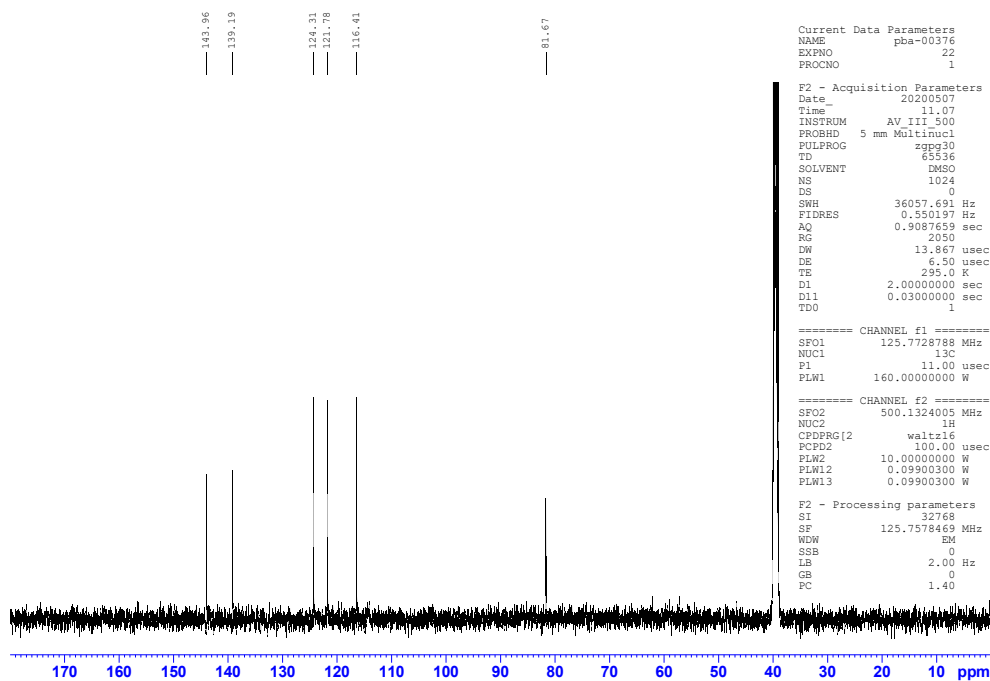

**Figure S4.**  $^1\text{H}$  and  $^{13}\text{C}\{^1\text{H}\}$  NMR spectra for 2-amino-4-iodophenol recorded in DMSO-*d*<sub>6</sub> at 500 and 125 MHz, respectively.

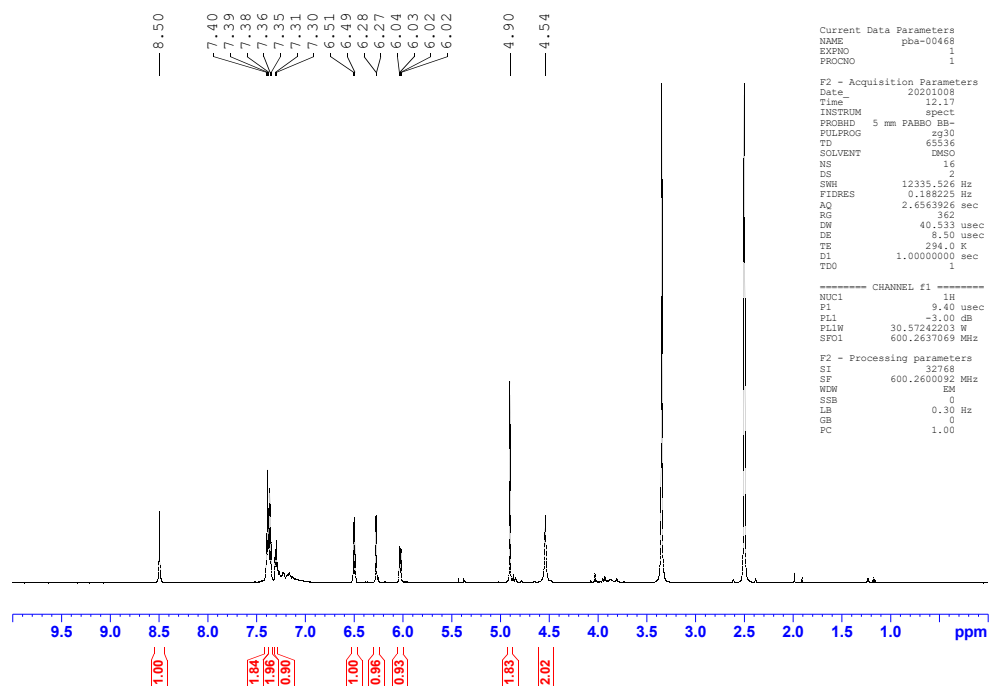

**Figure S5.**  $^1\text{H}$  NMR spectrum for 2-amino-4-benzyloxyphenol recorded in  $\text{DMSO-}d_6$  at 600 MHz.

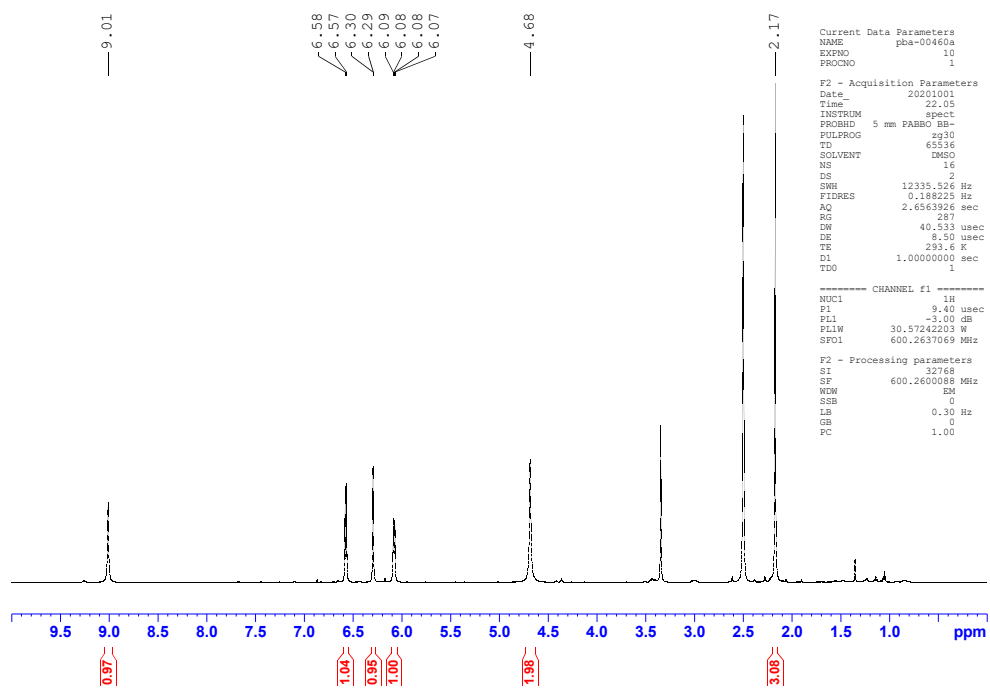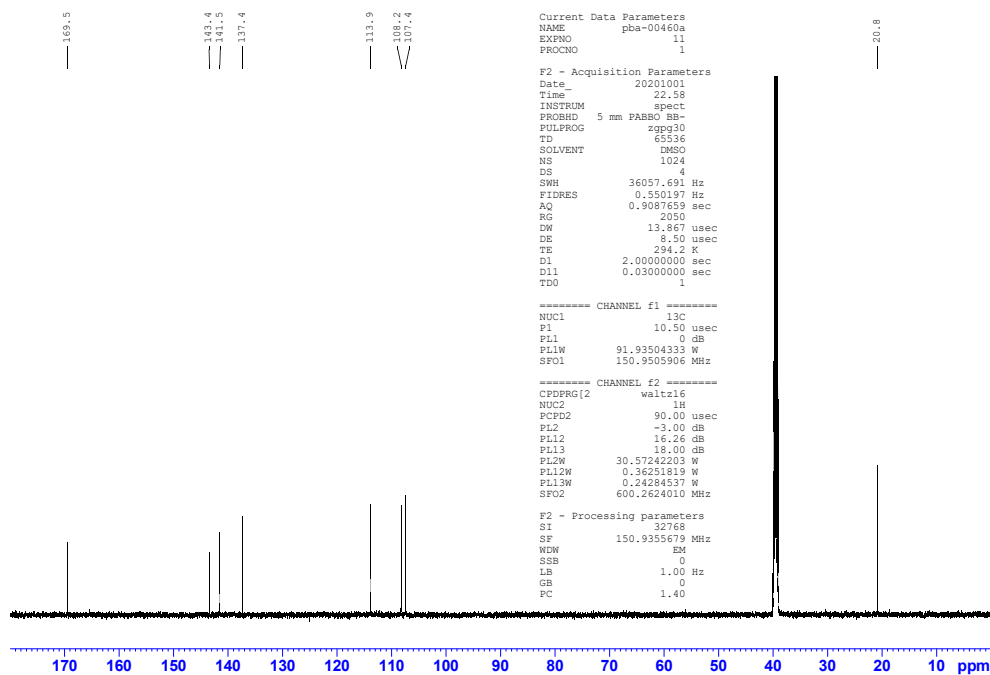

**Figure S6.**  $^1\text{H}$  and  $^{13}\text{C}\{^1\text{H}\}$  NMR spectra for 3-amino-4-hydroxyphenyl acetate recorded in  $\text{DMSO-}d_6$  at 600 and 151 MHz, respectively.

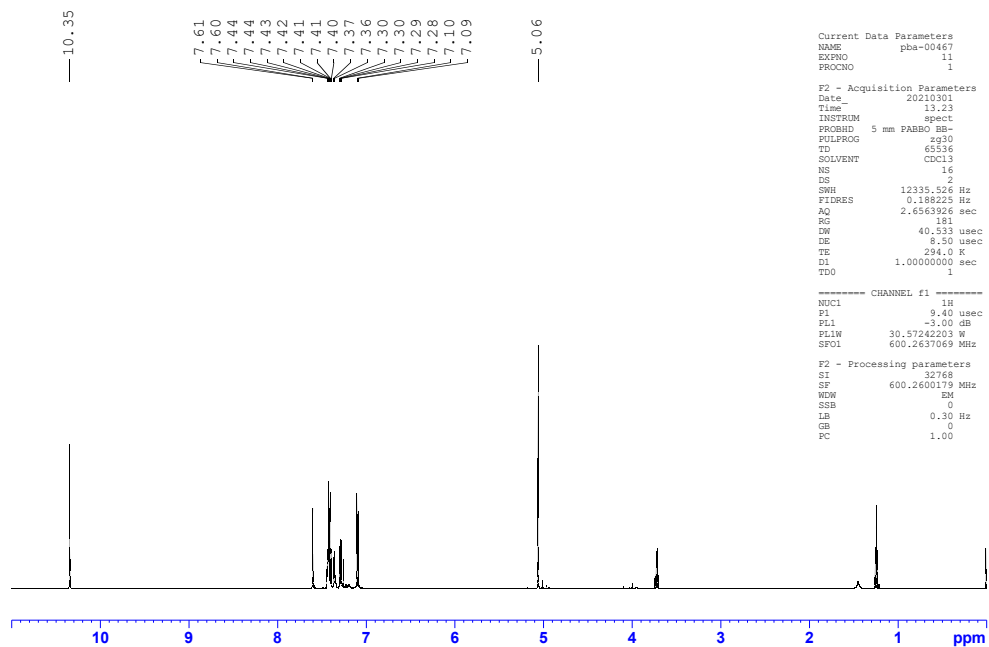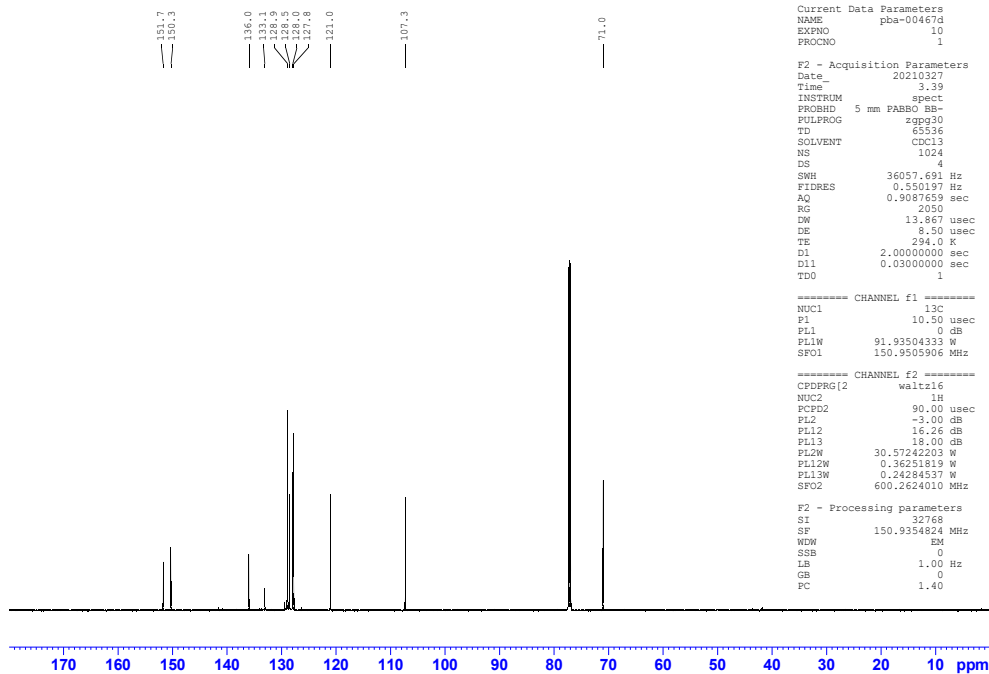

**Figure S7.**  $^1\text{H}$  and  $^{13}\text{C}\{^1\text{H}\}$  NMR spectra for 4-benzyloxy-2-nitrophenol recorded in  $\text{DMSO-}d_6$  at 600 and 151 MHz, respectively.

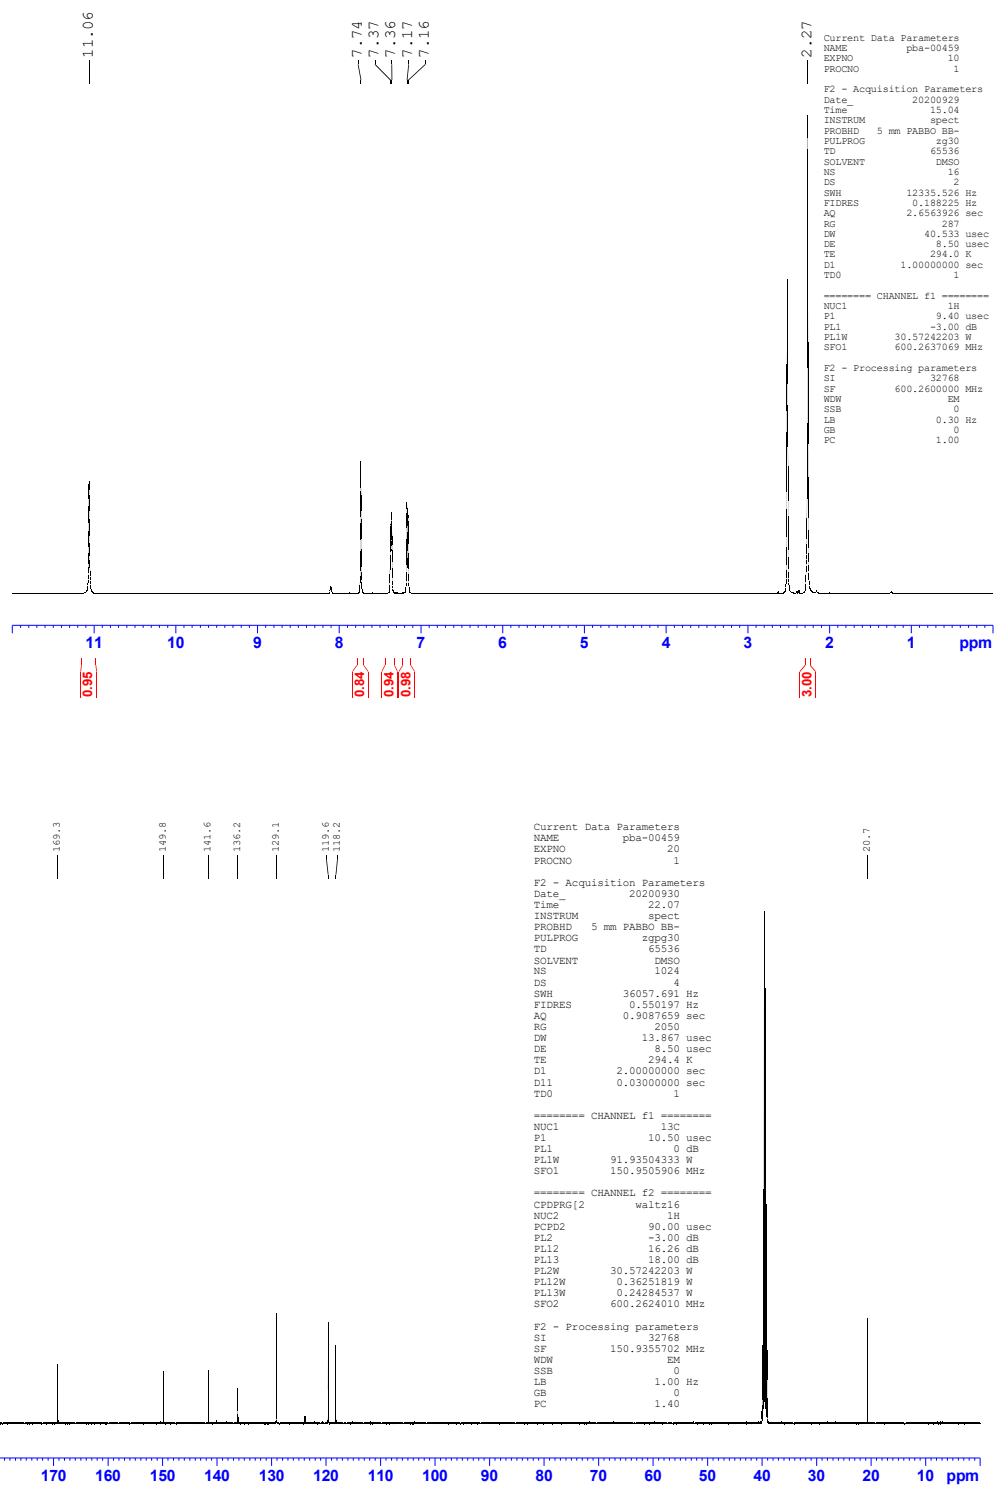

**Figure S8.** <sup>1</sup>H and <sup>13</sup>C{<sup>1</sup>H} NMR spectra for 4-hydroxy-3-nitrophenyl acetate recorded in DMSO-*d*<sub>6</sub> at 600 and 151 MHz, respectively.



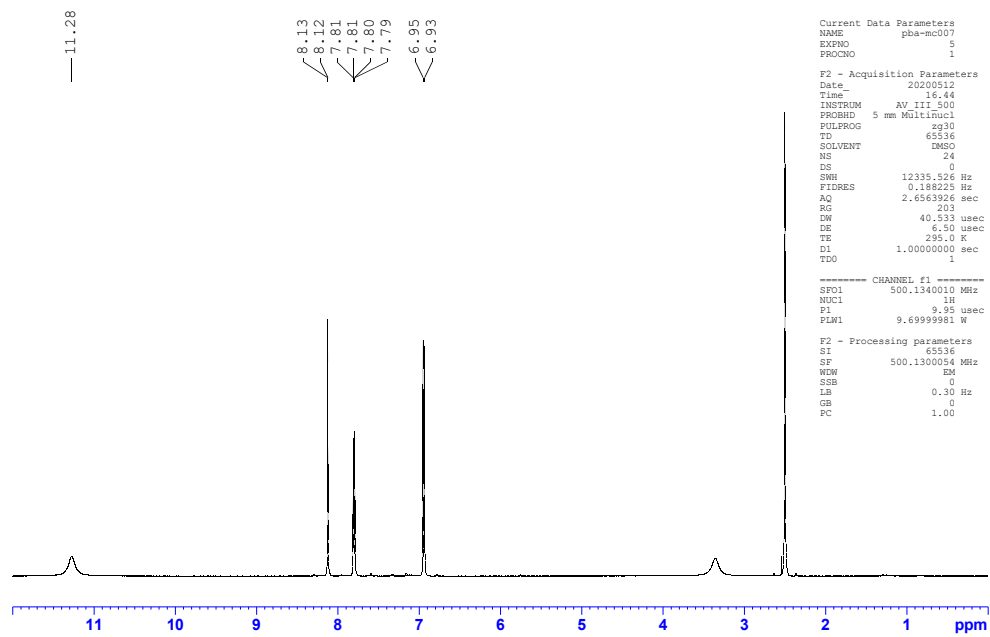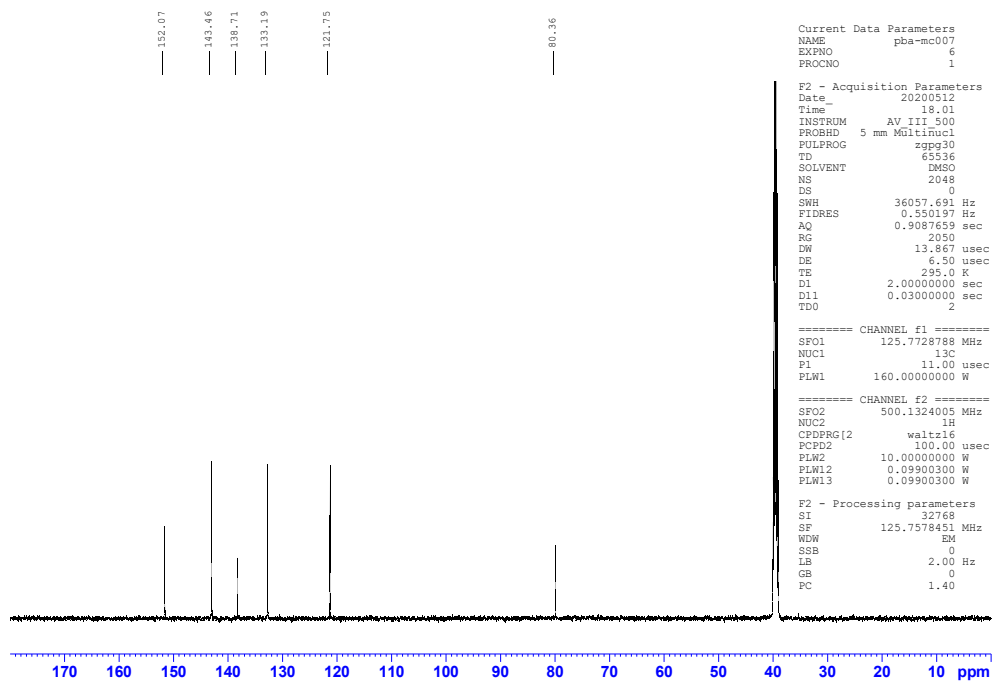

**Figure S9.**  $^1\text{H}$  and  $^{13}\text{C}\{^1\text{H}\}$  NMR spectra for 4-iodo-2-nitrophenol recorded in  $\text{DMSO-}d_6$  at 500 and 125 MHz, respectively.

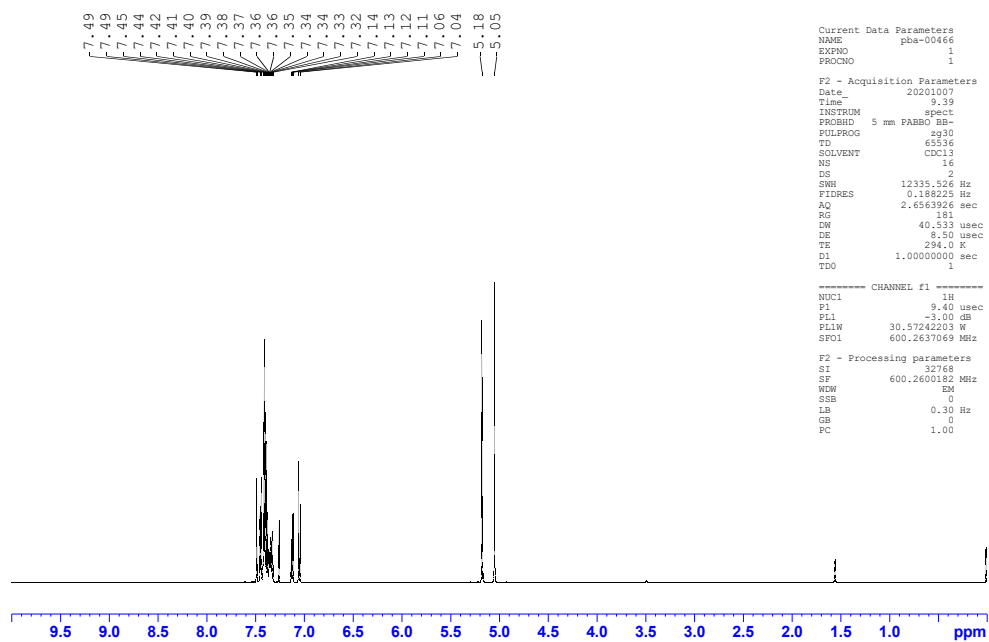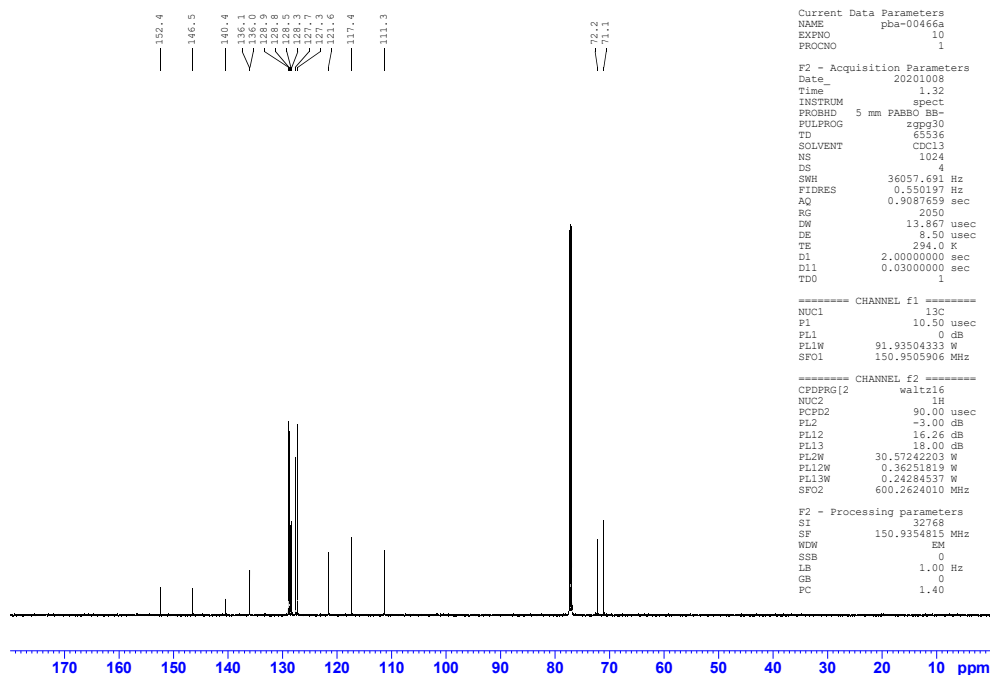

**Figure S10.**  $^1\text{H}$  and  $^{13}\text{C}\{^1\text{H}\}$  NMR spectra for 2-nitrohydroquinone dibenzyl ether recorded in  $\text{DMSO-}d_6$  at 600 and 151 MHz, respectively.

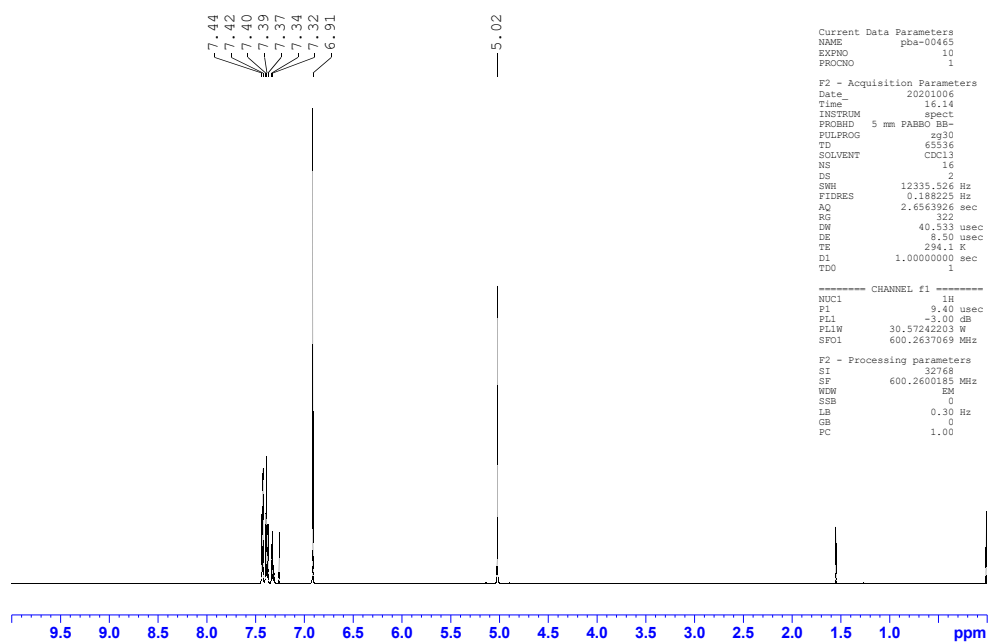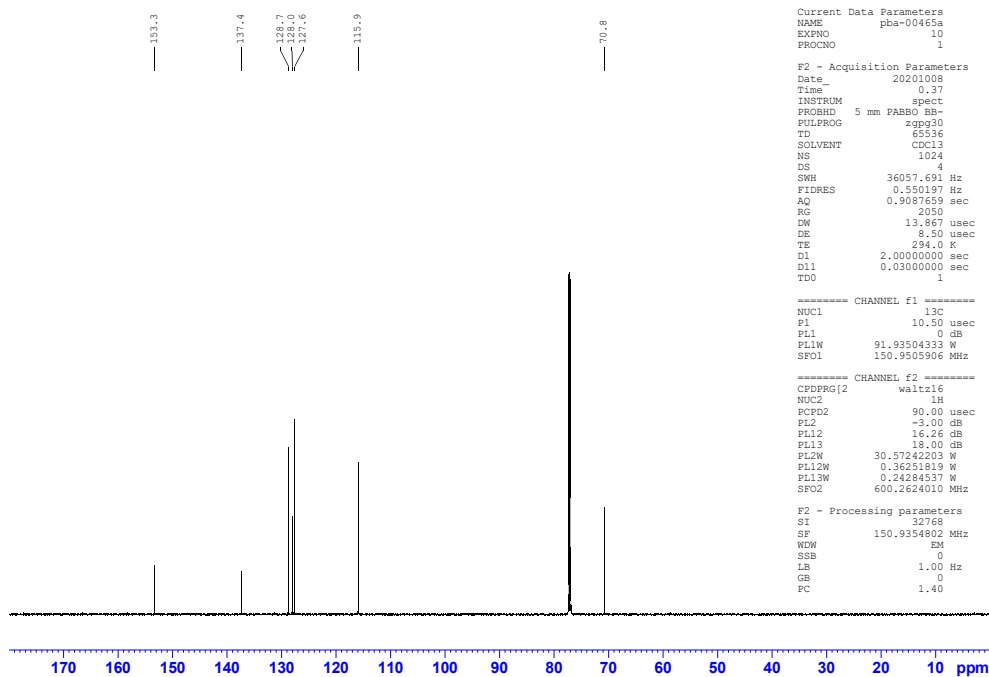

**Figure S11.**  $^1\text{H}$  and  $^{13}\text{C}\{^1\text{H}\}$  NMR spectra for 1,4-di(benzyloxy)benzene recorded in  $\text{DMSO}-d_6$  at 600 and 151 MHz, respectively.

### 3. XRD data collection and refinement

Single-crystal XRD measurements for **1n**, **1q**, and **1s** were performed with a Rigaku XtalAB Synergy, Pilatus 300K diffractometer. The measurements were conducted at 100.0(1) K using the CuK $_{\alpha}$  radiation ( $\lambda=1.54184$  Å). The data was integrated using CrysAlisPro program.<sup>11</sup> Intensities for absorption were corrected using multi-scan method as in SCALE3 ABSPACK scaling algorithm implemented in CrysAlisPro program.<sup>11</sup> Additional crystal and refinement information are listed in Table S1.

CCDC: Files 2007763-2007765 contain the supplementary crystallographic data for this paper. These data can be obtained free of charge from The Cambridge Crystallographic Data Centre via [www.ccdc.cam.ac.uk/structures](http://www.ccdc.cam.ac.uk/structures).

**Table S1. Selected structural data for 1n, 1q and 1s**

|                                                                                              | <b>1n</b>                                                      | <b>1q</b>                                                      | <b>1s</b>                                                     |
|----------------------------------------------------------------------------------------------|----------------------------------------------------------------|----------------------------------------------------------------|---------------------------------------------------------------|
|                                                                                              | CCDC: 2007765                                                  | CCDC: 2007764                                                  | CCDC: 2007763                                                 |
| Formula                                                                                      | C <sub>19</sub> H <sub>11</sub> IN <sub>3</sub> O              | C <sub>25</sub> H <sub>16</sub> N <sub>3</sub> O               | C <sub>27</sub> H <sub>16</sub> N <sub>3</sub> O              |
| Formula Weight                                                                               | 424.21                                                         | 374.41                                                         | 398.43                                                        |
| Crystal System                                                                               | Orthorhombic                                                   | Monoclinic                                                     | Monoclinic                                                    |
| Space Group                                                                                  | <i>Pccn</i>                                                    | <i>P2<sub>1</sub>/c</i>                                        | <i>P2<sub>1</sub>/c</i>                                       |
| <i>a</i> /Å                                                                                  | 28.8753(2)                                                     | 21.5515(6)                                                     | 18.3724(7)                                                    |
| <i>b</i> /Å                                                                                  | 13.0456(1)                                                     | 5.0208(1)                                                      | 13.2094(5)                                                    |
| <i>c</i> /Å                                                                                  | 8.0244(1)                                                      | 18.0754(5)                                                     | 8.0305(3)                                                     |
| $\alpha$ /°                                                                                  | 90                                                             | 90                                                             | 90                                                            |
| $\beta$ /°                                                                                   | 90                                                             | 113.476(3)                                                     | 97.937(4)                                                     |
| $\gamma$ /°                                                                                  | 90                                                             | 90                                                             | 90                                                            |
| Volume/Å <sup>3</sup>                                                                        | 3022.76(5)                                                     | 1793.97(9)                                                     | 1930.2(1)                                                     |
| <i>Z</i>                                                                                     | 8                                                              | 4                                                              | 4                                                             |
| 2 $\theta$ range for data collection/°                                                       | 7.436 to 157.34                                                | 8.948 to 140.106                                               | 8.272 to 134.146                                              |
| Index ranges                                                                                 | -28 ≤ <i>h</i> ≤ 36, -16 ≤ <i>k</i> ≤ 16, -10 ≤ <i>l</i> ≤ 9   | -25 ≤ <i>h</i> ≤ 26, -6 ≤ <i>k</i> ≤ 6, -22 ≤ <i>l</i> ≤ 21    | -21 ≤ <i>h</i> ≤ 21, -15 ≤ <i>k</i> ≤ 13, -9 ≤ <i>l</i> ≤ 9   |
| No. of measured, independent, and observed [ <i>I</i> > 2 $\sigma$ ( <i>I</i> )] reflections | 34519, 3242, 3014                                              | 32411, 3393, 2842                                              | 17388, 3441, 2334                                             |
| <i>R</i> <sub>int</sub>                                                                      | 0.0376                                                         | 0.0440                                                         | 0.0385                                                        |
| Goodness-of-fit on <i>F</i> <sup>2</sup>                                                     | 1.097                                                          | 1.060                                                          | 1.235                                                         |
| Final <i>R</i> indexes [ <i>F</i> <sup>2</sup> > 2 $\sigma$ ( <i>F</i> <sup>2</sup> )]       | <i>R</i> <sub>1</sub> =0.0234, <i>wR</i> <sub>2</sub> =0.0632  | <i>R</i> <sub>1</sub> =0.0637, <i>wR</i> <sub>2</sub> =0.1753  | <i>R</i> <sub>1</sub> =0.0655, <i>wR</i> <sub>2</sub> =0.1685 |
| Final <i>R</i> indexes [all data]                                                            | <i>R</i> <sub>1</sub> =0.0252, <i>wR</i> <sub>2</sub> = 0.0642 | <i>R</i> <sub>1</sub> =0.0724, <i>wR</i> <sub>2</sub> = 0.1824 | <i>R</i> <sub>1</sub> =0.0973, <i>wR</i> <sub>2</sub> =0.1923 |
| Data/restraints/parameters                                                                   | 3242/0/217                                                     | 3393/151/287                                                   | 3441/0/274                                                    |
| Largest diff. peak/hole Å <sup>-3</sup>                                                      | 0.98/-0.44                                                     | 0.41/-0.40                                                     | 0.65/-0.26                                                    |

***Structure solution and refinement***

The structures were solved with the ShelXT<sup>12</sup> structure solution program using Intrinsic Phasing and refined in the ShelXle by the full-matrix least-squares minimization on *F*<sup>2</sup> with the ShelXL<sup>13</sup> refinement package. All non-hydrogen atoms were refined anisotropically and C–H hydrogens were generated geometrically using the HFIX command as in ShelXL. Hydrogen atoms were refined isotropically and constrained to ride on their parent atoms.

The phenyl group in **1q** is disordered over two orientations with occupancy ratio 0.524(4):0.476(4). The phenyl ring of the first component of disordered structure is rotated around  $59.8^\circ$  with respect to the orientation of the first component. Sums of occupancies of relevant sites were set equal to 1 and refined using free variables. PART instruction was applied to exclude bonding between equivalent disordered atoms. Anisotropic displacement parameters of neighboring disordered atoms were restrained using SIMU and RIGU procedures as in ShelXL. The crystal data and structure refinement descriptors are presented in Table S1. Partial packing diagrams for **1n**, **1q** and **1s** are shown in Figures S12–S17, while selected geometrical parameters are listed in Table S2 and compared to those of **1a**,<sup>14</sup> **1d**,<sup>15</sup> and **1e**.<sup>16</sup>

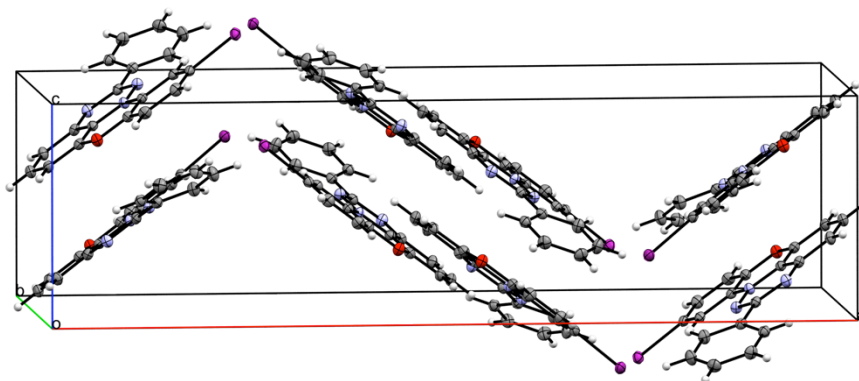

**Figure S12.** Unit cell packing diagram for **1n**.

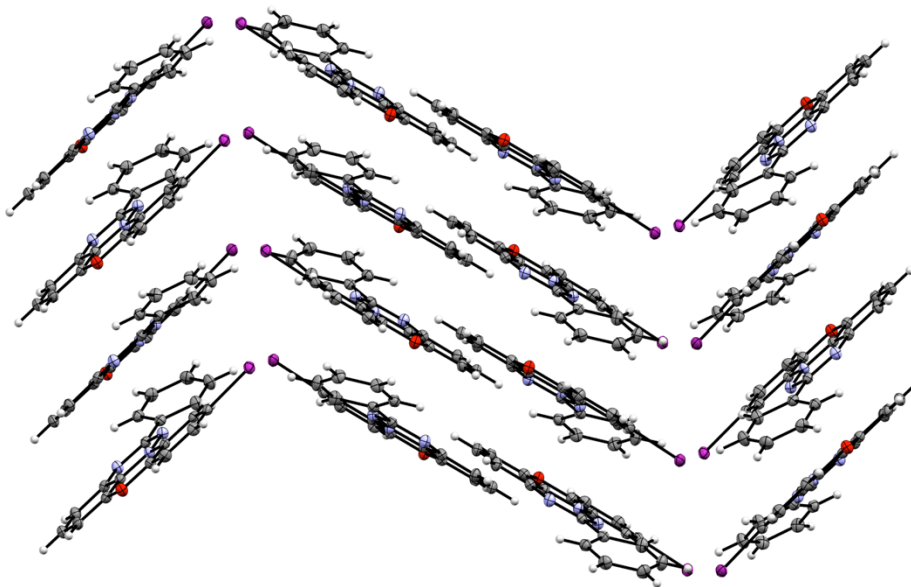

**Figure S13.** Slipped stacks of **1n**. Angles between the adjacent stacks are  $74.8$  and  $8.7^\circ$ .  
Close contacts within the stacks:

C(11)···C(6a) 3.262 Å (-0.138 Å inside VDW separation)

C(3a')···C(6) 3.386 Å (-0.014 Å inside VDW separation)

Close contacts between the stacks:

I···H-C(Ph) 3.140 Å (-0.040 Å inside VDW separation)

C(4)-H···O(7) 2.563 Å (-0.157 Å inside VDW separation)

C(5)-H···C(Ph) 3.383 Å (-0.017 Å inside VDW separation)

Slippage angle - of 23.1° was calculated as an angle defined by O(7)···O(7)···N(12) minus 90°. The two oxygen atoms used for the measurements were for two molecules in the stack with same orientation.

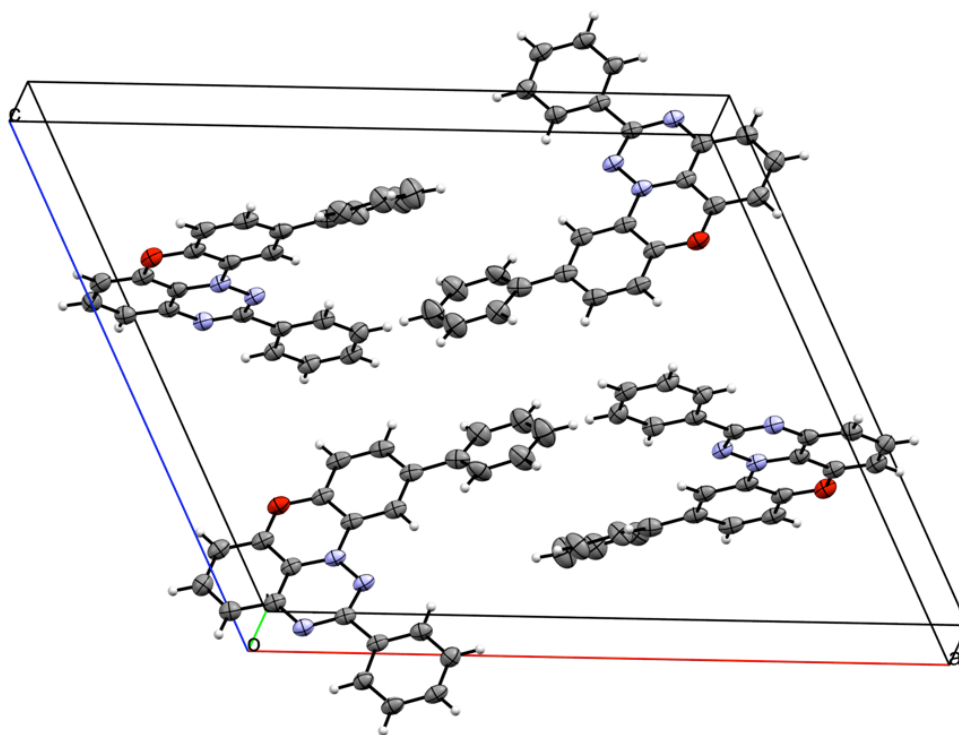

**Figure S14.** Unit cell packing diagram for **1q**.

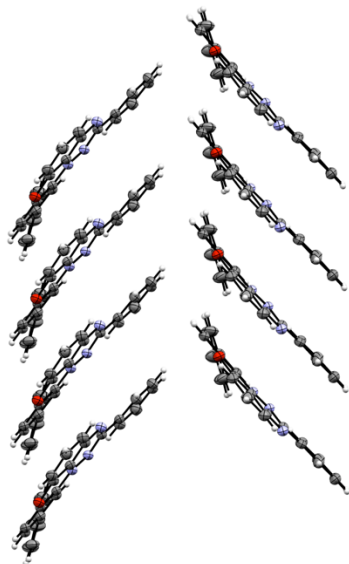

**Figure S15.** Two slipped stacks of **1q**. The angle between the stacks is 80.6°.

Close contacts within the stacks:

*Close contacts between the heterocyclic cores*

C(2)···C(11a) 3.281 Å (-0.119 Å inside VDW separation)

C(3a)···O(7) 3.386 Å (-0.051 Å inside VDW separation)

*Close contacts between the C(10)–Ph groups*

C(*m*)-H···C(*m*') 2.773 Å (-0.627 Å inside VDW separation)

C(*o*)-H···C(*o*') 2.184 Å (-0.716 Å inside VDW separation)

C(*m*')-H···C(*m*) 2.183 Å (-0.717 Å inside VDW separation)

C(*o*')-H···C(*o*) 2.122 Å (-0.778 Å inside VDW separation)

Slippage angle - of 36.8° was calculated as an angle defined by O(7)···O(7)···N(12) minus 90°.

The two oxygen atoms used for the measurements were for two molecules in the stack with same orientation.



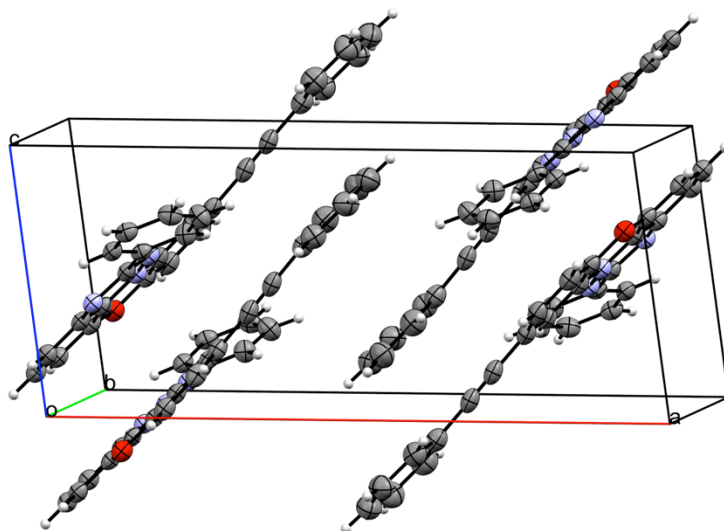

**Figure S16.** Packing diagram for unit cell of **1s**.

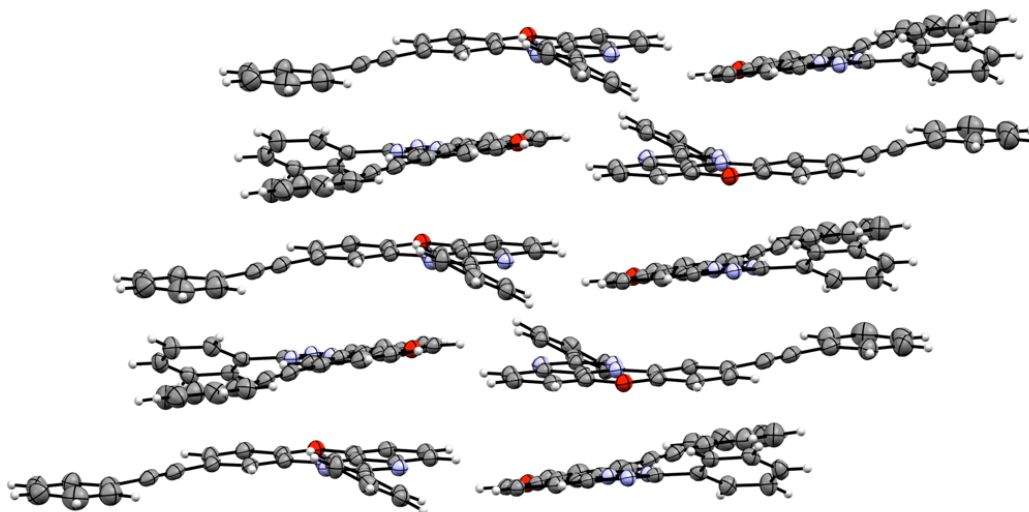

**Figure S17.** Two slipped stacks of **1s**. Angle between the stacks is  $0^\circ$ .

Close contacts within the stacks:

C(6a) $\cdots$ C(11a) 3.207 Å (-0.193 Å inside VDW separation)

C(11a) $\cdots$ C(11) 3.336 Å (-0.064 Å inside VDW separation)

C(7a)-H $\cdots$ C(11) 3.369 Å (-0.031 Å inside VDW separation)

Close contacts between the stacks:

C(4)-H $\cdots$ O(7) 2.577 Å (-0.143 Å inside VDW separation)

Slippage angle - of 23.1° was calculated as an angle defined by O(7) $\cdots$ O(7) $\cdots$ N(12) minus 90°.

The two oxygen atoms used for the measurements were for two molecules in the stack with same orientation.

**Table S2.** Selected interatomic distances and angles for planar benzo[*e*][1,2,4]triazin-4-yl radicals.<sup>a</sup>

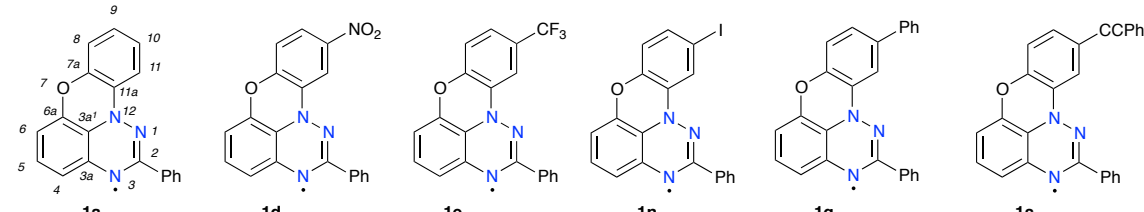

|                                   | <b>1a</b> <sup>b</sup> | <b>1d</b> <sup>c</sup> | <b>1e</b> <sup>d</sup> | <b>1n</b> | <b>1q</b> | <b>1s</b> |
|-----------------------------------|------------------------|------------------------|------------------------|-----------|-----------|-----------|
| $d_{\text{N1-N12}}$               | 1.35(1)                | 1.358(2)               | 1.354(1)               | 1.356(3)  | 1.360(2)  | 1.360(3)  |
| $d_{\text{N1-C2}}$                | 1.32(1)                | 1.343(2)               | 1.343(1)               | 1.343(3)  | 1.346(3)  | 1.340(3)  |
| $d_{\text{C2-N3}}$                | 1.364(9)               | 1.340(2)               | 1.337(1)               | 1.340(3)  | 1.326(3)  | 1.346(4)  |
| $d_{\text{N3-C3a}}$               | 1.38(1)                | 1.373(2)               | 1.375(1)               | 1.376(3)  | 1.378(3)  | 1.382(3)  |
| $d_{\text{C3a-C3a'}}$             | 1.38(1)                | 1.409(2)               | 1.407(1)               | 1.407(3)  | 1.410(3)  | 1.404(4)  |
| $d_{\text{C3a'-C6a}}$             | 1.36(1)                | 1.392(2)               | 1.393(2)               | 1.396(3)  | 1.402(3)  | 1.391(4)  |
| $d_{\text{C6a-O7}}$               | 1.39(1)                | 1.382(2)               | 1.381(1)               | 1.380(3)  | 1.389(3)  | 1.384(3)  |
| $d_{\text{O7-C7a}}$               | 1.381(9)               | 1.367(2)               | 1.379(1)               | 1.381(3)  | 1.371(3)  | 1.388(4)  |
| $d_{\text{N12-C11a}}$             | 1.42(1)                | 1.398(2)               | 1.401(1)               | 1.400(3)  | 1.405(3)  | 1.399(3)  |
| $d_{\text{C2-Ph}}$                | 1.50(1)                | 1.491(2)               | 1.485(1)               | 1.486(3)  | 1.489(3)  | 1.479(4)  |
| $d_{\text{C10-NO2}}$              |                        | 1.465(2)               |                        |           |           |           |
| $\alpha_{\text{N12-N1-C2}}$       | 114.1(6)               | 114.8(1)               | 115.06(1)              | 114.9(2)  | 114.4(2)  | 115.5(2)  |
| $\alpha_{\text{N1-C2-N3}}$        | 130.2(7)               | 128.7(1)               | 128.47(9)              | 128.7(2)  | 128.7(2)  | 128.1(3)  |
| $\alpha_{\text{C7a-O7-C6a}}$      | 118.5(6)               | 117.8(1)               | 117.67(8)              | 118.1(2)  | 117.7(2)  | 117.8(2)  |
| $\alpha_{\text{C3a'-N12-C11a}}$   | 118.6(6)               | 118.8(1)               | 119.09(1)              | 119.0(2)  | 119.8(2)  | 119.4(2)  |
| $\theta_{\text{N12-N1-C2-N3}}$    | 1(1)                   | 0.8(2)                 | 2.6(1)                 | 0.0(3)    | -0.4(3)   | 1.1(4)    |
| $\theta_{\text{C3a'-C6a-O7-C7a}}$ | 0(1)                   | -1.1(2)                | 5.5(1)                 | -1.0(3)   | -3.0(3)   | 2.0(4)    |
| $\beta_{\text{triazine-(C2)Ph}}$  | 2.9                    | 4.7                    | 4.0                    | 22.3      | 2.95      | 25.8      |

<sup>a</sup>  $d$  - interatomic distance,  $\alpha$  - interatomic angle,  $\theta$  - dihedral angle,  $\beta$  - inter-ring angle. <sup>b</sup> Ref<sup>14</sup>. <sup>c</sup> Ref<sup>15</sup>.

<sup>d</sup> Ref<sup>16</sup>.

The intramolecular inter-ring angle was calculated as the angle between two planes: one was defined by all seventeen C and N atoms of the heterocyclic core and the second by six C atom of the Ph substituent. The mean plane of the heterocyclic core

(defined by seventeen C and N atoms) was used to measure the intermolecular separation within the stack and also to measure the angle between the two neighboring stacks.

#### 4. Electronic absorption spectroscopy

Electronic absorption spectra for radicals **1** were recorded in spectroscopic grade  $\text{CH}_2\text{Cl}_2$  at concentrations in a range  $1.5\text{--}10 \times 10^{-5}$  M and fitted to the Beer–Lambert law. Results are shown in Figures S18–S24.

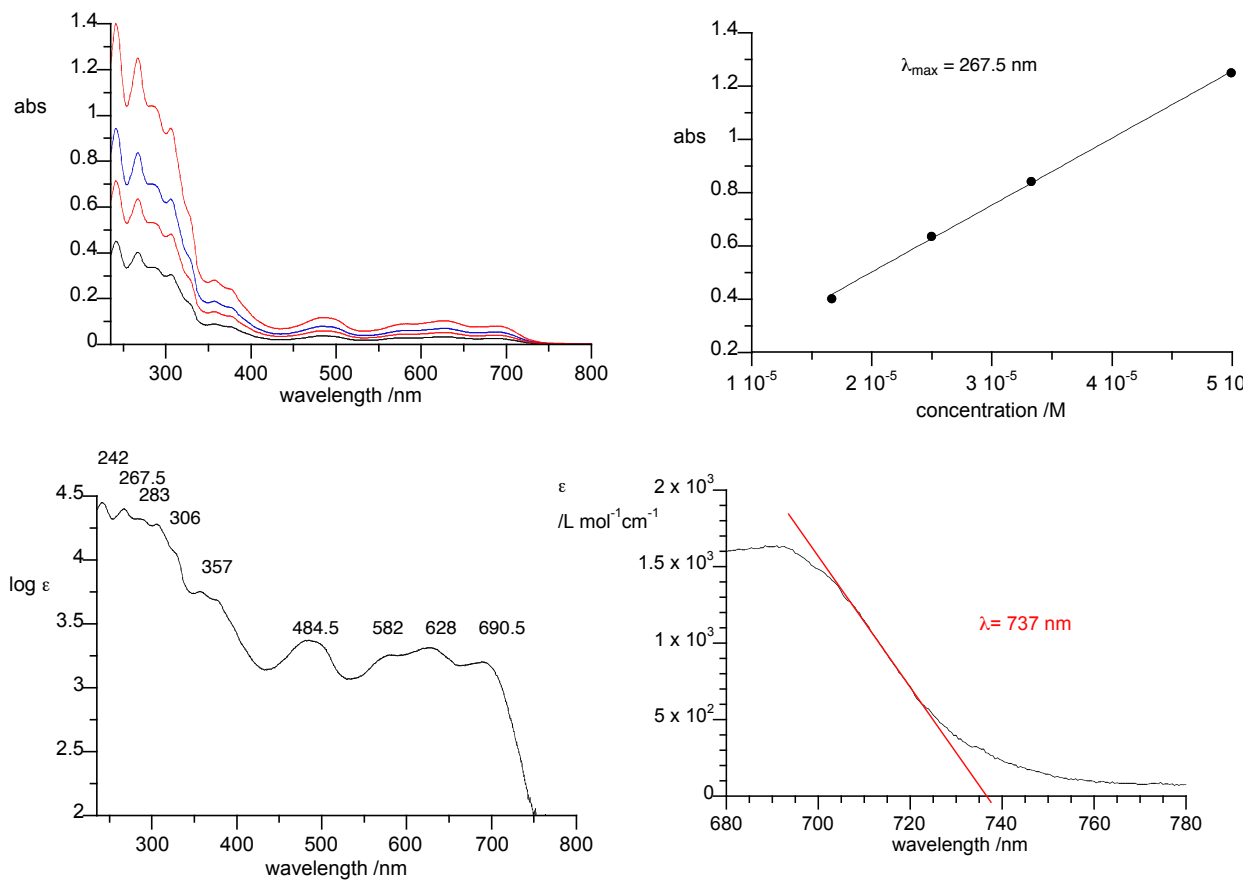

**Figure S18.** Clockwise: electronic absorption spectra for **1n** (X = I) in  $\text{CH}_2\text{Cl}_2$  for four concentrations, determination of molar extinction coefficient  $\epsilon$  at  $\lambda = 267.5$  nm (best fit function:  $\epsilon = 25111 \times \text{conc}$ ,  $r^2 = 0.9991$ ), molar extinction  $\log(\epsilon)$  plot, and onset of absorption (optical band-gap).

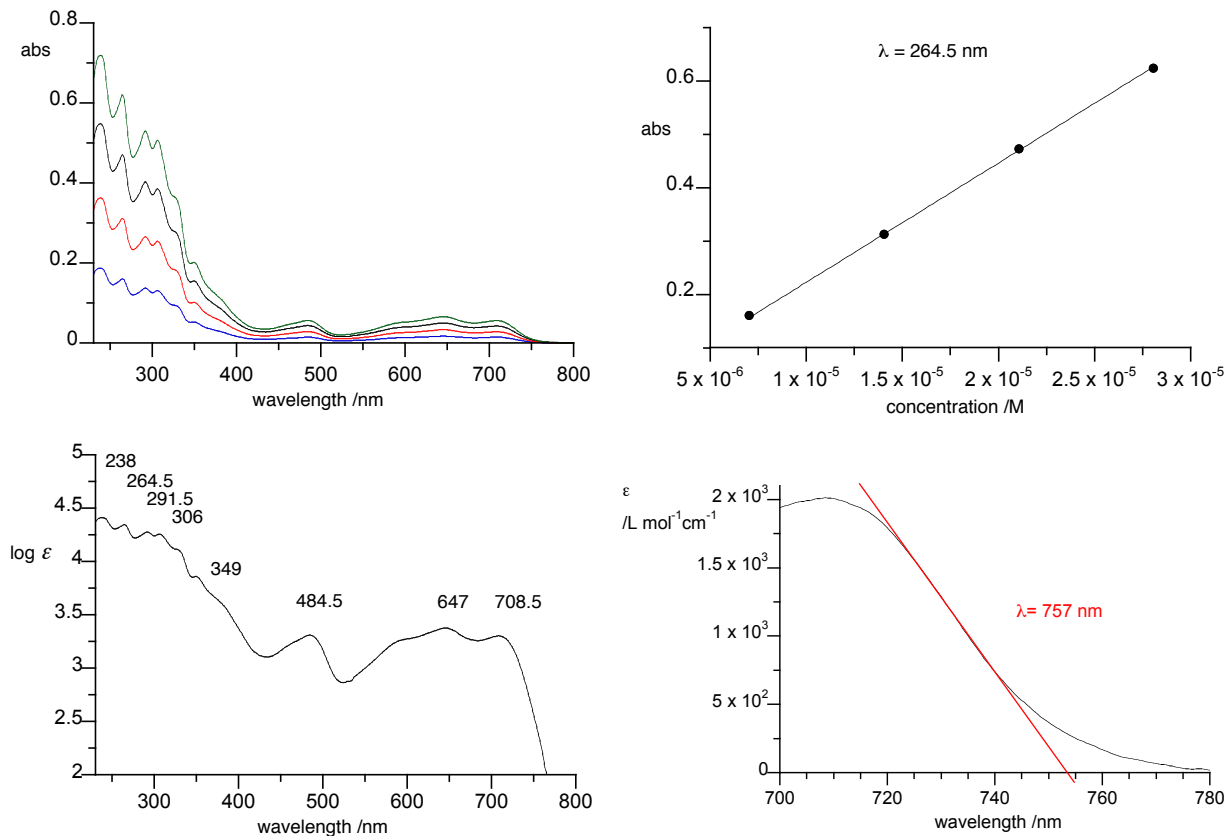

**Figure S19.** Clockwise: electronic absorption spectra for **1p** (X = OBn) in  $\text{CH}_2\text{Cl}_2$  for three concentrations, determination of molar extinction coefficient  $\epsilon$  at  $\lambda = 264.5$  nm (best fit function:  $\epsilon = 22313 \times \text{conc}$ ,  $r^2 = 0.9997$ ), molar extinction  $\log(\epsilon)$  plot, and onset of absorption (optical band-gap).

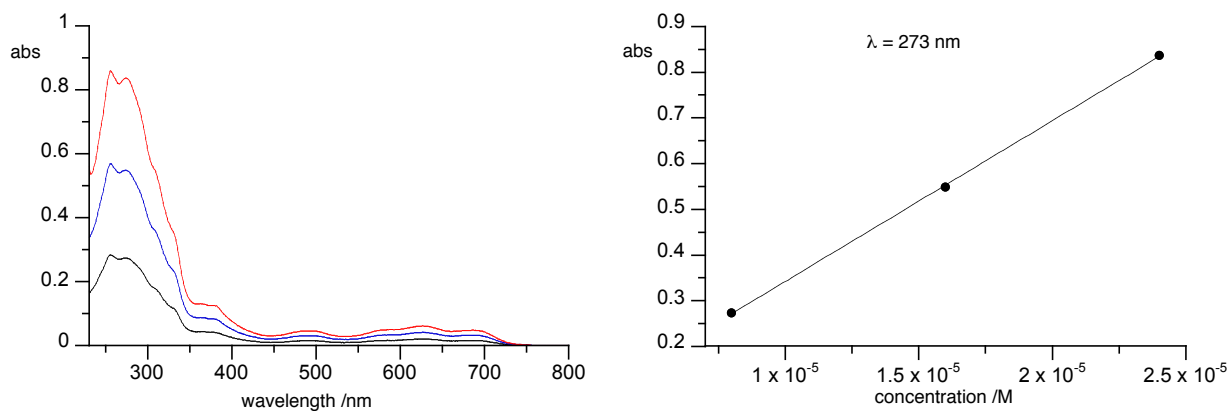

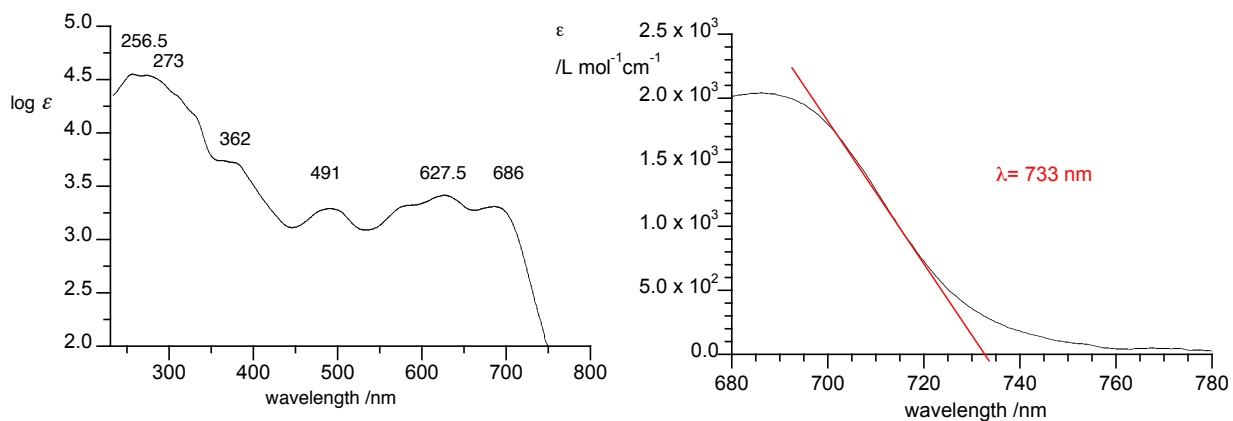

**Figure S20.** Clockwise: electronic absorption spectra for **1q** ( $X = \text{Ph}$ ) in  $\text{CH}_2\text{Cl}_2$  for three concentrations, determination of molar extinction coefficient  $\epsilon$  at  $\lambda = 273 \text{ nm}$  (best fit function:  $\epsilon = 35137 \times \text{conc}$ ,  $r^2 = 0.9998$ ), molar extinction  $\log(\epsilon)$  plot, and onset of absorption (optical band-gap).

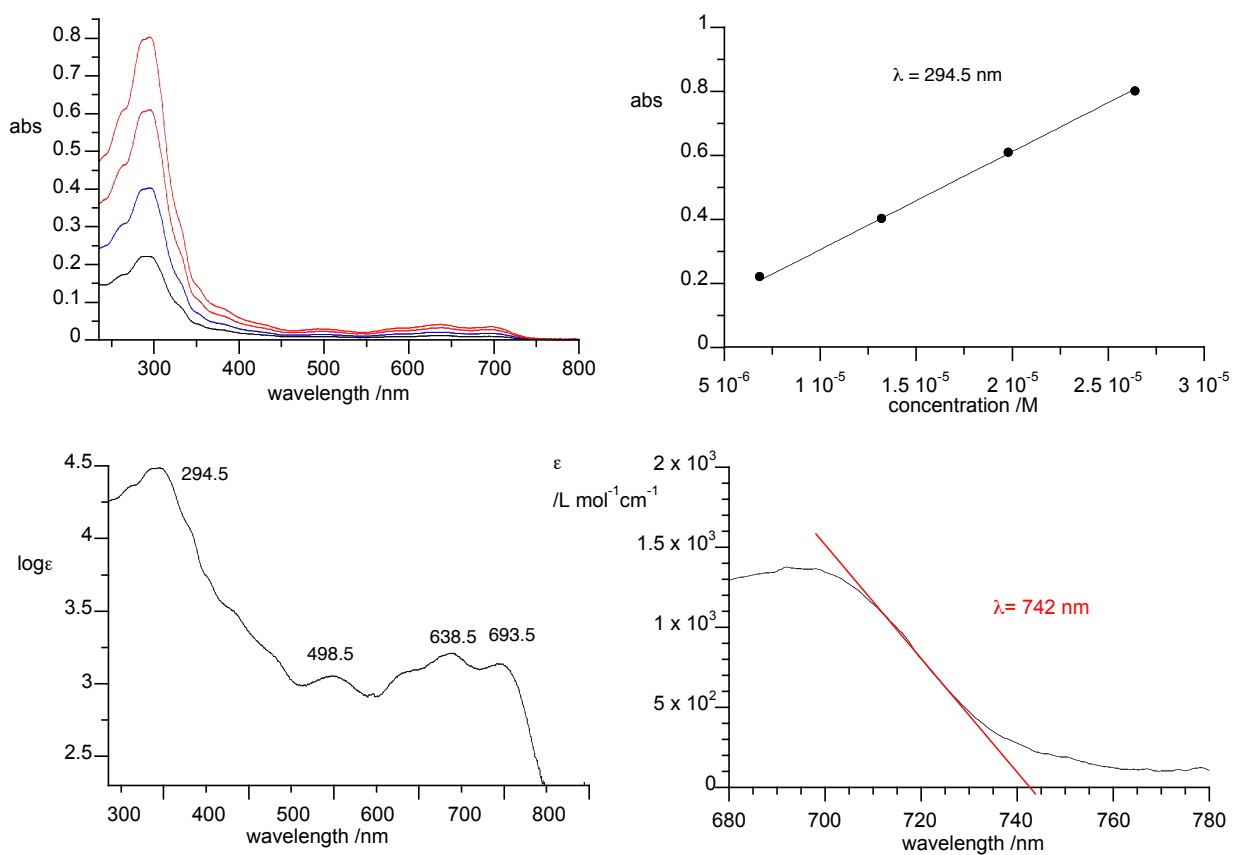

**Figure S21.** Clockwise: electronic absorption spectra for **1r** ( $X = 2\text{-thienyl}$ ) in  $\text{CH}_2\text{Cl}_2$  for four concentrations, determination of molar extinction coefficient  $\epsilon$  at  $\lambda = 294.5 \text{ nm}$  (best fit function:  $\epsilon = 30573 \times \text{conc}$ ,  $r^2 = 0.9989$ ), molar extinction  $\log(\epsilon)$  plot, and onset of absorption (optical band-gap).

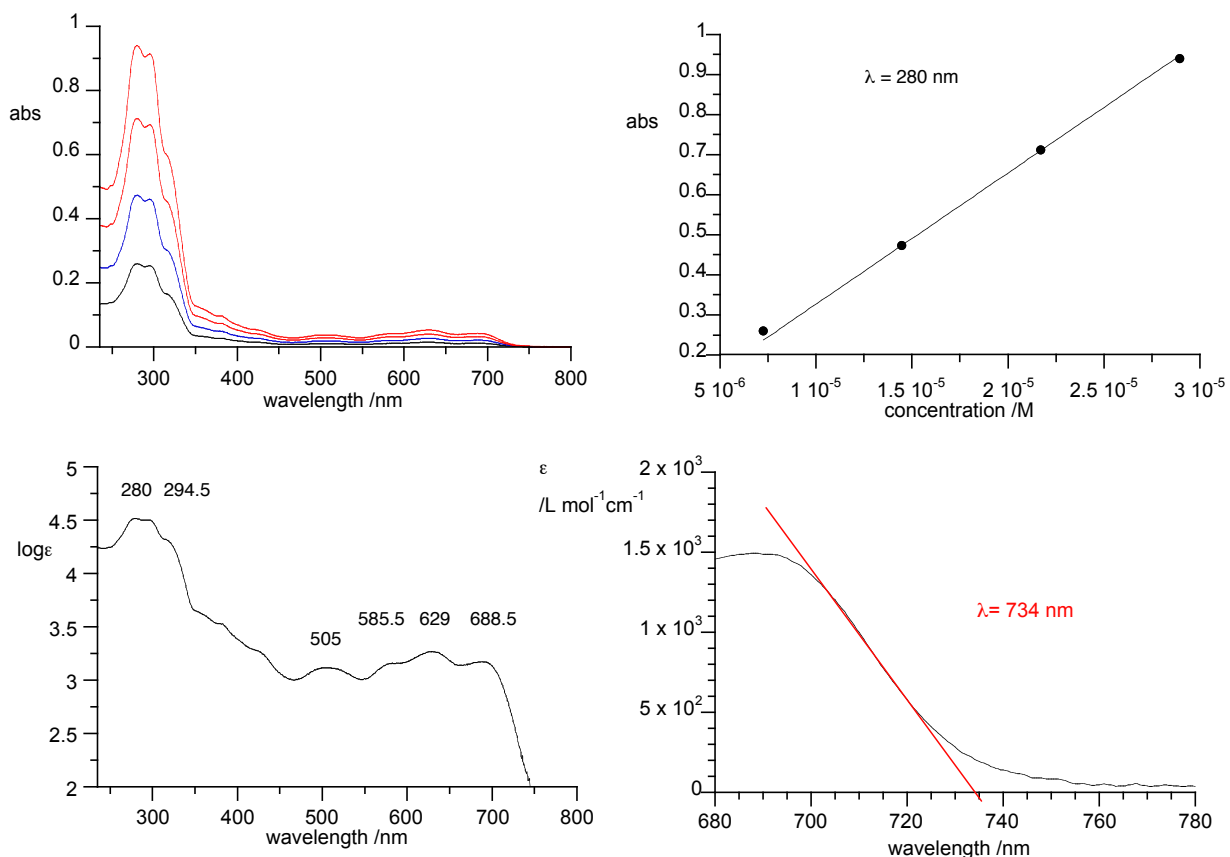

**Figure S22.** Clockwise: electronic absorption spectra for **1s** ( $X = \text{CCPh}$ ) in  $\text{CH}_2\text{Cl}_2$  for four concentrations, determination of molar extinction coefficient  $\epsilon$  at  $\lambda = 280 \text{ nm}$  (best fit function:  $\epsilon = 32701 \times \text{conc}$ ,  $r^2 = 0.9978$ ), molar extinction  $\log(\epsilon)$  plot, and onset of absorption (optical band-gap).

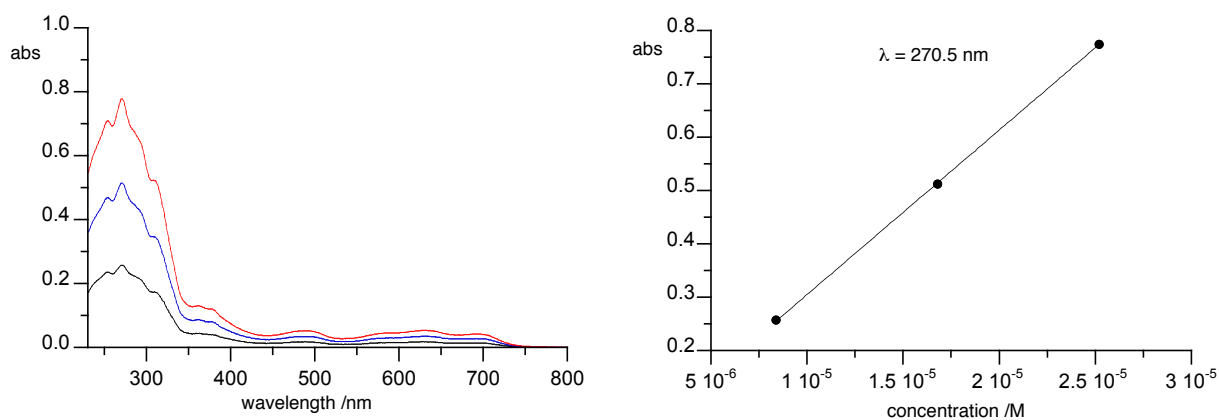

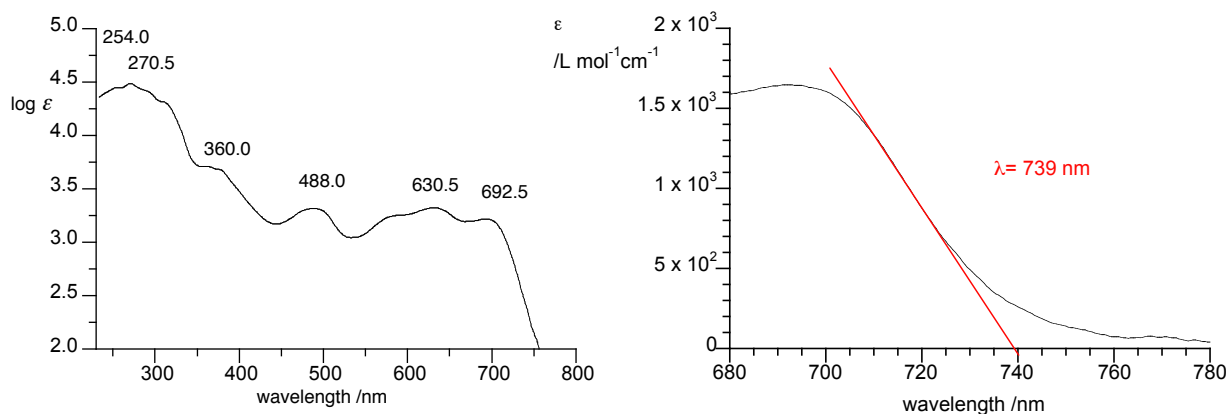

**Figure S23.** Clockwise: electronic absorption spectra for **1u** ( $X = \text{NHCOCF}_3$ ) in  $\text{CH}_2\text{Cl}_2$  for three concentrations, determination of molar extinction coefficient  $\epsilon$  at  $\lambda = 270.5$  nm (best fit function:  $\epsilon = 30788 \times \text{conc}$ ,  $r^2 = 0.9999$ ), molar extinction  $\log(\epsilon)$  plot, and onset of absorption (optical band-gap).

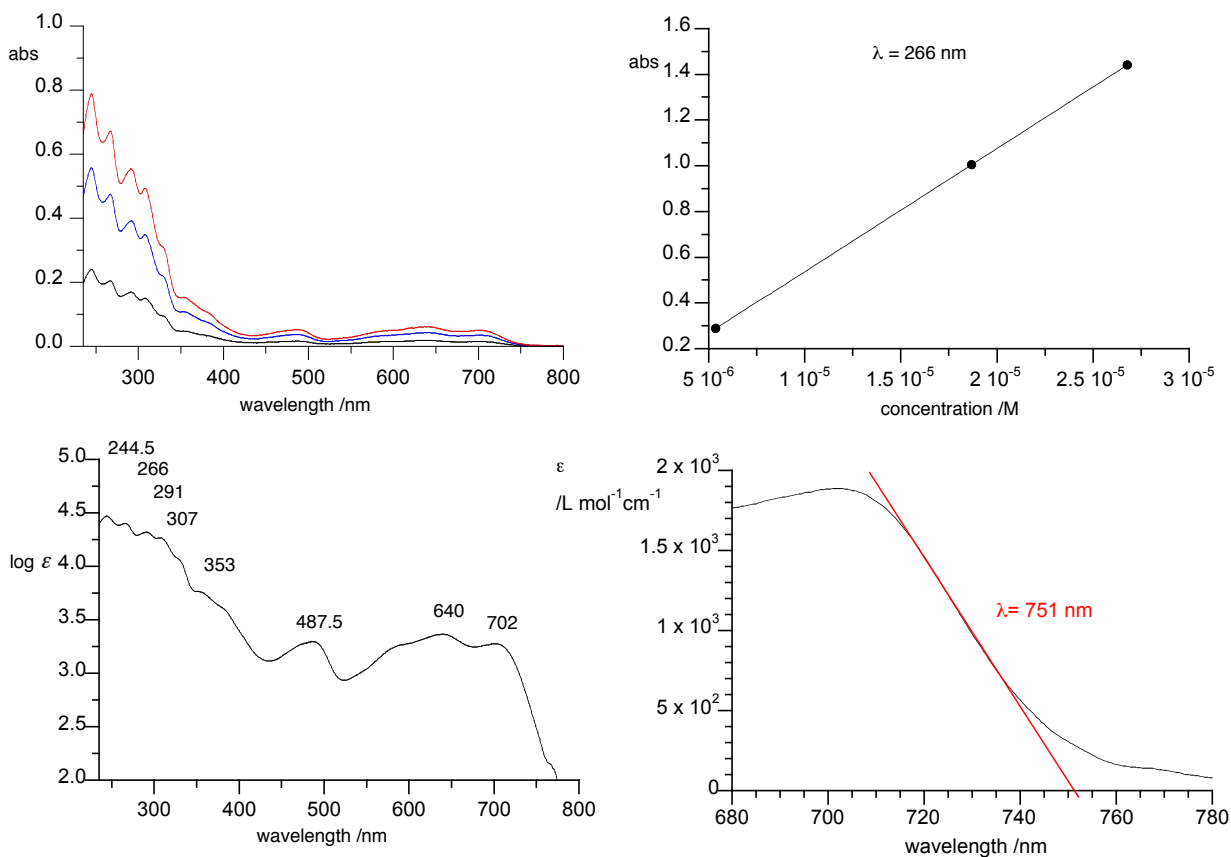

**Figure S24.** Clockwise: electronic absorption spectra for **1v** ( $X = \text{NHCOOMe}$ ) in  $\text{CH}_2\text{Cl}_2$  for three concentrations, determination of molar extinction coefficient  $\epsilon$  at  $\lambda = 266$  nm (best fit function:  $\epsilon = 53718 \times \text{conc}$ ,  $r^2 = 0.9999$ ), molar extinction  $\log(\epsilon)$  plot, and onset of absorption (optical band-gap).



## 5. Electrochemical results

The electrochemical characterization of selected radicals was conducted using Autolab PGSTAT128N potentiostat/galvanostat instrument in dry and degassed  $\text{CH}_2\text{Cl}_2$  (concentration 0.5 mM) in the presence of  $[\text{n-Bu}_4\text{N}]^+[\text{PF}_6]^-$  as an electrolyte (concentration 50 mM) using glassy carbon as the working electrode and Ag/AgCl as the reference electrode with a scan rate of  $50 \text{ mV s}^{-1}$  at *ca.*  $20^\circ\text{C}$ . In the end of each measurement decamethylferrocene ( $\text{FcMe}_{10}$ ) was added and the peak potentials were referenced to the  $\text{FcMe}_{10}/\text{FcMe}_{10}^+$  couple. The oxidation potential for the  $\text{FcMe}_{10}/\text{FcMe}_{10}^+$  couple was established at  $-0.56 \text{ V}$  vs the  $\text{Fc}/\text{Fc}^+$  couple.<sup>17</sup>

Cyclic voltammetry (CV) plots are shown in Figures S25–S32 and numerical result are shown in Table 3 in the main text.

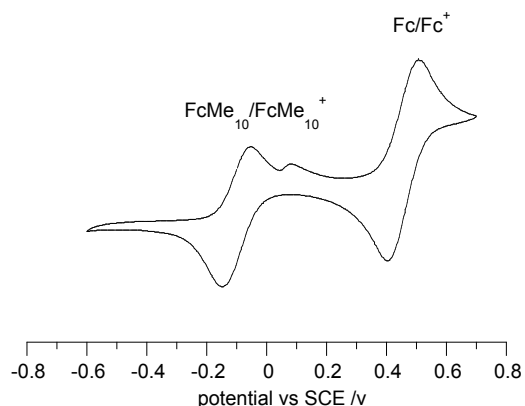

**Figure S25.** Cyclic voltammogram for ferrocene (Fc) and decamethylferrocene ( $\text{FcMe}_{10}$ ). The small peak at about  $0.05 \text{ V}$  is related to some impurity in the commercial  $\text{FcMe}_{10}$ .

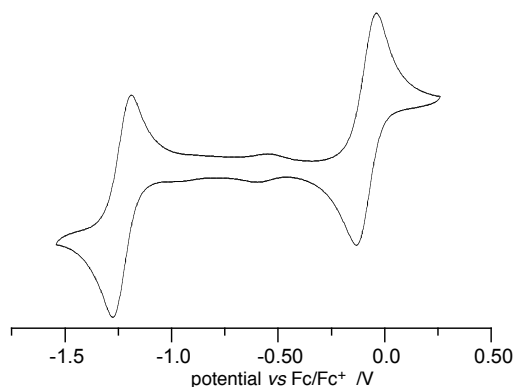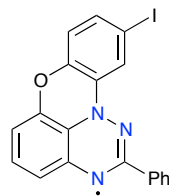

**Figure S26.** Cyclic voltammogram for **1n**.

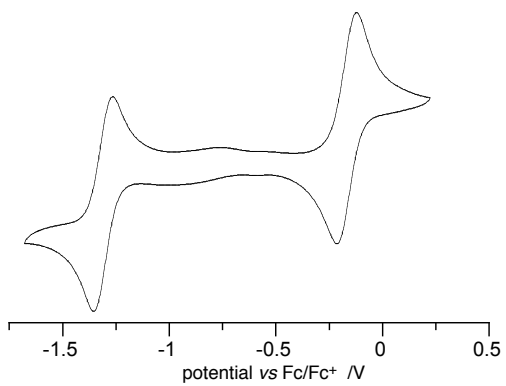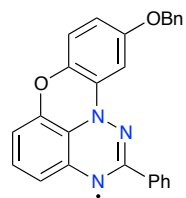

**Figure S27.** Cyclic voltammogram for **1p**.

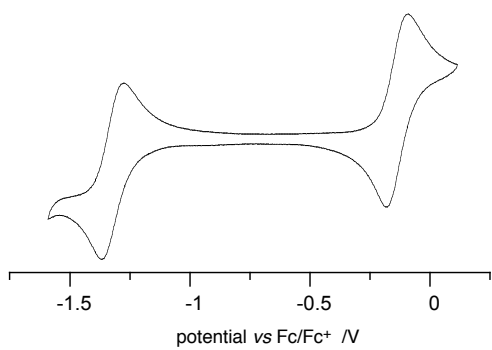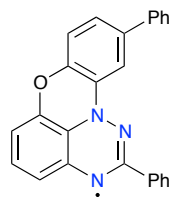

**Figure S28.** Cyclic voltammogram for **1q**.

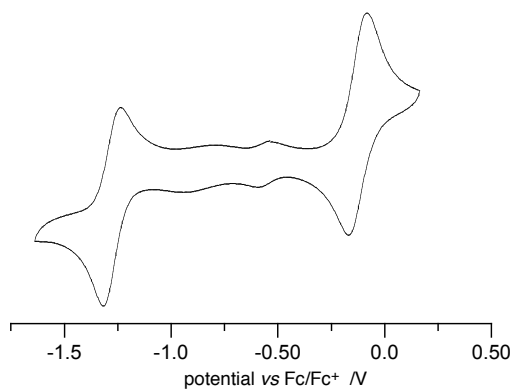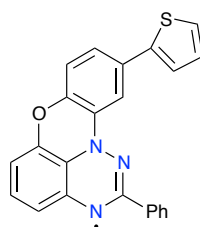

**Figure S29.** Cyclic voltammogram for **1r**.

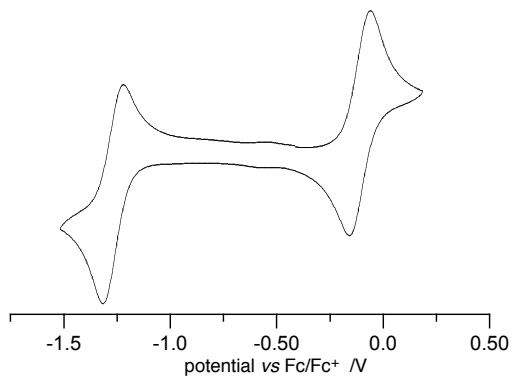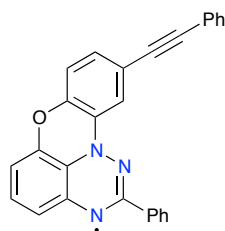

**Figure S30.** Cyclic voltammogram for **1s**.

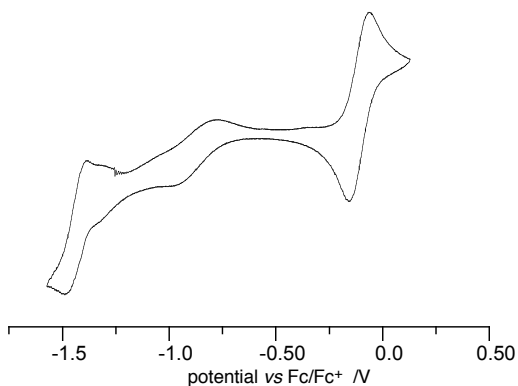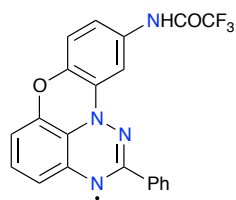

**Figure S31.** Cyclic voltammogram for **1u**.

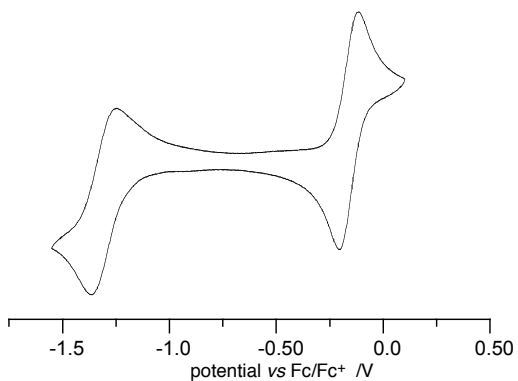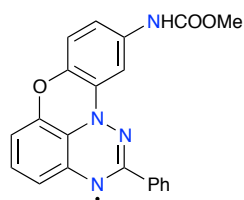

**Figure S32.** Cyclic voltammogram for **1v**.

## 6. EPR spectra

EPR spectra for radicals **1** were recorded on an X-band EMX-Nano EPR spectrometer at ambient temperature on dilute and degassed solutions in distilled benzene in a concentration range of  $2\text{--}5 \times 10^{-4}$  M. Acid **1f** showed insufficient solubility to record its isotropic EPR spectrum. The microwave power was set with the Power Sweep program below the saturation of the signal, modulation frequency of 100 kHz, modulation amplitude of  $0.5 G_{pp}$  and spectral

width of 100 G. Accurate  $g$ -values were obtained using TEMPO as EMX-Nano internal standard.

Simulations of the spectra were performed with the EasySpin (Matlab) using all EPR-active nuclei and DFT results as the starting point for simulations. The chemically equivalent nuclei (H in the Ph substituent) were treated as a group of 2 identical nuclei. The resulting  $hfcc$  values were perturbed several times until a global minimum for the fit was achieved. Experimental and simulated spectra are shown in Figures S33–S39 and resulting  $hfcc$  are listed in Table S3. The  $hfcc$  values were assigned to the nitrogen nuclei in **1** on the basis of trends in DFT results (section 7.b; *vide infra*).

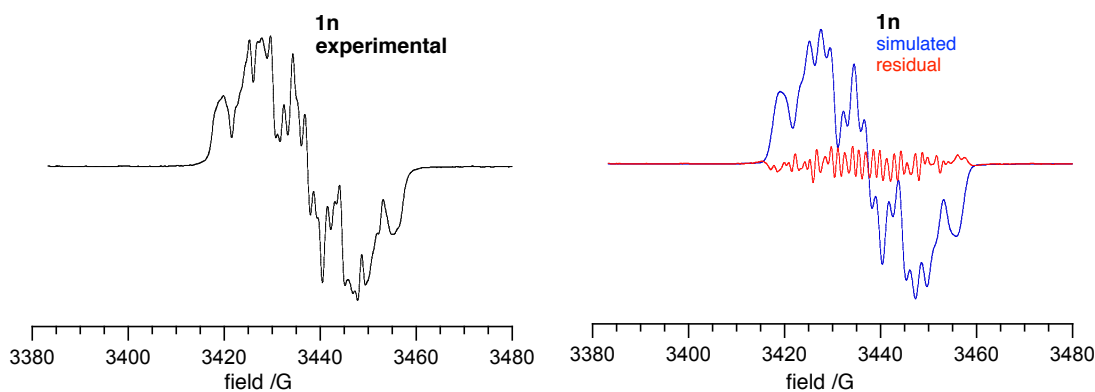

**Figure S33.** Experimental (black, left), simulated (blue, right) and difference (red, right) spectra for **1n** (X = I) recorded in benzene at *ca* 20 °C.

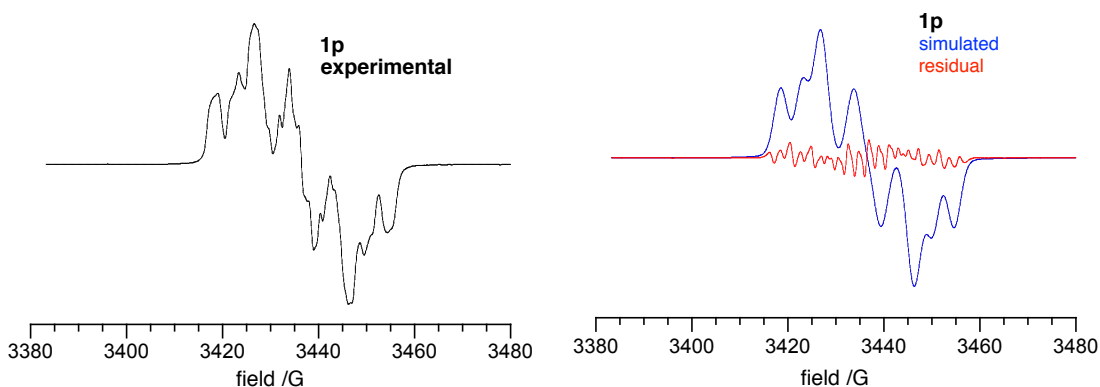

**Figure S34.** Experimental (black, left), simulated (blue, right) and difference (red, right) spectra for **1p** (X = OBn) recorded in benzene at *ca* 20 °C.

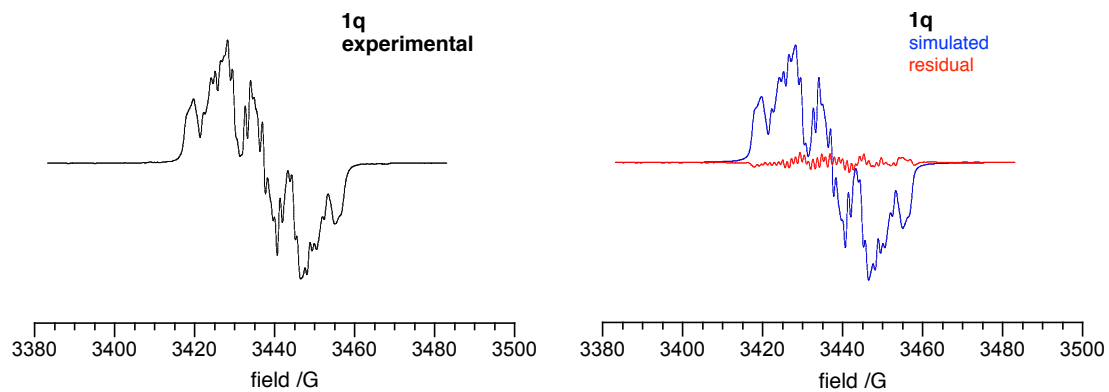

**Figure S35.** Experimental (black, left), simulated (blue, right) and difference (red, right) spectra for **1q** (X = Ph) recorded in benzene at *ca* 20 °C.

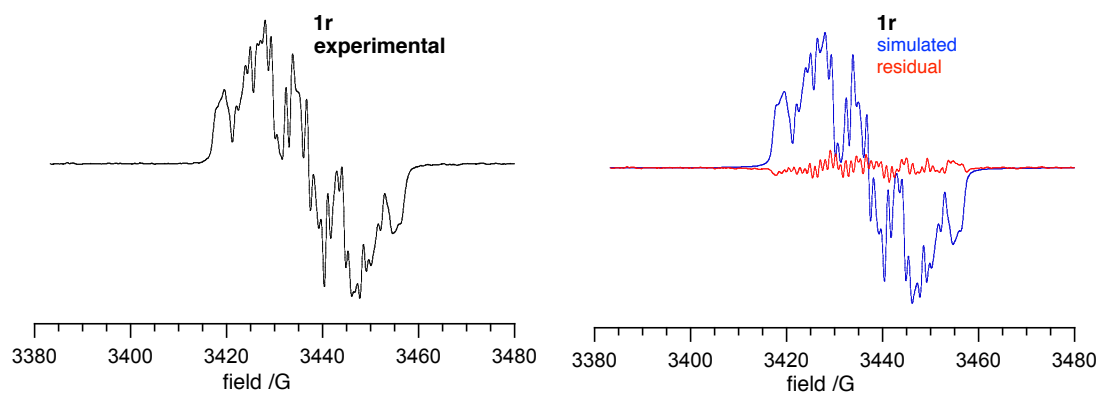

**Figure S36.** Experimental (black, left), simulated (blue, right) and difference (red, right) spectra for **1r** (X = 2-thienyl) recorded in benzene at *ca* 20 °C.

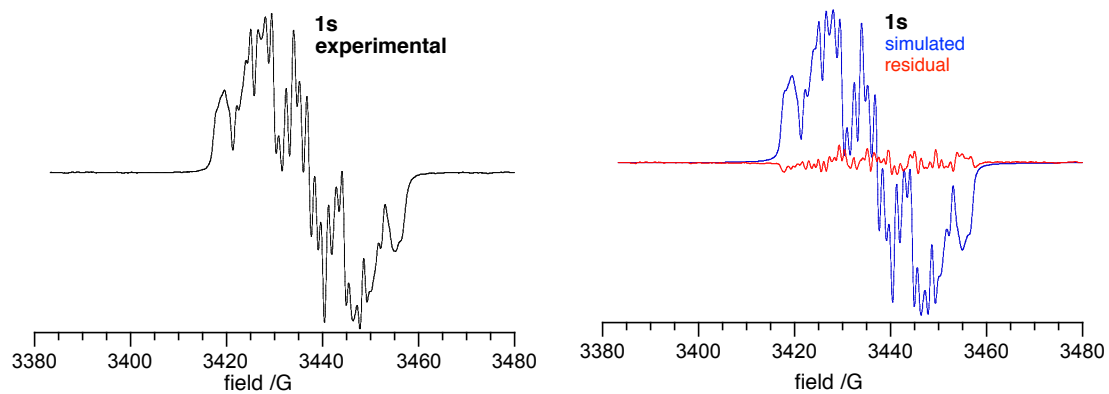

**Figure S37.** Experimental (black, left), simulated (blue, right) and difference (red, right) spectra for **1s** (X = CPh) recorded in benzene at *ca* 20 °C.

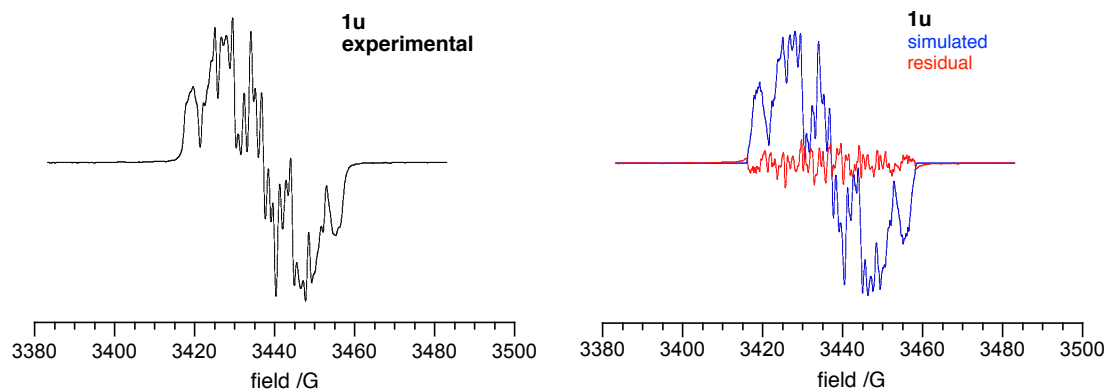

**Figure S38.** Experimental (black, left), simulated (blue, right) and difference (red, right) spectra for **1u** ( $X = \text{NHCOCF}_3$ ) recorded in benzene at *ca* 20 °C.

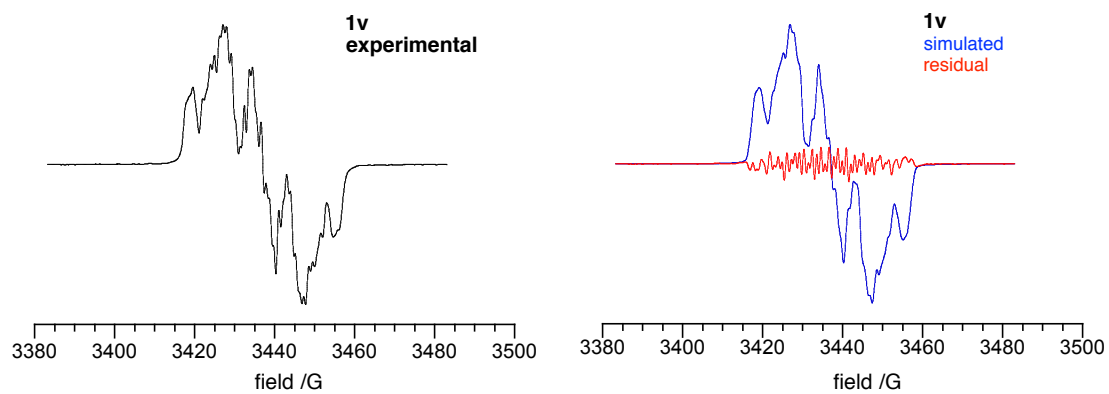

**Figure S39.** Experimental (black, left), simulated (blue, right) and difference (red, right) spectra for **1v** ( $X = \text{NHCOOMe}$ ) recorded in benzene at *ca* 20 °C.

**Table S3.** Experimental hyperfine coupling constants (G) and g values for radicals in series **1** recorded in benzene at 22 °C.

| atom               | <b>1a</b> | <b>1b</b> | <b>1c</b> | <b>1d</b>       | <b>1e</b>       | <b>1f</b> | <b>1g</b> | <b>1h</b> | <b>1i</b> | <b>1j</b> |
|--------------------|-----------|-----------|-----------|-----------------|-----------------|-----------|-----------|-----------|-----------|-----------|
|                    | H         | COOMe     | CN        | NO <sub>2</sub> | CF <sub>3</sub> | OMe       | F         | Cl        | Br        | Ac        |
| a <sub>N(12)</sub> | 7.51      | 7.29      | 7.03      | 6.95            | 7.11            | 7.37      | 7.15      | 7.15      | 7.15      | 7.24      |
| a <sub>N(1)</sub>  | 4.28      | 4.44      | 4.50      | 4.55            | 4.50            | 4.29      | 4.40      | 4.46      | 4.42      | 4.41      |
| a <sub>N(3)</sub>  | 4.42      | 4.52      | 4.70      | 4.66            | 4.53            | 4.37      | 4.44      | 4.54      | 4.48      | 4.52      |
| a <sub>N</sub>     | –         | -         | 1.81      | 1.06            | -               | -         | -         | -         | -         | -         |
| a <sub>H/F</sub>   | -         | -         | -         | -               | 2.04            | -         | 2.02      | -         | -         | -         |
| a <sub>H</sub>     | 1.94      | 0.87      | 1.51      | 2.07            | 1.58            | 2.14      | 1.76      | 2.08      | 1.98      | 2.02      |
| a <sub>H</sub>     | 1.11      | 1.84      | 1.49      | 0.78            | 1.04            | 1.57      | 1.39      | 1.76      | 1.76      | 1.61      |
| a <sub>H</sub>     | 0.72      | 1.98      | 1.44      | 0.96            | 0.82            | 1.12      | 0.75      | 1.49      | 1.01      | 0.78      |
| a <sub>H</sub>     | 0.60      | 1.13      | 0.67      | 0.67            | 0.44            | 0.71      | 0.57      | 1.44      | 0.89      | 0.44      |
| a <sub>H</sub>     | 0.39      | 0.62      | 0.57      | 0.34            | 0.41            | 0.71      | 0.44      | 0.71      | 0.31      | 0.40      |
| a <sub>H</sub>     | 0.29      | 0.23      | 0.39      | 0.41            | 0.23            | 0.37      | 0.13      | 0.45      | 0.18      | 0.30      |
| a <sub>H</sub>     | 0.11      | 0.27      | 0.17      | 0.32            | 0.07            | 0.33      | 0.10      | 0.29      | 0.17      | 0.20      |
| a <sub>H</sub>     | 0.10      | 0.33      | 0.10      | 0.17            | 0.00            | 0.23      | 0.08      | 0.05      | 0.08      | 0.14      |
| a <sub>H</sub>     | 0.09      | 0.37      | 0.07      | 0.66            | 0.05            | 0.09      | 0.03      | 0.01      | 0.28      | 0.05      |
| <i>g</i>           | 2.0036    | 2.0037    | 2.0035    | 2.0039          | 2.0039          | 2.0038    | 2.0035    | 2.0038    | 2.0034    | 2.0039    |

**Table S3.** Continues

| atom               | <b>1l</b><br>NH <sub>2</sub> | <b>1m</b><br>NHAc | <b>1n</b><br>l | <b>1p</b><br>OBn | <b>1q</b><br>Ph | <b>1r</b><br>Thienyl | <b>1s</b><br>CCPh | <b>1u</b><br>NHCOCF <sub>3</sub> | <b>1v</b><br>NHCOOMe |
|--------------------|------------------------------|-------------------|----------------|------------------|-----------------|----------------------|-------------------|----------------------------------|----------------------|
| a <sub>N(12)</sub> | 7.26                         | 7.43              | 7.15           | 7.60             | 7.42            | 7.35                 | 7.18              | 7.22                             | 7.34                 |
| a <sub>N(1)</sub>  | 4.18                         | 4.32              | 4.46           | 4.15             | 4.30            | 4.39                 | 4.30              | 4.42                             | 4.30                 |
| a <sub>N(3)</sub>  | 4.34                         | 4.35              | 4.54           | 4.33             | 4.35            | 4.42                 | 4.35              | 4.50                             | 4.53                 |
| a <sub>N</sub>     | 1.52                         | 1.32              | -              | -                | -               | -                    | -                 | 1.36                             | 1.38                 |
| a <sub>H/F</sub>   | -                            | -                 | -              | -                | -               | -                    | -                 | -                                | -                    |
| a <sub>H</sub>     | 1.43                         | 0.71              | 2.08           | 1.99             | 1.92            | 1.70                 | 1.82              | 1.77                             | 1.50                 |
| a <sub>H</sub>     | 1.05                         | 0.73              | 1.76           | 1.00             | 1.84            | 1.93                 | 1.80              | 0.57                             | 1.06                 |
| a <sub>H</sub>     | 0.74                         | 0.75              | 1.49           | 0.90             | 1.11            | 0.85                 | 1.06              | 0.51                             | 0.76                 |
| a <sub>H</sub>     | 0.71                         | 0.40              | 1.44           | 0.65             | 0.71            | 0.14                 | 0.71              | 0.69                             | 0.67                 |
| a <sub>H</sub>     | 0.75                         | 1.08              | 0.71           | 0.50             | 0.79            | 0.40                 | 0.72              | 0.69                             | 0.73                 |
| a <sub>H</sub>     | 0.68                         | 0.36              | 0.45           | 0.31             | 0.59            | 0.39                 | 0.30              | 0.69                             | 0.73                 |
| a <sub>H</sub>     | 0.41                         | 0.41              | 0.29           | 0.40             | 0.42            | 0.28                 | 0.37              | 0.40                             | 0.69                 |
| a <sub>H</sub>     | 0.27                         | 0.38              | 0.01           | 0.18             | 0.32            | 0.27                 | 0.36              | 0.23                             | 0.46                 |
| a <sub>H</sub>     | 0.40                         | 0.31              | 0.05           | 0.07             | 0.30            | 0.42                 | 0.17              | 0.52                             | 0.42                 |
| g                  | 2.035                        | 2.0039            | 2.0036         | 2.0040           | 2.0037          | 2.0035               | 2.0034            | 2.0036                           | 2.0036               |

## 7. Computational details and results

### *a) geometry optimization*

Quantum-mechanical calculations were carried out using Gaussian 09 suite of programs.<sup>18</sup> Geometry optimizations were undertaken at the UB3LYP/6-31G(2d,p) level of theory for radicals and at the B3LYP/6-31G(2d,p) level for closed-shell systems using tight convergence limits and appropriate symmetry constraints ( $C_1$  or  $C_s$ ). For derivatives containing COR, OR, NHCOR, 2-thienyl and OAc at least two orientations of the functional group relative to the heterocyclic ring were tested in an attempt at location of the global minimum. Vibrational frequencies were used to characterize the nature of the stationary points and to obtain thermodynamic parameters.



For all calculations involving Br and I atoms LANL2DZdp basis set and ECP were used (available from Basis Set Exchange v 1.2.2) requested with the *gen* keyword.

Selected bond lengths for radicals in series **1** are listed in Table S4.

**Table S4.** Selected interatomic distances for radicals in series **1**.<sup>a</sup>

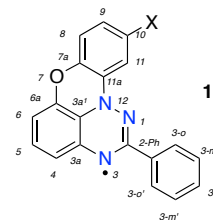

|                                   | N12–N1<br>/Å | N1–C2<br>/Å | C2–N3<br>/Å | N12–C3a'<br>/Å | C6a–O7<br>/Å | O7–C7a<br>/Å | C11a–N12<br>/Å |
|-----------------------------------|--------------|-------------|-------------|----------------|--------------|--------------|----------------|
| <b>1a</b> , X=H                   | 1.3521       | 1.3429      | 1.3345      | 1.3883         | 1.3725       | 1.3748       | 1.4024         |
| <b>1b</b> , X=COOMe               | 1.3518       | 1.3432      | 1.3349      | 1.3876         | 1.3758       | 1.3688       | 1.4034         |
| <b>1c</b> , X=CN                  | 1.35165      | 1.3443      | 1.3349      | 1.38785        | 1.3775       | 1.3669       | 1.4005         |
| <b>1d</b> , X=NO <sub>2</sub>     | 1.3513       | 1.3444      | 1.3353      | 1.38745        | 1.3787       | 1.3648       | 1.4005         |
| <b>1e</b> , X=CF <sub>3</sub>     | 1.3517       | 1.3438      | 1.3348      | 1.3882         | 1.37575      | 1.3699       | 1.4009         |
| <b>1f</b> , X=OMe                 | 1.3527       | 1.3429      | 1.3338      | 1.3896         | 1.3697       | 1.3781       | 1.4007         |
| <b>1g</b> , X=F                   | 1.3519       | 1.3435      | 1.3344      | 1.3890         | 1.3718       | 1.3759       | 1.3993         |
| <b>1h</b> , X=Cl                  | 1.3518       | 1.3436      | 1.3345      | 1.3888         | 1.3737       | 1.3730       | 1.4000         |
| <b>1i</b> , X=Br                  | 1.3516       | 1.3439      | 1.3349      | 1.3888         | 1.3731       | 1.3715       | 1.4002         |
| <b>1j</b> , X=COMe                | 1.3522       | 1.3436      | 1.3346      | 1.3876         | 1.3758       | 1.3685       | 1.4032         |
| <b>1l</b> , X=NH <sub>2</sub>     | 1.3527       | 1.3426      | 1.3338      | 1.3894         | 1.3683       | 1.3793       | 1.4010         |
| <b>1m</b> , X=NHAc                | 1.3527       | 1.3432      | 1.3338      | 1.3887         | 1.3704       | 1.3763       | 1.4009         |
| <b>1n</b> , X=I                   | 1.3515       | 1.3438      | 1.3349      | 1.3885         | 1.3736       | 1.3712       | 1.4005         |
| <b>1o</b> , X=OH                  | 1.3527       | 1.3432      | 1.3338      | 1.3894         | 1.3694       | 1.3784       | 1.3996         |
| <b>1p</b> , X=OBn                 | 1.3527       | 1.3430      | 1.3338      | 1.3897         | 1.3698       | 1.3778       | 1.4007         |
| <b>1q</b> , X=Ph                  | 1.3521       | 1.3429      | 1.3345      | 1.3884         | 1.3726       | 1.3736       | 1.4027         |
| <b>1r</b> , X=Thioph              | 1.3520       | 1.3431      | 1.3344      | 1.3884         | 1.3729       | 1.3729       | 1.4026         |
| <b>1s</b> , X=CCPh                | 1.3521       | 1.3430      | 1.33475     | 1.3881         | 1.3737       | 1.37165      | 1.4027         |
| <b>1t</b> , X=OAc                 | 1.3520       | 1.3433      | 1.3343      | 1.3887         | 1.3723       | 1.3749       | 1.4005         |
| <b>1u</b> , X=NHCOCF <sub>3</sub> | 1.3525       | 1.3439      | 1.3339      | 1.3886         | 1.3725       | 1.3734       | 1.3997         |
| <b>1v</b> , X=NHCOOMe             | 1.3525       | 1.3432      | 1.3338      | 1.3890         | 1.3703       | 1.3766       | 1.4006         |

<sup>a</sup> UB3LYP/6-31G(2d,p) level of theory in vacuum.

### b) *hfcc* calculations

Isotropic Fermi contact coupling constants for radicals **1** were calculated using the UCAM-B3LYP/EPR-III // UB3LYP/6-31G(2d,p) method in benzene dielectric medium requested with the SCRF(Solvent=Benzene) keyword (PCM model<sup>19</sup>). For calculations involving heavier elements two different basis sets were requested with the *gen* keyword: EPR-III for light elements (H–F) and triple zeta for heavier elements. Thus, 6-311+G(2df) basis set for Cl and S atoms and LANL2DZdp basis set and ECP for Br and I atoms. The resulting *hfcc* values are shown in Table S5 and spin densities are listed in Table S6.

**Table S5.** Calculated hyperfine coupling constants (G) for radicals in series **1** in benzene.<sup>a</sup>

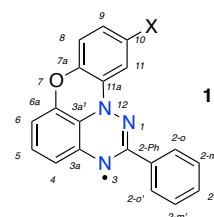

| <i>hfcc</i><br>/G              | <b>1a</b> <sup>b</sup><br>H | <b>1b</b><br>COOMe | <b>1c</b><br>CN | <b>1d</b><br>NO <sub>2</sub> | <b>1e</b><br>CF <sub>3</sub> | <b>1f</b><br>OMe | <b>1g</b><br>F | <b>1h</b><br>Cl | <b>1i</b><br>Br | <b>1j</b><br>COMe |
|--------------------------------|-----------------------------|--------------------|-----------------|------------------------------|------------------------------|------------------|----------------|-----------------|-----------------|-------------------|
| <i>a</i> <sub>N(12)</sub>      | 6.13                        | 5.98               | 5.64            | 5.55                         | 5.77                         | 6.19             | 5.84           | 5.83            | 5.84            | 6.02              |
| <i>a</i> <sub>N(1)</sub>       | 3.95                        | 4.08               | 4.26            | 4.31                         | 4.18                         | 3.85             | 4.07           | 4.10            | 4.10            | 4.07              |
| <i>a</i> <sub>N(3)</sub>       | 4.16                        | 4.23               | 4.28            | 4.31                         | 4.25                         | 4.09             | 4.20           | 4.22            | 4.22            | 4.20              |
| <i>a</i> <sub>H(4)</sub>       | -0.49                       | -0.59              | -0.69           | -0.73                        | -0.63                        | -0.39            | -0.53          | -0.56           | -0.57           | -0.56             |
| <i>a</i> <sub>H(5)</sub>       | -0.92                       | -0.85              | -0.73           | -0.70                        | -0.78                        | -0.93            | -0.83          | -0.81           | -0.81           | -0.88             |
| <i>a</i> <sub>H(6)</sub>       | -0.80                       | -0.95              | -1.09           | -1.15                        | -1.00                        | -0.68            | -0.88          | -0.92           | -0.93           | -0.92             |
| <i>a</i> <sub>H(8)</sub>       | 1.05                        | 0.95               | 0.92            | 0.85                         | 0.96                         | 1.11             | 1.03           | 1.02            | 1.02            | 0.96              |
| <i>a</i> <sub>H(9)</sub>       | -2.43                       | -2.17              | -2.22           | -2.05                        | -2.29                        | -2.85            | -2.60          | -2.52           | -2.51           | -2.19             |
| <i>a</i> <sub>H(10)</sub>      | 1.11                        | –                  | –               | –                            | –                            | –                | –              | –               | –               | –                 |
| <i>a</i> <sub>H(11)</sub>      | -2.46                       | -2.60              | -2.68           | -2.74                        | -2.59                        | -2.05            | -2.39          | -2.52           | -2.55           | -2.53             |
| <i>a</i> <sub>H(2-o) avg</sub> | 0.52                        | 0.54               | 0.57            | 0.58                         | 0.56                         | 0.50             | 0.54           | 0.55            | 0.55            | 0.54              |
| <i>a</i> <sub>H(2-m) avg</sub> | -0.31                       | -0.32              | -0.34           | -0.34                        | -0.33                        | -0.31            | -0.32          | -0.32           | -0.32           | -0.32             |
| <i>a</i> <sub>H(2-p)</sub>     | 0.44                        | 0.46               | 0.49            | 0.50                         | 0.48                         | 0.42             | 0.46           | 0.46            | 0.46            | 0.46              |
| <i>a</i> <sub>N</sub>          | –                           | –                  | -0.12           | 0.21                         | –                            | –                | –              | –               | –               | –                 |
| <i>a</i> <sub>F</sub>          |                             |                    |                 |                              | -1.00<br>avg                 | –                | -2.63          | –               | –               |                   |
|                                |                             |                    |                 |                              |                              |                  |                |                 |                 |                   |

<sup>a</sup> CAM-B3LYP/EPR-III // B3LYP/6-31G(2d,p) in benzene dielectric medium.

**Table S5. Continues**

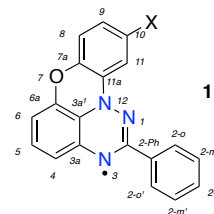

| <i>hfcc</i><br>/G         | <b>1l</b> <sup>b</sup><br>NH <sub>2</sub> | <b>1m</b> <sup>b</sup><br>NHAc | <b>1n</b><br>I | <b>1o</b><br>OH | <b>1p</b><br>OBn | <b>1q</b><br>Ph | <b>1r</b><br>Thioph | <b>1s</b><br>PhCC | <b>1t</b><br>OAc | <b>1u</b><br>NH<br>COCF <sub>3</sub> | <b>1v</b><br>NH<br>CO <sub>2</sub> Me |
|---------------------------|-------------------------------------------|--------------------------------|----------------|-----------------|------------------|-----------------|---------------------|-------------------|------------------|--------------------------------------|---------------------------------------|
| a <sub>N(12)</sub>        | 6.16                                      | 6.09                           | 5.86           | 6.07            | 6.17             | 6.12            | 6.06                | 6.00              | 6.00             | 5.86                                 | 6.06                                  |
| a <sub>N(1)</sub>         | 3.84                                      | 3.94                           | 4.08           | 3.92            | 3.87             | 3.96            | 3.99                | 4.03              | 4.01             | 4.09                                 | 3.95                                  |
| a <sub>N(3)</sub>         | 4.10                                      | 4.14                           | 4.22           | 4.12            | 4.09             | 4.17            | 4.18                | 4.20              | 4.18             | 4.19                                 | 4.14                                  |
| a <sub>H(4)</sub>         | -0.39                                     | -0.44                          | -0.56          | -0.41           | -0.39            | -0.49           | -0.51               | -0.55             | -0.50            | -0.53                                | -0.44                                 |
| a <sub>H(5)</sub>         | -0.95                                     | -0.94                          | -0.83          | -0.92           | -0.93            | -0.91           | -0.89               | -0.86             | -0.88            | -0.85                                | -0.92                                 |
| a <sub>H(6)</sub>         | -0.67                                     | -0.76                          | -0.92          | -0.73           | -0.69            | -0.81           | -0.84               | -0.89             | -0.83            | -0.89                                | -0.77                                 |
| a <sub>H(8)</sub>         | 1.08                                      | 1.03                           | 1.02           | 1.08            | 1.11             | 1.05            | 1.04                | 1.04              | 1.05             | 0.99                                 | 1.04                                  |
| a <sub>H(9)</sub>         | -2.77                                     | -2.60                          | -2.50          | -2.76           | -2.85            | -2.45           | -2.46               | -2.44             | -2.51            | -2.50                                | -2.63                                 |
| a <sub>H(10)</sub>        | -                                         | -                              | -              | -               | -                | -               | -                   | -                 | -                | -                                    | -                                     |
| a <sub>H(11)</sub>        | -2.15                                     | -2.31                          | -2.56          | -2.14           | -2.05            | -2.45           | -2.51               | -2.58             | -2.40            | -2.43                                | -2.30                                 |
| a <sub>H(2-o) avrg</sub>  | 0.50                                      | 0.52                           | 0.55           | 0.52            | 0.51             | 0.52            | 0.52                | 0.53              | 0.50             | 0.55                                 | 0.52                                  |
| a <sub>H(2-m)avrg</sub>   | -0.30                                     | -0.31                          | -0.32          | -0.30           | -0.30            | -0.31           | -0.31               | -0.31             | -0.29            | -0.32                                | -0.31                                 |
| a <sub>H(2-p)</sub>       | 0.42                                      | 0.44                           | 0.46           | 0.43            | 0.42             | 0.44            | 0.44                | 0.45              | 0.45             | 0.46                                 | 0.44                                  |
| a <sub>N</sub>            | -0.35                                     | 0.05                           | -              | -               | -                | -               | -                   | -                 | -                | 0.13                                 | 0.04                                  |
| a <sub>H(10-o) avrg</sub> |                                           |                                | -              |                 |                  | 0.18            | 0.33                | 0.13              |                  | -                                    | -                                     |
| a <sub>H(10-m)avrg</sub>  |                                           |                                | -              |                 |                  | -0.09           | -0.10               | -0.07             |                  | -                                    | -                                     |
| a <sub>H(10-p)</sub>      |                                           |                                | -              |                 |                  | 0.16            | 0.21                | 0.14              |                  | -                                    | -                                     |

<sup>a</sup> CAM-B3LYP/EPR-III // B3LYP/6-31G(2d,p) in benzene dielectric medium.

**Table S6.** DFT calculated spin densities for radicals in series **1**.<sup>a</sup>

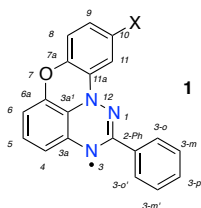

| Spin density                 | <b>1a</b><br>H | <b>1b</b><br>COOMe | <b>1c</b><br>CN | <b>1d</b><br>NO <sub>2</sub> | <b>1e</b><br>CF <sub>3</sub> | <b>1f</b><br>OMe | <b>1g</b><br>F | <b>1h</b><br>Cl | <b>1k</b><br>Br | <b>1j</b><br>Ac |
|------------------------------|----------------|--------------------|-----------------|------------------------------|------------------------------|------------------|----------------|-----------------|-----------------|-----------------|
| $\rho_{N(12)}$               | 0.241          | 0.233              | 0.225           | 0.221                        | 0.228                        | 0.241            | 0.231          | 0.231           | 0.230           | 0.235           |
| $\rho_{N(1)}$                | 0.280          | 0.290              | 0.298           | 0.302                        | 0.295                        | 0.273            | 0.286          | 0.287           | 0.288           | 0.288           |
| $\rho_{C(2)}$                | -0.056         | -0.058             | -0.065          | -0.064                       | -0.064                       | -0.056           | -0.060         | -0.061          | -0.058          | -0.060          |
| $\rho_{N(3)}$                | 0.280          | 0.285              | 0.289           | 0.291                        | 0.286                        | 0.275            | 0.283          | 0.284           | 0.284           | 0.283           |
| $\rho_{C(3a)}$               | 0.014          | 0.014              | 0.012           | 0.008                        | 0.013                        | 0.017            | 0.012          | 0.012           | 0.010           | 0.016           |
| $\rho_{C(4)}$                | 0.004          | 0.008              | 0.011           | 0.014                        | 0.009                        | -0.001           | 0.006          | 0.008           | 0.009           | 0.006           |
| $\rho_{C(5)}$                | 0.029          | 0.027              | 0.022           | 0.022                        | 0.025                        | 0.031            | 0.026          | 0.026           | 0.026           | 0.028           |
| $\rho_{C(6)}$                | 0.020          | 0.026              | 0.032           | 0.034                        | 0.029                        | 0.016            | 0.023          | 0.025           | 0.025           | 0.025           |
| $\rho_{C(6a)}$               | 0.027          | 0.022              | 0.017           | 0.015                        | 0.018                        | 0.028            | 0.022          | 0.022           | 0.020           | 0.023           |
| $\rho_{C(3a')}$              | 0.073          | 0.071              | 0.077           | 0.076                        | 0.076                        | 0.078            | 0.080          | 0.078           | 0.075           | 0.073           |
| $\rho_{O(7)}$                | 0.027          | 0.026              | 0.024           | 0.023                        | 0.025                        | 0.031            | 0.027          | 0.026           | 0.026           | 0.026           |
| $\rho_{C(7a)}$               | 0.087          | 0.080              | 0.080           | 0.073                        | 0.080                        | 0.107            | 0.091          | 0.089           | 0.090           | 0.082           |
| $\rho_{C(8)}$                | -0.053         | -0.045             | -0.043          | -0.041                       | -0.046                       | -0.054           | -0.052         | -0.050          | -0.050          | -0.047          |
| $\rho_{C(9)}$                | 0.089          | 0.077              | 0.076           | 0.069                        | 0.081                        | 0.102            | 0.096          | 0.090           | 0.087           | 0.076           |
| $\rho_{C(10)}$               | -0.047         | -0.038             | -0.040          | -0.035                       | -0.044                       | -0.045           | -0.047         | -0.046          | -0.044          | -0.036          |
| $\rho_{C(11)}$               | 0.082          | 0.076              | 0.087           | 0.083                        | 0.078                        | 0.062            | 0.077          | 0.081           | 0.084           | 0.077           |
| $\rho_{C(11a)}$              | -0.065         | -0.056             | -0.062          | -0.056                       | -0.060                       | -0.070           | -0.068         | -0.068          | -0.067          | -0.059          |
| $\rho_{C(2-Ph)}$             | 0.006          | 0.007              | 0.008           | 0.008                        | 0.007                        | 0.006            | 0.007          | 0.008           | 0.007           | 0.006           |
| $\rho_{C(2-o) \text{ avrg}}$ | -0.022         | -0.023             | -0.024          | -0.024                       | -0.023                       | -0.021           | -0.023         | -0.023          | -0.024          | -0.023          |
| $\rho_{C(2-m) \text{ avrg}}$ | 0.011          | 0.013              | 0.013           | 0.013                        | 0.012                        | 0.011            | 0.012          | 0.012           | 0.013           | 0.012           |
| $\rho_{C(2-p)}$              | -0.018         | -0.019             | -0.020          | -0.020                       | -0.019                       | -0.017           | -0.018         | -0.019          | -0.019          | -0.018          |
| $\rho_x^b$                   |                | 0.001<br>(C)       | -0.014<br>(N)   | 0.005<br>(N)                 | 0.003<br>(CF <sub>3</sub> )  | -0.003<br>(O)    | -0.001<br>(F)  | -0.002<br>(Cl)  | -               | 0.004<br>(C=O)  |

<sup>a</sup> CAM-B3LYP/EPR-III // B3LYP/6-31G(2d,p) in benzene dielectric medium. Densities on the hydrogen atoms summed up to the adjacent carbon atoms. <sup>b</sup> Density of atom at the C(10) position.

**Table S6.** Continuation

| Spin density           | <b>1l</b><br>NH <sub>2</sub> | <b>1m</b><br>NHAc | <b>1n</b><br>I | <b>1o</b><br>OH | <b>1p</b><br>OBn | <b>1q</b><br>Ph | <b>1r</b><br>Thioph | <b>1s</b><br>CCPh | <b>1t</b><br>OAc | <b>1u</b><br>NH<br>COCF <sub>3</sub> | <b>1v</b><br>NH<br>CO <sub>2</sub> Me |
|------------------------|------------------------------|-------------------|----------------|-----------------|------------------|-----------------|---------------------|-------------------|------------------|--------------------------------------|---------------------------------------|
| $\rho_{N(12)}$         | 0.240                        | 0.237             | 0.232          | 0.238           | 0.240            | 0.237           | 0.236               | 0.236             | 0.234            | 0.230                                | 0.236                                 |
| $\rho_{N(1)}$          | 0.274                        | 0.281             | 0.287          | 0.277           | 0.272            | 0.282           | 0.284               | 0.285             | 0.284            | 0.289                                | 0.281                                 |
| $\rho_{C(2)}$          | -0.058                       | -0.058            | -0.058         | -0.056          | -0.061           | -0.060          | -0.061              | -0.058            | -0.060           | -0.060                               | -0.057                                |
| $\rho_{N(3)}$          | 0.276                        | 0.278             | 0.284          | 0.277           | 0.276            | 0.280           | 0.281               | 0.283             | 0.281            | 0.283                                | 0.278                                 |
| $\rho_{C(3a)}$         | 0.017                        | 0.018             | 0.011          | 0.014           | 0.018            | 0.017           | 0.017               | 0.014             | 0.016            | 0.015                                | 0.016                                 |
| $\rho_{C(4)}$          | 0.001                        | 0.000             | 0.008          | 0.002           | 0.001            | 0.002           | 0.003               | 0.004             | 0.004            | 0.002                                | 0.002                                 |
| $\rho_{C(5)}$          | 0.033                        | 0.031             | 0.027          | 0.031           | 0.032            | 0.030           | 0.029               | 0.028             | 0.028            | 0.027                                | 0.032                                 |
| $\rho_{C(6)}$          | 0.015                        | 0.019             | 0.025          | 0.018           | 0.016            | 0.021           | 0.022               | 0.025             | 0.022            | 0.024                                | 0.019                                 |
| $\rho_{C(6a)}$         | 0.027                        | 0.023             | 0.021          | 0.026           | 0.026            | 0.025           | 0.024               | 0.024             | 0.023            | 0.020                                | 0.023                                 |
| $\rho_{C(3a')}$        | 0.077                        | 0.074             | 0.077          | 0.080           | 0.076            | 0.072           | 0.073               | 0.074             | 0.076            | 0.076                                | 0.077                                 |
| $\rho_{O(7)}$          | 0.029                        | 0.028             | 0.026          | 0.029           | 0.031            | 0.027           | 0.027               | 0.027             | 0.027            | 0.026                                | 0.028                                 |
| $\rho_{C(7a)}$         | 0.101                        | 0.094             | 0.088          | 0.101           | 0.105            | 0.087           | 0.088               | 0.089             | 0.091            | 0.088                                | 0.092                                 |
| $\rho_{C(8)}$          | -0.056                       | -0.049            | -0.050         | -0.056          | -0.054           | -0.049          | -0.049              | -0.049            | -0.049           | -0.047                               | -0.049                                |
| $\rho_{C(9)}$          | 0.105                        | 0.090             | 0.086          | 0.098           | 0.104            | 0.091           | 0.090               | 0.086             | 0.091            | 0.085                                | 0.090                                 |
| $\rho_{C(10)}$         | -0.045                       | -0.036            | -0.045         | -0.044          | -0.046           | -0.043          | -0.041              | -0.041            | -0.045           | -0.035                               | -0.039                                |
| $\rho_{C(11)}$         | 0.067                        | 0.070             | 0.085          | 0.071           | 0.057            | 0.071           | 0.074               | 0.081             | 0.074            | 0.074                                | 0.070                                 |
| $\rho_{C(11a)}$        | -0.067                       | -0.063            | -0.068         | -0.071          | -0.065           | -0.058          | -0.058              | -0.064            | -0.063           | -0.061                               | -0.065                                |
| $\rho_{C(2-Ph)}$       | 0.006                        | 0.007             | 0.007          | 0.007           | 0.005            | 0.006           | 0.006               | 0.006             | 0.007            | 0.007                                | 0.006                                 |
| $\rho_{C(2-o)}$<br>avg | -0.022                       | -0.022            | -0.023         | -0.023          | -0.020           | -0.022          | -0.022              | -0.022            | -0.022           | -0.022                               | -0.022                                |
| $\rho_{C(2-m)}$<br>avg | 0.011                        | 0.012             | 0.012          | 0.012           | 0.012            | 0.019           | 0.012               | 0.011             | 0.011            | 0.011                                | 0.011                                 |
| $\rho_{C(2-p)}$        | -0.017                       | -0.018            | -0.018         | -0.017          | -0.017           | -0.018          | -0.018              | -0.018            | -0.018           | -0.018                               | -0.017                                |
| $\rho_x^b$             | -0.005<br>(N)                | 0.0002<br>(N)     | -              | -0.004<br>(O)   | -0.001<br>(O)    | 0.008<br>(C)    | 0.012<br>(C)        | 0.014<br>(C)      | 0.001<br>(O)     | 0.005<br>(N)                         | 0.001<br>(N)                          |

<sup>a</sup> CAM-B3LYP/EPR-III // B3LYP/6-31G(2d,p) in benzene dielectric medium. Densities on the hydrogen atoms summed up to the adjacent carbon atoms. <sup>b</sup> Density of the atom at the C(10) position.

### c) spin delocalization

Spin delocalization parameter RDV (Radical Delocalization Value) was calculated according to the formula Eq S1:<sup>20</sup>

$$RDV = \sum_{i=1}^n (\rho_i)^2 \quad \text{eq S1}$$

where spin concentration  $\rho_i$  on each heavy atoms  $i$  (hydrogen atoms summed up to heavy atoms) is obtained with the CAM-B3LYP/EPR-III // UB3LYP/6-31G(2d,p) method in benzene dielectric medium using the PCM model<sup>19</sup> [keywords: SCRF(Solvent=benzene)].

For the purpose of this work, the inverse is reported:  $RDV^{-1} = 1/RDV$ , since now the larger value corresponds to the greater delocalization. A graphical correlation of the calculated  $RDV^{-1}$  values with the  $\sigma_m$  substituent parameters is shown in Figure S40.

### d) N–H bond dissociation energy and resonance stabilization

The N–H bond dissociation enthalpy (BDE) in the *leuco* form (**1-leuco**) of the radicals was calculated at the (U)B3LYP/6-311++G(2d,p) // (U)B3LYP/6-31G(2d,p) level of theory in benzene dielectric medium (requested with the SCRF(Solvent=benzene) keyword; PCM model<sup>19</sup>) as a change of enthalpy  $\Delta H$  in an isodesmic reaction with the structurally similar phenoxazin-10-yl radical (Scheme S1) and referenced to the experimental C–H *BDE* of phenoxazine in benzene ( $77.2 \pm 0.3$  kcal mol<sup>-1</sup>).<sup>21</sup> The thermodynamic parameters for radicals **1**, *leuco* forms **1-leuco**, phenoxazin-10-yl and phenoxazine in benzene were obtained at the (U)B3LYP/6-31G(2d,p) level of theory in vacuum, as described above. Results are shown in Table S7.

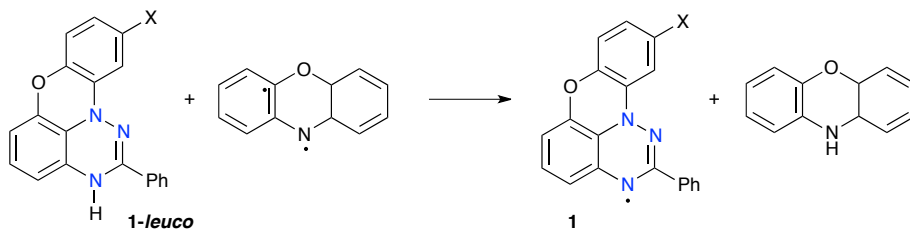

**Scheme S1.** Isodesmic reaction to calculate the N–H BDE in **1-leuco**.

Resonance stabilization energy (RSE, Table S7) was obtained by comparing BDE in **1-leuco** to that in CH<sub>3</sub>-H (104.9 kcal mol<sup>-1</sup>)<sup>22</sup> in vacuum according to formula Eq S2.

$$\text{RSE} = \text{BDE}_{\text{CH}_4} - \text{BDE}_{\mathbf{1}\text{-leuco}} \quad \text{eq S2}$$

*e) oxidation potentials for radicals 1*

The oxidation potential  $E_{1/2}^{0/+1}$  for radicals **1** was calculated at the (U)B3LYP/6-31++G(2d,p) // (U)B3LYP/6-31G(2d,p) level of theory in CH<sub>2</sub>Cl<sub>2</sub> dielectric medium (single point calculations) using the following process and equation S3:

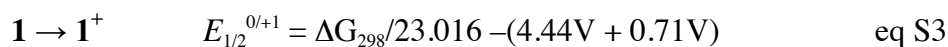

where  $\Delta G_{298}$  is the free energy change in kcal mol<sup>-1</sup>, 23.016 is conversion of kcal mol<sup>-1</sup> to eV, 4.44±0.02 V is the absolute potential of standard H<sup>+</sup>/H electrode, (SHE),<sup>23</sup> and 0.71 V is the relative standard potential of the Fc/Fc<sup>+</sup> electrode (vs SHE).

Thermodynamic corrections were obtained at the (U)B3LYP/6-31G(2d,p) level of theory in vacuum. The results are shown in Table S7.



**Table S7.** Bond dissociation enthalpy (BDE) for **1-leuco**, resonance stabilization energy (*RSE*) and radical delocalization value (RDV) in radicals **1**, and oxidation potential  $E_{1/2}^{0/+1}$  for **1** vs SCE.

| <b>1-leuco</b>                                                                               | <i>BDE</i> in <b>1-leuco</b> <sup>a</sup><br>/kcal mol <sup>-1</sup> | <i>RSE</i> in <b>1</b> <sup>a</sup><br>/kcal mol <sup>-1</sup> | <i>RDV</i> <sup>1</sup> in <b>1</b> <sup>b</sup><br>/1 | $E_{1/2}^{0/+1}$ in <b>1</b> <sup>c</sup><br>/V |
|----------------------------------------------------------------------------------------------|----------------------------------------------------------------------|----------------------------------------------------------------|--------------------------------------------------------|-------------------------------------------------|
| 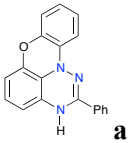 <b>a</b>   | 68.521                                                               | 36.38                                                          | 3.8579                                                 | -0.331                                          |
|  <b>b</b>   | 69.262                                                               | 35.64                                                          | 3.8915                                                 | -0.244                                          |
|  <b>c</b>   | 70.561                                                               | 34.34                                                          | 3.7796                                                 | -0.143                                          |
|  <b>d</b>  | 70.865                                                               | 34.04                                                          | 3.8123                                                 | -0.088                                          |
|  <b>e</b> | 70.051                                                               | 34.85                                                          | 3.8216                                                 | -0.192                                          |
|  <b>f</b> | 68.114                                                               | 36.79                                                          | 3.8795                                                 | -0.377                                          |
|  <b>g</b> | 69.352                                                               | 35.55                                                          | 3.8038                                                 | -0.245                                          |

<sup>a</sup> Obtained at the (U)B3LYP/6-31G(2d,p) level of theory in vacuum. <sup>b</sup> Obtained at CAM-B3LYP/EPR-III // B3LYP/6-31G(2d,p) in benzene dielectric medium. <sup>c</sup> Obtained at (U)B3LYP/6-31++G(2d,p) // (U)B3LYP/6-31G(2d,p) level of theory in CH<sub>2</sub>Cl<sub>2</sub> dielectric medium using eq S3.

**Table S7. Continues.**

| <b>1-leuco</b>                                                                               | <i>BDE</i> in<br><b>1-leuco</b> <sup>a</sup><br>/kcal mol <sup>-1</sup> | <i>RSE</i> in <b>1</b> <sup>a</sup><br>/kcal mol <sup>-1</sup> | <i>RDV</i> <sup>-1</sup> in <b>1</b> <sup>b</sup><br>/1 | <i>E</i> <sub>1/2</sub> <sup>0/+1</sup> in <b>1</b> <sup>c</sup><br>/V |
|----------------------------------------------------------------------------------------------|-------------------------------------------------------------------------|----------------------------------------------------------------|---------------------------------------------------------|------------------------------------------------------------------------|
| 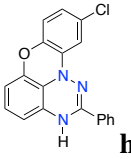 <b>h</b>   | 69.545                                                                  | 35.36                                                          | 3.8051                                                  | -0.234                                                                 |
|  <b>i</b>   | 69.502                                                                  | 35.40                                                          | 3.8221                                                  | -0.246                                                                 |
|  <b>j</b>   | 69.389                                                                  | 35.51                                                          | 3.8906                                                  | -0.235                                                                 |
|  <b>l</b>  | 67.913                                                                  | 36.99                                                          | 3.8763                                                  | -0.447                                                                 |
|  <b>m</b> | 68.742                                                                  | 36.16                                                          | 3.9221                                                  | -0.309                                                                 |
|  <b>n</b> | 69.494                                                                  | 35.41                                                          | 3.8180                                                  | -0.253                                                                 |
|  <b>o</b> | 68.343                                                                  | 36.47                                                          | 3.8590                                                  | —                                                                      |

<sup>a</sup> Obtained at the (U)B3LYP/6-31G(2d,p) level of theory in vacuum. <sup>b</sup> Obtained at CAM-B3LYP/EPR-III // B3LYP/6-31G(2d,p) in benzene dielectric medium. <sup>c</sup> Obtained at (U)B3LYP/6-31++G(2d,p) // (U)B3LYP/6-31G(2d,p) level of theory in CH<sub>2</sub>Cl<sub>2</sub> dielectric medium using eq S3.

**Table S7. Continues.**

| <b>1-leuco</b>                                                                                  | <i>BDE</i> in <b>1-leuco</b> <sup>a</sup><br>/kcal mol <sup>-1</sup> | <i>RSE</i> in <b>1</b> <sup>a</sup><br>/kcal mol <sup>-1</sup> | <i>RDV</i> <sup>-1</sup> in <b>1</b> <sup>b</sup><br>/1 | <i>E</i> <sub>1/2</sub> <sup>0/+1</sup> in <b>1</b> <sup>c</sup><br>/V |
|-------------------------------------------------------------------------------------------------|----------------------------------------------------------------------|----------------------------------------------------------------|---------------------------------------------------------|------------------------------------------------------------------------|
| 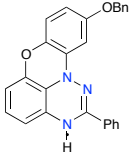<br><b>p</b>   | 68.156                                                               | 36.74                                                          | 3.9025                                                  | -0.418                                                                 |
| <br><b>q</b>   | 68.541                                                               | 36.36                                                          | 3.8948                                                  | -0.343                                                                 |
| <br><b>r</b>   | 68.686                                                               | 36.21                                                          | 3.8758                                                  | -0.331                                                                 |
| <br><b>s</b>  | 69.042                                                               | 35.86                                                          | 3.8346                                                  | -0.321                                                                 |
| <br><b>t</b> | 69.412                                                               | 35.49                                                          | 3.8626                                                  | —                                                                      |
| <br><b>u</b> | 69.696                                                               | 35.20                                                          | 3.8809                                                  | -0.193                                                                 |
| <br><b>v</b> | 68.619                                                               | 36.28                                                          | 3.9102                                                  | -0.324                                                                 |

<sup>a</sup> Obtained at the (U)B3LYP/6-31G(2d,p) level of theory in vacuum. <sup>b</sup> Obtained at CAM-B3LYP/EPR-III // B3LYP/6-31G(2d,p) in benzene dielectric medium. <sup>c</sup> Obtained at (U)B3LYP/6-31++G(2d,p) // (U)B3LYP/6-31G(2d,p) level of theory in CH<sub>2</sub>Cl<sub>2</sub> dielectric medium using eq S3.

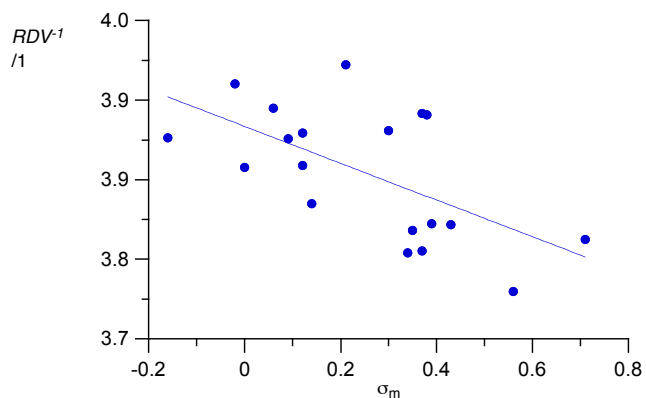

**Figure S40.** Inverse of Radical Delocalization Value ( $RDV$ )<sup>-1</sup> for series **1** vs Hammett substituent  $\sigma_m$  parameter. For data see Table S7.

### *f) electronic excitations*

Electronic excitation energies in  $\text{CH}_2\text{Cl}_2$  dielectric medium were obtained for selected derivatives **1** at the UCAM-B3LYP/6-31++G(2d,p) // UB3LYP/6-31G(2d,p) level of theory using the time-dependent TD-DFT method<sup>24</sup> supplied in the Gaussian 09 package. Solvation models in calculations were implemented with the PCM model<sup>19</sup> using the SCRF(solvent= $\text{CH}_2\text{Cl}_2$ ) keyword. Three lowest excitation energies, classified as  $\pi \rightarrow \pi^*$  transitions, and also energy of the  $n \rightarrow \pi^*$  transition are listed in Table S8. Energies of MOs involved in low energy transitions are listed in Table S9 and their correlations with the  $\sigma_m$  substituent parameters are shown in Figures S41 and S42.

**Table S8.** Calculated electronic transition energies and oscillator strength values with the indicated main electronic transition.<sup>a</sup>

| radical                         | $\pi \rightarrow \pi^*$<br>$\beta\text{-HOMO} \rightarrow$<br>$\beta\text{-LUMO}$<br>/nm ( <i>f</i> ) | $\pi \rightarrow \pi^*$<br>$\alpha\text{-HOMO} \rightarrow$<br>$\alpha\text{-LUMO}$<br>/nm ( <i>f</i> ) | $\pi \rightarrow \pi^*$<br>$\alpha\text{-HOMO} \rightarrow$<br>$\alpha\text{-LUMO}+1$<br>/nm ( <i>f</i> ) | $n \rightarrow \pi^*$<br>$\beta\text{-HOMO}-5 \rightarrow$<br>$\beta\text{-LUMO}$<br>/nm ( <i>f</i> ) |
|---------------------------------|-------------------------------------------------------------------------------------------------------|---------------------------------------------------------------------------------------------------------|-----------------------------------------------------------------------------------------------------------|-------------------------------------------------------------------------------------------------------|
| <b>Blatter</b>                  | 445.0 (0.040)                                                                                         | 515.9 (0.005)                                                                                           | 381.0 (0.010)                                                                                             | 387.7 (0.002)                                                                                         |
| <b>1a</b> , H                   | 541.2 (0.044)                                                                                         | 517.3 (0.032)                                                                                           | 411.8 (0.017)                                                                                             | 371.7 (0.001)                                                                                         |
| <b>1b</b> , CO <sub>2</sub> Me  | 537.8 (0.035)                                                                                         | 517.4 (0.038) <sup>b</sup>                                                                              | 442.1 (0.012)                                                                                             | 376.5 (0.001)                                                                                         |
| <b>1c</b> , CN                  | 538.2 (0.043)                                                                                         | 514.5 (0.024)                                                                                           | 446.1 (0.017)                                                                                             | 381.8 (0.001)                                                                                         |
| <b>1d</b> , NO <sub>2</sub>     | 534.1 (0.060)                                                                                         | 563.6 (0.002)                                                                                           | 481.0 (0.017)                                                                                             | 383.8 (0.001)                                                                                         |
| <b>1e</b> , CF <sub>3</sub>     | 538.5 (0.044)                                                                                         | 510.2 (0.024)                                                                                           | 422.3 (0.021)                                                                                             | 378.9 (0.001)                                                                                         |
| <b>1f</b> , OMe                 | 563.9 (0.073)                                                                                         | 519.7 (0.012)                                                                                           | 418.0 (0.019)                                                                                             | 369.4 (0.001)                                                                                         |
| <b>1g</b> , F                   | 550.0 (0.057)                                                                                         | 510.9 (0.016)                                                                                           | 412.9 (0.024)                                                                                             | 376.2 (0.001)                                                                                         |
| <b>1h</b> , Cl                  | 545.7 (0.056)                                                                                         | 511.8 (0.018)                                                                                           | 419.1 (0.022)                                                                                             | 377.2 (0.001)                                                                                         |
| <b>1i</b> , Br                  | 546.1 (0.056)                                                                                         | 512.7 (0.019)                                                                                           | 420.5 (0.022)                                                                                             | 377.4 (0.001)                                                                                         |
| <b>1j</b> , COMe                | 538.9 (0.032)                                                                                         | 521.7 (0.040) <sup>b</sup>                                                                              | 455.5 (0.013)                                                                                             | 375.5 (0.001)                                                                                         |
| <b>1l</b> , NH <sub>2</sub>     | 576.4 (0.080)                                                                                         | 521.8 (0.10)                                                                                            | 417.5 (0.014)                                                                                             | 369.3 (0.001)                                                                                         |
| <b>1m</b> , NHAc                | 557.2 (0.073)                                                                                         | 517.4 (0.016)                                                                                           | 416.0 (0.013)                                                                                             | 372.5 (0.001)                                                                                         |
| <b>1n</b> , I                   | 545.3 (0.056)                                                                                         | 513.8 (0.021)                                                                                           | 421.0 (0.022)                                                                                             | 377.1 (0.001)                                                                                         |
| <b>1o</b> , OH                  | 563.4 (0.071)                                                                                         | 516.9 (0.013)                                                                                           | 413.8 (0.018)                                                                                             | 371.5 (0.001)                                                                                         |
| <b>1p</b> , OBn                 | 563.4 (0.075)                                                                                         | 519.2 (0.012)                                                                                           | 418.3 (0.021)                                                                                             | 369.8 (0.001) <sup>c</sup>                                                                            |
| <b>1q</b> , Ph                  | 545.8 (0.063)                                                                                         | 519.7 (0.025)                                                                                           | 431.3 (0.016)                                                                                             | 372.8 (0.001)                                                                                         |
| <b>1r</b> , Thioph              | 548.7 (0.070)                                                                                         | 521.8 (0.017)                                                                                           | 473.2 (0.009) <sup>d</sup>                                                                                | 373.8 (0.001)                                                                                         |
| <b>1s</b> CCPh                  | 546.0 (0.076)                                                                                         | 525.2 (0.015)                                                                                           | 486.7 (0.014) <sup>d</sup>                                                                                | 375.2 (0.001)                                                                                         |
| <b>1t</b> , OAc                 | 546.5 (0.058)                                                                                         | 514.2 (0.020)                                                                                           | 415.0 (0.020)                                                                                             | 374.3 (0.001)                                                                                         |
| <b>1u</b> , NHCOCF <sub>3</sub> | 551.0 (0.067)                                                                                         | 513.4 (0.015)                                                                                           | 425.44 (0.013)                                                                                            | 376.4 (0.001)                                                                                         |
| <b>1v</b> , NHCOOMe             | 558.3 (0.074)                                                                                         | 516.8 (0.015)                                                                                           | 414.9 (0.014)                                                                                             | 372.7 (0.001)                                                                                         |

<sup>a</sup> Obtained with the TD CAM-B3LYP/6-31++G(2d,p)//UB3LYP/6-31G(2d,p) method in CH<sub>2</sub>Cl<sub>2</sub> dielectric medium. <sup>b</sup> Comparable contribution from  $\beta\text{-HOMO} \rightarrow \beta\text{-LUMO}$  transition. <sup>c</sup> Main contribution from  $\beta\text{-HOMO}-7 \rightarrow \beta\text{-LUMO}$  transition. <sup>d</sup> Several weak transitions.

**Table S9.** Energies of MOs involved in low energy transitions.<sup>a</sup>

| radical                          | $\alpha$ -HOMO, $\pi$<br>/eV | $\alpha$ -LUMO, $\pi^*$<br>/eV | $\alpha$ -LUMO+1, $\pi^*$<br>/eV | $\beta$ -HOMO-5, n<br>/eV | $\beta$ -HOMO, $\pi^*$<br>/eV | $\beta$ -LUMO, $\pi^*$<br>/eV |
|----------------------------------|------------------------------|--------------------------------|----------------------------------|---------------------------|-------------------------------|-------------------------------|
| <b>Blatter</b>                   | -6.243                       | -0.468                         | 0.201                            | -9.026                    | -7.648                        | -1.694                        |
| <b>1a</b> , H                    | -6.209                       | -0.607                         | 0.111                            | -9.076                    | -7.211                        | -1.834                        |
| <b>1b</b> , CO <sub>2</sub> Me   | -6.315                       | -0.779                         | -0.531                           | -9.147                    | -7.337                        | -1.927                        |
| <b>1c</b> , CN                   | -6.415                       | -0.850                         | -0.597                           | -9.263                    | -7.420                        | -2.031                        |
| <b>1d</b> , NO <sub>2</sub>      | -6.446                       | -1.801                         | -0.715                           | -9.362                    | -7.471                        | -2.077                        |
| <b>1e</b> , CF <sub>3</sub>      | -6.359                       | -0.702                         | -0.228                           | -9.238                    | -7.375                        | -1.974                        |
| <b>1f</b> , OMe                  | -6.176                       | -0.595                         | 0.221                            | -9.073                    | -7.000                        | -1.838                        |
| <b>1g</b> , F                    | -6.298                       | -0.652                         | 0.042                            | -9.137                    | -7.234                        | -1.937                        |
| <b>1h</b> , Cl                   | -6.316                       | -0.671                         | -0.057                           | -9.147                    | -7.267                        | -1.948                        |
| <b>1i</b> , Br                   | -6.317                       | -0.675                         | -0.076                           | -9.145                    | -7.266                        | -1.949                        |
| <b>1j</b> , COMe                 | -6.317                       | -0.912                         | -0.603                           | -9.119                    | -7.335                        | -1.932                        |
| <b>1l</b> , NH <sub>2</sub>      | -6.130                       | -0.571                         | 0.239                            | -9.041                    | -6.821                        | -1.806                        |
| <b>1m</b> , NHAc                 | -6.227                       | -0.630                         | 0.069                            | -9.102                    | -7.050                        | -1.878                        |
| <b>1n</b> , I                    | -6.304                       | -0.671                         | -0.079                           | -9.043                    | -7.246                        | -1.938                        |
| <b>1o</b> , OH                   | -6.211                       | -0.613                         | 0.157                            | -9.091                    | -7.042                        | -1.870                        |
| <b>1p</b> , OBn                  | -6.184                       | -0.601                         | 0.127                            | -8.606                    | -7.015                        | -1.847                        |
| <b>1q</b> , Ph                   | -6.215                       | -0.630                         | -0.216                           | -8.820                    | -7.115                        | -1.854                        |
| <b>1r</b> , Thioph               | -6.231                       | -0.666                         | -0.402                           | -8.872                    | -7.032                        | -1.877                        |
| <b>1s</b> , CCPh                 | -6.257                       | -0.794                         | -0.567                           | -8.921                    | -7.049                        | -1.899                        |
| <b>1t</b> , OAc                  | -6.266                       | -0.639                         | 0.018                            | -9.118                    | -7.216                        | -1.898                        |
| <b>1u</b> , NHCOCF <sub>3</sub>  | -6.266                       | -0.696                         | -0.346                           | -9.158                    | -7.206                        | -1.956                        |
| <b>1v</b> , NHCO <sub>2</sub> Me | -6.227                       | -0.626                         | 0.102                            | -9.103                    | -7.045                        | -1.879                        |

<sup>a</sup> Obtained with the TD CAM-B3LYP/6-31++G(2d,p)// UB3LYP/6-31G(2d,p) method in CH<sub>2</sub>Cl<sub>2</sub> dielectric medium.

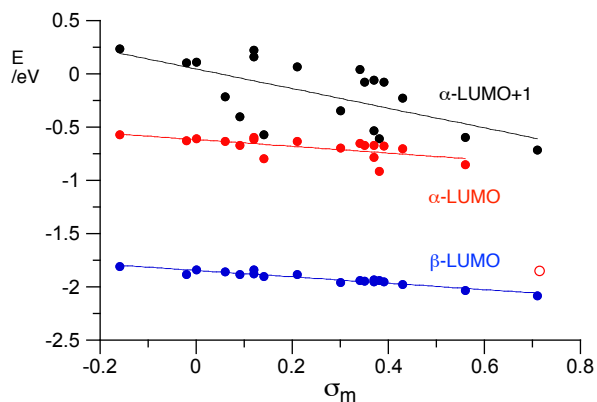

**Figure S41.** Correlation of TD-DFT calculated energies of the lowest unoccupied MOs for radicals **1**. Best fitting lines:  $E_{\beta\text{-LUMO}} = -1.841(8) - 0.30(2) \times \sigma_m$ ,  $r^2 = 0.907$  (blue);  $E_{\alpha\text{-LUMO}} = -0.614(27) - 0.32(9) \times \sigma_m$ ,  $r^2 = 0.43$  (red, data for  $\text{NO}_2$  shown as an open circle is omitted);  $E_{\alpha\text{-LUMO}+1} = -0.05(9) - 0.92(27) \times \sigma_m$ ,  $r^2 = 0.40$  (black).

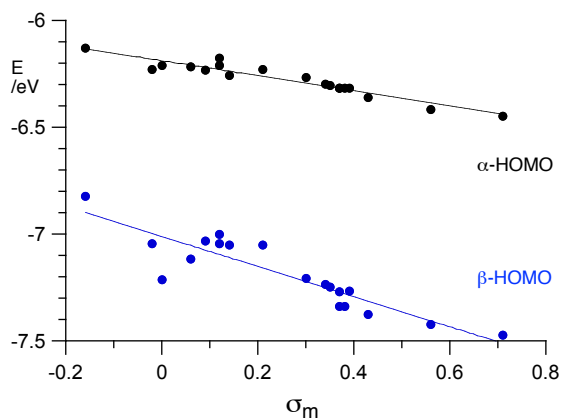

**Figure S42.** Correlation of TD-DFT calculated energies of the highest occupied MOs for radicals **1**. Best fitting lines:  $E_{\beta\text{-HOMO}} = -7.009(27) - 0.70(8) \times \sigma_m$ ,  $r^2 = 0.814$  (blue);  $E_{\alpha\text{-HOMO}} = -6.187(9) - 0.352(27) \times \sigma_m$ ,  $r^2 = 0.912$  (black).

### *g) partial output data for TD-DFT calculations*

```
CAM-B3LYP/6-31++G(2d,p) TD(NStates=20) SCF=tight Geom(NoAngle, noDistance,
check)
#P guess=check SCRF(Solvent=CH2Cl2)
```

**1a** (X=H)

```
Excited State 1: 2.293-A' 2.2907 eV 541.24 nm f=0.0437
<S**2>=1.064
```

```
77A -> 79A -0.15220
77A -> 80A 0.10520
78A -> 79A 0.43813
77B -> 78B 0.80918
77B -> 79B 0.10044
```

```
This state for optimization and/or second-order correction.
Total Energy, E(TD-HF/TD-KS) = -970.177418364
```

Excited State 2: 2.087-A' 2.3968 eV 517.29 nm f=0.0316  
<S\*\*2>=0.839

|            |          |
|------------|----------|
| 78A -> 79A | 0.78218  |
| 78A -> 80A | 0.18315  |
| 78A -> 88A | 0.17780  |
| 76B -> 78B | 0.13152  |
| 77B -> 78B | -0.46833 |

Excited State 3: 2.690-A' 3.0111 eV 411.76 nm f=0.0171  
<S\*\*2>=1.560

|            |          |
|------------|----------|
| 73A -> 92A | 0.16265  |
| 74A -> 82A | 0.17206  |
| 76A -> 79A | -0.10891 |
| 77A -> 80A | 0.23405  |
| 78A -> 79A | -0.20845 |
| 78A -> 80A | 0.74206  |
| 73B -> 78B | 0.19866  |
| 73B -> 95B | 0.10485  |
| 74B -> 78B | -0.13790 |
| 74B -> 84B | 0.12343  |
| 76B -> 79B | 0.12583  |
| 77B -> 80B | -0.25241 |

Excited State 4: 3.361-A' 3.2326 eV 383.54 nm f=0.0086  
<S\*\*2>=2.575

|            |          |
|------------|----------|
| 75A -> 85A | 0.28227  |
| 76A -> 79A | -0.36730 |
| 76A -> 88A | 0.18967  |
| 77A -> 79A | -0.33056 |
| 78A -> 80A | -0.13435 |
| 78A -> 88A | 0.10495  |
| 71B -> 89B | -0.11300 |
| 75B -> 84B | -0.16462 |
| 75B -> 85B | -0.22363 |
| 76B -> 78B | 0.19985  |
| 76B -> 79B | 0.36660  |
| 76B -> 89B | -0.20091 |
| 77B -> 78B | -0.15100 |
| 77B -> 79B | 0.38609  |

Excited State 5: 2.096-A'' 3.3352 eV 371.74 nm f=0.0014  
<S\*\*2>=0.848

|            |          |
|------------|----------|
| 72B -> 78B | 0.96233  |
| 72B -> 95B | -0.13389 |

### 1b (X=COOMe)

Excited State 1: 2.298-A' 2.3055 eV 537.77 nm f=0.0346  
<S\*\*2>=1.070

|            |          |
|------------|----------|
| 92A -> 95A | -0.16872 |
| 93A -> 94A | -0.46926 |
| 93A -> 95A | 0.26414  |
| 93A -> 96A | 0.10604  |
| 92B -> 93B | 0.73414  |

This state for optimization and/or second-order correction.  
Total Energy, E(TD-HF/TD-KS) = -1197.99406228



Copying the excited state density for this state as the 1-particle RhoCI density.

Excited State 2: 2.144-A' 2.3964 eV 517.38 nm f=0.0377  
<S\*\*2>=0.899  
93A -> 94A 0.69067  
93A -> 95A -0.20700  
93A -> 96A -0.16530  
93A ->103A -0.16141  
91B -> 93B -0.14570  
92B -> 93B 0.55989

Excited State 3: 2.663-A' 2.8046 eV 442.07 nm f=0.0123  
<S\*\*2>=1.523  
88A -> 94A -0.12688  
89A -> 96A 0.13248  
91A -> 94A -0.13440  
92A -> 94A 0.21690  
92A -> 95A 0.16807  
93A -> 94A 0.18879  
93A -> 95A 0.74999  
93A -> 96A -0.17383  
87B -> 93B -0.12780  
87B -> 95B 0.13037  
89B -> 97B -0.11325  
91B -> 94B 0.12592  
92B -> 94B -0.15755  
92B -> 95B -0.18168

Excited State 4: 3.353-A' 3.2223 eV 384.77 nm f=0.0039  
<S\*\*2>=2.560  
90A ->100A -0.27317  
90A ->105A 0.10843  
91A -> 94A -0.24581  
91A -> 95A 0.26984  
91A ->103A -0.21685  
92A -> 94A -0.27290  
92A -> 95A 0.22912  
93A -> 94A -0.10747  
93A -> 96A -0.14161  
86B ->104B 0.11651  
90B ->100B -0.28187  
91B -> 93B -0.15493  
91B -> 94B 0.28428  
91B -> 95B -0.23782  
91B ->104B 0.20729  
92B -> 93B 0.16770  
92B -> 94B 0.32908  
92B -> 95B -0.22257

Excited State 5: 2.094-A'' 3.2935 eV 376.45 nm f=0.0014  
<S\*\*2>=0.847  
88B -> 93B 0.96081  
88B ->107B 0.14261

1c (X=CN)

Excited State 1: 2.303-A' 2.3036 eV 538.21 nm f=0.0431  
<S\*\*2>=1.076

|            |          |
|------------|----------|
| 83A -> 86A | 0.16703  |
| 84A -> 85A | -0.36688 |
| 84A -> 86A | -0.22716 |
| 80B -> 84B | 0.10880  |
| 83B -> 84B | 0.80432  |
| 83B -> 86B | -0.10394 |

This state for optimization and/or second-order correction.

Total Energy, E(TD-HF/TD-KS) = -1062.38566981

Excited State 2: 2.173-A' 2.4098 eV 514.50 nm f=0.0235  
<S\*\*2>=0.930

|            |          |
|------------|----------|
| 83A -> 86A | -0.10153 |
| 84A -> 85A | 0.75546  |
| 84A -> 86A | 0.20519  |
| 84A -> 87A | -0.19032 |
| 84A -> 92A | -0.16260 |
| 82B -> 84B | -0.15659 |
| 83B -> 84B | 0.44287  |

Excited State 3: 2.671-A' 2.7795 eV 446.07 nm f=0.0166  
<S\*\*2>=1.533

|            |          |
|------------|----------|
| 78A -> 95A | -0.10508 |
| 80A -> 85A | -0.10225 |
| 80A -> 87A | -0.12611 |
| 82A -> 85A | 0.13615  |
| 83A -> 85A | -0.22739 |
| 83A -> 86A | 0.15888  |
| 84A -> 85A | -0.15160 |
| 84A -> 86A | 0.76040  |
| 84A -> 87A | 0.12303  |
| 78B -> 84B | 0.13658  |
| 78B -> 86B | 0.11049  |
| 80B -> 87B | 0.12068  |
| 82B -> 85B | -0.13062 |
| 83B -> 84B | 0.10370  |
| 83B -> 85B | 0.16027  |
| 83B -> 86B | -0.18368 |

Excited State 4: 3.339-A' 3.2149 eV 385.65 nm f=0.0029  
<S\*\*2>=2.538

|            |          |
|------------|----------|
| 81A -> 91A | -0.25951 |
| 81A -> 95A | 0.11228  |
| 82A -> 85A | -0.21469 |
| 82A -> 86A | -0.25551 |
| 82A -> 92A | -0.21779 |
| 83A -> 85A | -0.27331 |
| 83A -> 86A | -0.24475 |
| 84A -> 85A | -0.11269 |
| 84A -> 87A | -0.18415 |
| 84A -> 92A | -0.10143 |
| 77B -> 95B | 0.11419  |
| 81B -> 91B | -0.27689 |
| 82B -> 84B | -0.14612 |
| 82B -> 85B | 0.26754  |

|            |         |
|------------|---------|
| 82B -> 86B | 0.23605 |
| 82B -> 95B | 0.20641 |
| 83B -> 84B | 0.16913 |
| 83B -> 85B | 0.33033 |
| 83B -> 86B | 0.23017 |

Excited State 5: 2.095-A" 3.2477 eV 381.76 nm f=0.0014  
 <S\*\*2>=0.847  
 79B -> 84B 0.95994  
 79B -> 96B 0.14870

**1d (X=NO<sub>2</sub>)**

Excited State 1: 2.374-A' 2.2001 eV 563.55 nm f=0.0023  
 <S\*\*2>=1.159  
 83A -> 90A -0.13524  
 88A -> 90A 0.17488  
 89A -> 90A 0.80011  
 89A -> 91A -0.36715  
 89A -> 92A -0.19590  
 89A -> 94A -0.13412  
 88B -> 90B -0.12815

This state for optimization and/or second-order correction.  
 Total Energy, E(TD-HF/TD-KS) = -1174.64073138  
 Copying the excited state density for this state as the 1-particle RhoCI density.

Excited State 2: 2.301-A' 2.3212 eV 534.14 nm f=0.0602  
 <S\*\*2>=1.074  
 88A -> 91A -0.13566  
 89A -> 90A 0.15794  
 89A -> 91A 0.22745  
 85B -> 89B 0.10112  
 88B -> 89B 0.85155  
 88B -> 90B -0.21441  
 88B -> 91B 0.11015

Excited State 3: 2.230-A' 2.5774 eV 481.04 nm f=0.0171  
 <S\*\*2>=0.994  
 83A -> 90A -0.10597  
 88A -> 90A 0.13764  
 89A -> 90A 0.29466  
 89A -> 91A 0.78688  
 89A -> 98A 0.16106  
 87B -> 89B 0.17138  
 88B -> 89B -0.29929

Excited State 4: 3.452-A' 2.8752 eV 431.21 nm f=0.0013  
 <S\*\*2>=2.729  
 80A -> 90A 0.65388  
 80A -> 94A 0.17075  
 80A ->104A -0.13269  
 84A -> 90A 0.15333  
 89A -> 92A -0.12073  
 79B -> 89B -0.19517  
 79B -> 90B -0.61443  
 79B -> 92B -0.10849  
 79B -> 95B -0.14096

|            |          |
|------------|----------|
| 79B -> 97B | 0.10111  |
| 79B ->106B | 0.10590  |
| 85B -> 90B | 0.12073  |
| 80A <- 90A | 0.16805  |
| 79B <- 90B | -0.16290 |

Excited State 5: 2.916-A' 3.0841 eV 402.01 nm f=0.0276  
<S\*\*2>=1.875

|            |          |
|------------|----------|
| 80A -> 90A | 0.16199  |
| 83A ->104A | 0.10091  |
| 84A -> 90A | -0.20852 |
| 84A -> 92A | -0.13144 |
| 84A -> 94A | 0.12062  |
| 86A -> 90A | -0.11482 |
| 88A -> 90A | -0.17576 |
| 88A -> 91A | -0.11794 |
| 88A -> 92A | 0.13988  |
| 89A -> 90A | 0.36293  |
| 89A -> 92A | 0.47643  |
| 79B -> 90B | -0.14512 |
| 82B -> 90B | -0.15630 |
| 83B -> 89B | 0.11210  |
| 83B -> 90B | -0.13029 |
| 85B -> 89B | -0.22348 |
| 85B -> 92B | -0.13280 |
| 85B -> 95B | 0.11416  |
| 87B -> 90B | -0.14023 |
| 88B -> 90B | 0.31023  |
| 88B -> 92B | -0.16977 |

Excited State 6: 3.331-A' 3.2101 eV 386.23 nm f=0.0009  
<S\*\*2>=2.523

|            |          |
|------------|----------|
| 86A -> 91A | 0.23341  |
| 86A -> 97A | 0.24203  |
| 87A -> 91A | 0.23549  |
| 87A -> 97A | -0.10764 |
| 87A -> 98A | -0.21226 |
| 88A -> 90A | 0.13956  |
| 88A -> 91A | -0.32806 |
| 89A -> 91A | -0.10501 |
| 89A -> 92A | 0.18230  |
| 86B -> 95B | 0.14493  |
| 86B -> 97B | 0.22812  |
| 87B -> 89B | 0.13311  |
| 87B -> 91B | 0.33908  |
| 87B ->100B | -0.18951 |
| 88B -> 89B | -0.19529 |
| 88B -> 90B | -0.23069 |
| 88B -> 91B | 0.35904  |

Excited State 7: 2.094-A" 3.2309 eV 383.75 nm f=0.0014  
<S\*\*2>=0.846

|            |          |
|------------|----------|
| 84B -> 89B | 0.93980  |
| 84B -> 90B | -0.19636 |
| 84B ->106B | 0.12397  |

**1e (X=CF<sub>3</sub>)**

Excited State 1: 2.301-A 2.3023 eV 538.52 nm f=0.0435  
<S\*\*2>=1.073

|            |          |
|------------|----------|
| 93A -> 95A | 0.13852  |
| 93A -> 96A | -0.11920 |
| 94A -> 95A | -0.40869 |
| 93B -> 94B | 0.82269  |
| 93B -> 95B | -0.10625 |

This state for optimization and/or second-order correction.  
Total Energy, E(TD-HF/TD-KS) = -1307.17331534

Excited State 2: 2.103-A 2.4301 eV 510.20 nm f=0.0237  
<S\*\*2>=0.856

|            |          |
|------------|----------|
| 94A -> 95A | 0.79822  |
| 94A -> 96A | 0.14928  |
| 94A -> 97A | 0.12899  |
| 94A ->103A | 0.17137  |
| 92B -> 94B | -0.16478 |
| 93B -> 94B | 0.42938  |

Excited State 3: 2.658-A 2.9361 eV 422.28 nm f=0.0213  
<S\*\*2>=1.516

|            |          |
|------------|----------|
| 88A ->106A | 0.14181  |
| 90A -> 97A | -0.17479 |
| 92A -> 96A | -0.10021 |
| 93A -> 96A | 0.25381  |
| 94A -> 95A | -0.18829 |
| 94A -> 96A | 0.76147  |
| 94A -> 97A | 0.14439  |
| 88B -> 94B | -0.15832 |
| 90B -> 94B | 0.10790  |
| 90B -> 97B | -0.13090 |
| 92B -> 95B | 0.10631  |
| 93B -> 96B | -0.23991 |

Excited State 4: 3.375-A 3.2272 eV 384.19 nm f=0.0055  
<S\*\*2>=2.597

|            |          |
|------------|----------|
| 91A -> 95A | 0.11686  |
| 91A ->101A | 0.28281  |
| 92A -> 95A | -0.32971 |
| 92A -> 96A | 0.10141  |
| 92A ->103A | 0.22441  |
| 93A -> 95A | -0.35712 |
| 94A ->103A | 0.10337  |
| 87B ->104B | 0.10534  |
| 91B ->101B | 0.28914  |
| 92B -> 94B | -0.17385 |
| 92B -> 95B | 0.35441  |
| 92B ->104B | -0.21302 |
| 93B -> 94B | 0.15540  |
| 93B -> 95B | 0.39962  |

Excited State 5: 2.095-A 3.2722 eV 378.91 nm f=0.0014  
<S\*\*2>=0.847

|            |          |
|------------|----------|
| 89B -> 94B | 0.96052  |
| 89B ->108B | -0.14555 |

**1f (X=OMe)**

Excited State 1: 2.233-A' 2.1987 eV 563.89 nm f=0.0731  
<S\*\*2>=0.996

|            |         |
|------------|---------|
| 86A -> 87A | 0.15113 |
| 83B -> 86B | 0.14628 |
| 85B -> 86B | 0.92169 |

This state for optimization and/or second-order correction.

Total Energy, E(TD-HF/TD-KS) = -1084.66955492

Copying the excited state density for this state as the 1-particle RhoCI density.

Excited State 2: 2.123-A' 2.3856 eV 519.71 nm f=0.0121  
<S\*\*2>=0.877

|            |          |
|------------|----------|
| 85A -> 87A | -0.19955 |
| 86A -> 87A | 0.86368  |
| 86A -> 88A | 0.22041  |
| 86A -> 96A | 0.17776  |
| 84B -> 86B | 0.10139  |
| 85B -> 86B | -0.17760 |

Excited State 3: 2.744-A' 2.9664 eV 417.96 nm f=0.0193  
<S\*\*2>=1.632

|            |          |
|------------|----------|
| 81A -> 92A | -0.12116 |
| 84A -> 87A | -0.12281 |
| 85A -> 88A | 0.22582  |
| 86A -> 87A | -0.25101 |
| 86A -> 88A | 0.69721  |
| 81B -> 86B | -0.21668 |
| 83B -> 86B | 0.14070  |
| 84B -> 86B | 0.13204  |
| 84B -> 87B | 0.11672  |
| 85B -> 87B | 0.10875  |
| 85B -> 88B | -0.28711 |

Excited State 4: 3.278-A' 3.2087 eV 386.40 nm f=0.0151  
<S\*\*2>=2.437

|            |          |
|------------|----------|
| 82A -> 87A | -0.17355 |
| 82A -> 96A | 0.10387  |
| 83A -> 92A | -0.12558 |
| 83A -> 93A | -0.20988 |
| 83A -> 96A | -0.10125 |
| 84A -> 87A | -0.31931 |
| 84A -> 93A | -0.11514 |
| 84A -> 96A | 0.11316  |
| 85A -> 87A | -0.28636 |
| 86A -> 88A | -0.24246 |
| 79B -> 97B | -0.10234 |
| 82B -> 92B | 0.24233  |
| 83B -> 87B | -0.16339 |
| 83B -> 97B | 0.12723  |
| 84B -> 86B | 0.25883  |
| 84B -> 87B | 0.32761  |
| 84B -> 94B | -0.14035 |
| 84B -> 97B | -0.12101 |
| 85B -> 86B | -0.16658 |
| 85B -> 87B | 0.37811  |

Excited State 5: 2.099-A" 3.3565 eV 369.38 nm f=0.0013  
<S\*\*2>=0.852  
80B -> 86B 0.96178

**1g (X=F)**

Excited State 1: 2.271-A' 2.2541 eV 550.04 nm f=0.0573  
<S\*\*2>=1.039  
81A -> 83A -0.12718  
82A -> 83A 0.24177  
78B -> 82B -0.13132  
81B -> 82B 0.89845

This state for optimization and/or second-order correction.  
Total Energy, E(TD-HF/TD-KS) = -1069.40437026

Excited State 2: 2.101-A' 2.4269 eV 510.87 nm f=0.0159  
<S\*\*2>=0.853  
81A -> 83A -0.13445  
82A -> 83A 0.85201  
82A -> 84A 0.22407  
82A -> 92A 0.17906  
80B -> 82B 0.14151  
81B -> 82B -0.26713

Excited State 3: 2.709-A' 3.0029 eV 412.88 nm f=0.0235  
<S\*\*2>=1.584  
77A -> 96A -0.14470  
78A -> 86A 0.11538  
80A -> 83A -0.11164  
81A -> 84A 0.21847  
81A -> 86A 0.10678  
82A -> 83A -0.24247  
82A -> 84A 0.72582  
77B -> 82B -0.25321  
78B -> 87B -0.11814  
80B -> 83B 0.12328  
81B -> 84B -0.25088

Excited State 4: 3.354-A' 3.2237 eV 384.60 nm f=0.0096  
<S\*\*2>=2.562  
79A -> 89A 0.27791  
80A -> 83A -0.36300  
80A -> 86A 0.11382  
80A -> 92A 0.18945  
81A -> 83A -0.32707  
82A -> 84A -0.15254  
75B -> 92B -0.11183  
79B -> 87B 0.11706  
79B -> 89B 0.25582  
80B -> 82B 0.20458  
80B -> 83B 0.36484  
80B -> 92B -0.20015  
81B -> 82B -0.15030  
81B -> 83B 0.38536

Excited State 5: 2.096-A" 3.2954 eV 376.24 nm f=0.0014  
<S\*\*2>=0.849  
76B -> 82B 0.96054

76B -> 98B 0.12121

**1h (X=C1)**

Excited State 1: 2.282-A' 2.2720 eV 545.70 nm f=0.0557  
<S\*\*2>=1.052

85A -> 87A -0.13342  
86A -> 87A 0.28585  
82B -> 86B 0.14536  
85B -> 86B 0.87820  
85B -> 87B 0.10190

This state for optimization and/or second-order correction.  
Total Energy, E(TD-HF/TD-KS) = -1429.77511300

Excited State 2: 2.103-A' 2.4228 eV 511.75 nm f=0.0179  
<S\*\*2>=0.855

85A -> 87A -0.11649  
86A -> 87A 0.84046  
86A -> 88A 0.20666  
86A -> 95A 0.17892  
84B -> 86B 0.13696  
85B -> 86B -0.31086

Excited State 3: 2.723-A' 2.9585 eV 419.08 nm f=0.0224  
<S\*\*2>=1.604

81A -> 89A -0.10724  
81A -> 99A -0.14033  
82A -> 89A -0.13526  
84A -> 87A -0.10539  
85A -> 88A 0.25001  
86A -> 87A -0.22629  
86A -> 88A 0.73150  
81B -> 86B -0.23394  
82B -> 90B 0.14925  
84B -> 87B 0.11259  
85B -> 88B -0.26899

Excited State 4: 3.370-A' 3.2222 eV 384.78 nm f=0.0072  
<S\*\*2>=2.590

83A -> 93A 0.27770  
84A -> 87A -0.36183  
84A -> 89A 0.10916  
84A -> 95A 0.19206  
85A -> 87A -0.33488  
79B -> 96B -0.11513  
83B -> 93B 0.27547  
84B -> 86B 0.19312  
84B -> 87B 0.36509  
84B -> 96B -0.20192  
85B -> 86B -0.15973  
85B -> 87B 0.39057

Excited State 5: 2.096-A'' 3.2870 eV 377.19 nm f=0.0014  
<S\*\*2>=0.848

80B -> 86B 0.96045  
80B -> 90B 0.10219  
80B -> 101B -0.13633



**1i (X=Br)**

Excited State 1: 2.288-A' 2.2706 eV 546.05 nm f=0.0557  
<S\*\*2>=1.059

|            |          |
|------------|----------|
| 80A -> 82A | -0.13577 |
| 81A -> 82A | 0.29952  |
| 77B -> 81B | 0.15272  |
| 80B -> 81B | 0.86979  |
| 80B -> 82B | 0.10268  |

This state for optimization and/or second-order correction.  
Total Energy, E(TD-HF/TD-KS) = -982.703252787

Excited State 2: 2.103-A' 2.4183 eV 512.69 nm f=0.0190  
<S\*\*2>=0.855

|            |          |
|------------|----------|
| 80A -> 82A | -0.11317 |
| 81A -> 82A | 0.83557  |
| 81A -> 83A | 0.20209  |
| 81A -> 90A | 0.17929  |
| 79B -> 81B | 0.12978  |
| 80B -> 81B | -0.32568 |

Excited State 3: 2.720-A' 2.9486 eV 420.49 nm f=0.0223  
<S\*\*2>=1.599

|            |          |
|------------|----------|
| 76A -> 84A | -0.12382 |
| 76A -> 94A | -0.12917 |
| 77A -> 84A | -0.11469 |
| 79A -> 82A | -0.10664 |
| 80A -> 83A | 0.25192  |
| 81A -> 82A | -0.22518 |
| 81A -> 83A | 0.73228  |
| 76B -> 81B | -0.22903 |
| 77B -> 85B | 0.13298  |
| 79B -> 82B | 0.11231  |
| 80B -> 83B | -0.26886 |

Excited State 4: 3.371-A' 3.2134 eV 385.84 nm f=0.0071  
<S\*\*2>=2.591

|            |          |
|------------|----------|
| 77A -> 82A | 0.11371  |
| 78A -> 89A | 0.27666  |
| 79A -> 82A | -0.35784 |
| 79A -> 84A | 0.10649  |
| 79A -> 90A | 0.18546  |
| 80A -> 82A | -0.33116 |
| 74B -> 92B | -0.11304 |
| 78B -> 89B | -0.27133 |
| 79B -> 81B | 0.18846  |
| 79B -> 82B | 0.36262  |
| 79B -> 92B | -0.19944 |
| 80B -> 81B | -0.16193 |
| 80B -> 82B | 0.38725  |

Excited State 5: 2.096-A" 3.2854 eV 377.38 nm f=0.0014  
<S\*\*2>=0.849

|            |         |
|------------|---------|
| 75B -> 81B | 0.96012 |
| 75B -> 85B | 0.10215 |
| 75B -> 96B | 0.12697 |

1j (X=COMe)

Excited State 1: 2.298-A' 2.3008 eV 538.88 nm f=0.0315  
<S\*\*2>=1.070

|            |          |
|------------|----------|
| 88A -> 91A | 0.18479  |
| 89A -> 90A | -0.39955 |
| 89A -> 91A | -0.40924 |
| 89A -> 92A | 0.12172  |
| 88B -> 89B | 0.70455  |
| 88B -> 91B | 0.10909  |

This state for optimization and/or second-order correction.

Total Energy, E(TD-HF/TD-KS) = -1122.77515629

Copying the excited state density for this state as the 1-particle RhoCI density.

Excited State 2: 2.187-A' 2.3764 eV 521.74 nm f=0.0401  
<S\*\*2>=0.946

|            |          |
|------------|----------|
| 89A -> 90A | 0.60090  |
| 89A -> 91A | 0.33596  |
| 89A -> 92A | -0.17342 |
| 89A -> 98A | -0.13992 |
| 85B -> 89B | 0.10491  |
| 87B -> 89B | -0.13616 |
| 88B -> 89B | 0.58852  |
| 88B -> 90B | -0.10866 |

Excited State 3: 2.655-A' 2.7220 eV 455.48 nm f=0.0131  
<S\*\*2>=1.512

|            |          |
|------------|----------|
| 83A -> 90A | 0.17037  |
| 84A -> 92A | -0.11607 |
| 87A -> 90A | 0.13912  |
| 88A -> 90A | -0.26386 |
| 89A -> 90A | -0.36003 |
| 89A -> 91A | 0.68374  |
| 89A -> 92A | 0.13737  |
| 83B -> 89B | 0.11301  |
| 83B -> 90B | -0.13735 |
| 87B -> 90B | -0.12731 |
| 88B -> 89B | 0.13725  |
| 88B -> 90B | 0.21202  |
| 88B -> 91B | 0.10588  |

Excited State 4: 3.336-A' 3.2177 eV 385.32 nm f=0.0037  
<S\*\*2>=2.532

|            |          |
|------------|----------|
| 86A -> 96A | 0.26157  |
| 86A ->100A | -0.11219 |
| 87A -> 90A | 0.15421  |
| 87A -> 91A | 0.32792  |
| 87A -> 98A | 0.17457  |
| 87A ->100A | -0.11939 |
| 88A -> 90A | 0.17999  |
| 88A -> 91A | 0.30647  |
| 89A -> 90A | 0.11376  |
| 89A -> 92A | 0.18235  |
| 81B ->100B | -0.11182 |
| 86B -> 96B | 0.27532  |
| 87B -> 89B | 0.14314  |
| 87B -> 90B | -0.18750 |

|            |          |
|------------|----------|
| 87B -> 91B | 0.31862  |
| 87B ->100B | -0.19646 |
| 88B -> 89B | -0.17186 |
| 88B -> 90B | -0.22333 |
| 88B -> 91B | 0.32697  |

Excited State 5: 2.096-A" 3.3023 eV 375.45 nm f=0.0014  
 <S\*\*2>=0.848

|            |         |
|------------|---------|
| 82B -> 89B | 0.83475 |
| 82B ->101B | 0.12579 |
| 84B -> 89B | 0.47678 |

### 11 (X=NH<sub>2</sub>)

Excited State 1: 2.213-A 2.1509 eV 576.42 nm f=0.0801  
 <S\*\*2>=0.975

|            |          |
|------------|----------|
| 82A -> 83A | 0.10062  |
| 79B -> 82B | -0.13882 |
| 80B -> 82B | 0.20319  |
| 81B -> 82B | 0.91942  |

This state for optimization and/or second-order correction.  
 Total Energy, E(TD-HF/TD-KS) = -1025.52647378

Excited State 2: 2.134-A 2.3760 eV 521.82 nm f=0.0100  
 <S\*\*2>=0.889

|            |          |
|------------|----------|
| 81A -> 83A | 0.23450  |
| 82A -> 83A | 0.86504  |
| 82A -> 84A | 0.20271  |
| 82A -> 92A | 0.17514  |
| 81B -> 82B | -0.13286 |

Excited State 3: 2.820-A 2.9700 eV 417.45 nm f=0.0143  
 <S\*\*2>=1.739

|            |          |
|------------|----------|
| 80A -> 83A | 0.14680  |
| 81A -> 84A | -0.21727 |
| 82A -> 83A | -0.25057 |
| 82A -> 84A | 0.60654  |
| 77B -> 82B | -0.19326 |
| 79B -> 82B | -0.13513 |
| 79B -> 83B | -0.12044 |
| 80B -> 82B | 0.30337  |
| 80B -> 83B | -0.12589 |
| 81B -> 83B | -0.14537 |
| 81B -> 84B | -0.30272 |

Excited State 4: 2.926-A 3.1171 eV 397.76 nm f=0.0117  
 <S\*\*2>=1.891

|            |          |
|------------|----------|
| 77A -> 88A | 0.11223  |
| 78A -> 83A | 0.11405  |
| 79A -> 89A | -0.10086 |
| 80A -> 83A | 0.13381  |
| 80A -> 88A | -0.13414 |
| 81A -> 83A | 0.19869  |
| 81A -> 88A | 0.16731  |
| 82A -> 84A | -0.33302 |
| 77B -> 82B | 0.21095  |
| 77B -> 84B | 0.11078  |
| 78B -> 88B | -0.12143 |

|            |          |
|------------|----------|
| 79B -> 83B | -0.14091 |
| 80B -> 82B | 0.50431  |
| 80B -> 83B | -0.11369 |
| 80B -> 90B | 0.10297  |
| 80B -> 91B | -0.12464 |
| 81B -> 82B | -0.21745 |
| 81B -> 83B | -0.31020 |
| 81B -> 88B | -0.10851 |
| 81B -> 90B | -0.12694 |
| 81B -> 91B | 0.15565  |

Excited State 5: 3.164-A 3.3010 eV 375.59 nm f=0.0021  
 <S\*\*2>=2.253

|            |          |
|------------|----------|
| 78A -> 83A | -0.22497 |
| 78A -> 89A | 0.14491  |
| 78A -> 92A | 0.10051  |
| 79A -> 83A | 0.10520  |
| 79A -> 88A | -0.13923 |
| 79A -> 89A | 0.18421  |
| 79A -> 92A | -0.12214 |
| 80A -> 83A | -0.31364 |
| 81A -> 83A | -0.12523 |
| 81A -> 84A | -0.12301 |
| 82A -> 92A | -0.11567 |
| 78B -> 82B | -0.10502 |
| 78B -> 88B | 0.23857  |
| 79B -> 82B | -0.25933 |
| 79B -> 83B | 0.21293  |
| 79B -> 93B | -0.14850 |
| 80B -> 82B | 0.38920  |
| 80B -> 83B | 0.34504  |
| 80B -> 93B | -0.10721 |
| 81B -> 83B | 0.12862  |
| 81B -> 84B | -0.14558 |
| 81B -> 91B | 0.11652  |

**1m (X=NHAc)**

Excited State 1: 2.252-A 2.2253 eV 557.15 nm f=0.0733  
 <S\*\*2>=1.017

|            |          |
|------------|----------|
| 92A -> 94A | -0.10989 |
| 93A -> 94A | 0.19164  |
| 90B -> 93B | 0.16242  |
| 91B -> 93B | 0.15820  |
| 92B -> 93B | 0.89732  |

This state for optimization and/or second-order correction.

Total Energy, E(TD-HF/TD-KS) = -1178.13449543

Copying the excited state density for this state as the 1-particle RhoCI density.

Excited State 2: 2.112-A 2.3964 eV 517.38 nm f=0.0161  
 <S\*\*2>=0.865

|             |          |
|-------------|----------|
| 92A -> 94A  | -0.17633 |
| 93A -> 94A  | 0.86290  |
| 93A -> 95A  | 0.17420  |
| 93A -> 103A | 0.18201  |
| 90B -> 93B  | -0.10742 |
| 92B -> 93B  | -0.22533 |

Excited State 3: 2.824-A 2.9806 eV 415.97 nm f=0.0129  
 <S\*\*2>=1.744

|            |          |
|------------|----------|
| 88A -> 97A | -0.11882 |
| 91A -> 94A | -0.11705 |
| 91A -> 97A | -0.11320 |
| 92A -> 95A | 0.26322  |
| 92A -> 97A | 0.10491  |
| 93A -> 94A | -0.20369 |
| 93A -> 95A | 0.67537  |
| 93A -> 97A | -0.10869 |
| 88B -> 93B | -0.24912 |
| 90B -> 98B | 0.11291  |
| 91B -> 94B | 0.11661  |
| 91B -> 98B | 0.10722  |
| 92B -> 95B | -0.32016 |

Excited State 4: 3.284-A 3.1888 eV 388.81 nm f=0.0086  
 <S\*\*2>=2.447

|            |          |
|------------|----------|
| 89A -> 94A | -0.19678 |
| 89A ->103A | 0.11911  |
| 90A ->100A | -0.22523 |
| 90A ->103A | -0.10577 |
| 91A -> 94A | -0.28856 |
| 91A -> 97A | 0.13943  |
| 91A ->103A | 0.10360  |
| 92A -> 94A | -0.29276 |
| 85B ->104B | -0.10458 |
| 89B ->100B | 0.23907  |
| 90B -> 94B | -0.21676 |
| 90B ->104B | 0.13554  |
| 91B -> 93B | 0.32264  |
| 91B -> 94B | 0.27933  |
| 91B -> 98B | -0.13690 |
| 91B ->104B | -0.10340 |
| 92B -> 93B | -0.21072 |
| 92B -> 94B | 0.38406  |

Excited State 5: 2.097-A 3.3289 eV 372.45 nm f=0.0013  
 <S\*\*2>=0.849

|            |          |
|------------|----------|
| 86B -> 93B | 0.11734  |
| 87B -> 93B | 0.95463  |
| 87B ->109B | -0.12108 |

**1n (X=I)**

Excited State 1: 2.290-A' 2.2738 eV 545.26 nm f=0.0564  
 <S\*\*2>=1.061

|            |          |
|------------|----------|
| 80A -> 82A | -0.13678 |
| 81A -> 82A | 0.31527  |
| 78B -> 81B | 0.14933  |
| 80B -> 81B | 0.85694  |

This state for optimization and/or second-order correction.  
 Total Energy, E(TD-HF/TD-KS) = -980.916260976

Excited State 2: 2.102-A' 2.4131 eV 513.79 nm f=0.0208  
 <S\*\*2>=0.854

|            |          |
|------------|----------|
| 80A -> 82A | -0.11392 |
|------------|----------|

|            |          |
|------------|----------|
| 81A -> 82A | 0.83045  |
| 81A -> 83A | 0.19493  |
| 81A -> 91A | 0.17971  |
| 78B -> 81B | -0.11335 |
| 80B -> 81B | -0.34212 |

Excited State 3: 2.720-A' 2.9451 eV 420.98 nm f=0.0218  
<S\*\*2>=1.599

|            |          |
|------------|----------|
| 75A -> 85A | -0.14612 |
| 75A -> 94A | -0.10972 |
| 79A -> 82A | -0.10287 |
| 80A -> 83A | 0.25211  |
| 81A -> 82A | -0.22006 |
| 81A -> 83A | 0.73307  |
| 76B -> 81B | -0.21588 |
| 76B -> 86B | 0.10456  |
| 78B -> 86B | 0.10152  |
| 79B -> 82B | 0.10717  |
| 80B -> 84B | -0.27142 |

Excited State 4: 3.370-A' 3.2133 eV 385.85 nm f=0.0070  
<S\*\*2>=2.589

|            |          |
|------------|----------|
| 77A -> 82A | 0.19380  |
| 77A -> 91A | -0.12166 |
| 78A -> 89A | -0.26543 |
| 78A -> 91A | -0.11735 |
| 79A -> 82A | -0.32771 |
| 79A -> 91A | 0.14690  |
| 80A -> 82A | -0.31903 |
| 73B -> 93B | -0.10328 |
| 77B -> 81B | 0.10459  |
| 77B -> 89B | 0.26306  |
| 78B -> 82B | -0.15427 |
| 78B -> 89B | 0.10499  |
| 78B -> 93B | 0.12713  |
| 79B -> 81B | 0.17784  |
| 79B -> 82B | 0.34327  |
| 79B -> 93B | -0.17507 |
| 80B -> 81B | -0.16701 |
| 80B -> 82B | 0.38084  |

Excited State 5: 2.096-A'' 3.2882 eV 377.05 nm f=0.0013  
<S\*\*2>=0.848

|            |          |
|------------|----------|
| 74B -> 81B | 0.92803  |
| 74B -> 96B | 0.10721  |
| 75B -> 81B | -0.24709 |

**1o (X=OH)**

Excited State 1: 2.237-A' 2.2007 eV 563.38 nm f=0.0709  
<S\*\*2>=1.001

|            |          |
|------------|----------|
| 81A -> 83A | -0.10099 |
| 82A -> 83A | 0.15665  |
| 79B -> 82B | -0.14047 |
| 81B -> 82B | 0.92152  |

This state for optimization and/or second-order correction.  
Total Energy, E(TD-HF/TD-KS) = -1045.39331038

Copying the excited state density for this state as the 1-particle RhoCI density.

Excited State 2: 2.118-A' 2.3987 eV 516.87 nm f=0.0128  
<S\*\*2>=0.872  
81A -> 83A -0.18922  
82A -> 83A 0.86529  
82A -> 84A 0.21569  
82A -> 92A 0.18008  
80B -> 82B 0.10857  
81B -> 82B -0.18504

Excited State 3: 2.762-A' 2.9960 eV 413.83 nm f=0.0183  
<S\*\*2>=1.658  
77A -> 88A -0.12553  
77A -> 96A 0.11501  
80A -> 83A -0.13151  
81A -> 84A 0.21802  
82A -> 83A -0.24594  
82A -> 84A 0.69014  
77B -> 82B -0.24783  
79B -> 82B -0.10374  
80B -> 83B 0.13140  
81B -> 83B 0.10610  
81B -> 84B -0.27920

Excited State 4: 3.274-A' 3.2033 eV 387.06 nm f=0.0132  
<S\*\*2>=2.429  
78A -> 83A -0.16151  
79A -> 89A -0.23062  
80A -> 83A -0.31052  
80A -> 88A 0.12542  
80A -> 92A 0.12625  
81A -> 83A -0.29298  
82A -> 84A -0.21674  
75B -> 93B -0.10740  
78B -> 88B 0.21988  
78B -> 90B -0.10895  
79B -> 83B 0.15312  
79B -> 93B -0.12271  
80B -> 82B 0.28552  
80B -> 83B 0.31379  
80B -> 90B -0.14521  
80B -> 93B -0.14026  
81B -> 82B -0.16906  
81B -> 83B 0.38162

Excited State 5: 2.098-A" 3.3374 eV 371.50 nm f=0.0014  
<S\*\*2>=0.851  
76B -> 82B 0.96141  
76B -> 99B 0.11848

**1p (X=OBn)**

Excited State 1: 2.234-A 2.2008 eV 563.36 nm f=0.0748  
<S\*\*2>=0.998  
106A ->107A 0.15335  
102B ->106B -0.13053  
105B ->106B 0.92137

This state for optimization and/or second-order correction.  
 Total Energy, E(TD-HF/TD-KS) = -1315.60545868  
 Copying the excited state density for this state as the 1-particle RhoCI density.

Excited State 2: 2.123-A 2.3879 eV 519.21 nm f=0.0124  
 <S\*\*2>=0.877  
 105A ->107A -0.19704  
 106A ->107A 0.86301  
 106A ->108A 0.22190  
 106A ->119A -0.17227  
 104B ->106B -0.10326  
 105B ->106B -0.17963

Excited State 3: 2.738-A 2.9641 eV 418.29 nm f=0.0208  
 <S\*\*2>=1.625  
 104A ->107A 0.11734  
 105A ->108A 0.22337  
 106A ->107A -0.25256  
 106A ->108A 0.69326  
 99B ->106B -0.21797  
 102B ->106B -0.11332  
 104B ->106B -0.12379  
 104B ->107B 0.11494  
 105B ->107B -0.10570  
 105B ->108B 0.27732

Excited State 4: 3.287-A 3.2097 eV 386.29 nm f=0.0145  
 <S\*\*2>=2.452  
 100A ->107A -0.16678  
 102A ->116A 0.21188  
 104A ->107A -0.31436  
 104A ->116A 0.10209  
 104A ->119A -0.10762  
 105A ->107A 0.28973  
 106A ->108A 0.23104  
 100B ->114B 0.22384  
 102B ->107B 0.14099  
 104B ->106B 0.25067  
 104B ->107B -0.33178  
 104B ->117B 0.13695  
 104B ->120B 0.10192  
 105B ->106B 0.16531  
 105B ->107B 0.37967

Excited State 5: 2.099-A 3.3527 eV 369.81 nm f=0.0013  
 <S\*\*2>=0.852  
 98B ->106B 0.96095

**1q (X=Ph)**

Excited State 1: 2.281-A 2.2718 eV 545.75 nm f=0.0628  
 <S\*\*2>=1.051  
 97A -> 99A -0.13240  
 98A -> 99A -0.31749  
 95B -> 98B 0.14317  
 96B -> 98B 0.19851  
 97B -> 98B 0.84106



This state for optimization and/or second-order correction.  
Total Energy, E(TD-HF/TD-KS) = -1201.11749428

Excited State 2: 2.107-A 2.3857 eV 519.70 nm f=0.0251  
<S\*\*2>=0.860

|            |          |
|------------|----------|
| 97A -> 99A | 0.12312  |
| 98A -> 99A | 0.83282  |
| 98A ->101A | -0.16566 |
| 98A ->109A | 0.13922  |
| 98A ->110A | -0.11448 |
| 95B -> 98B | 0.14520  |
| 97B -> 98B | 0.34713  |

Excited State 3: 2.937-A 2.8745 eV 431.33 nm f=0.0115  
<S\*\*2>=1.907

|            |          |
|------------|----------|
| 92A ->101A | 0.12241  |
| 92A ->109A | 0.10292  |
| 94A ->105A | 0.10125  |
| 96A -> 99A | 0.10039  |
| 96A ->100A | 0.12166  |
| 96A ->101A | 0.11821  |
| 97A ->100A | -0.31539 |
| 98A -> 99A | -0.13730 |
| 98A ->100A | 0.59690  |
| 98A ->101A | -0.24628 |
| 92B -> 98B | 0.18182  |
| 96B -> 99B | 0.10928  |
| 96B ->100B | -0.17344 |
| 96B ->102B | 0.10461  |
| 97B ->100B | 0.32762  |

Excited State 4: 3.339-A 3.2037 eV 387.00 nm f=0.0041  
<S\*\*2>=2.538

|            |          |
|------------|----------|
| 93A -> 99A | 0.23379  |
| 93A ->106A | 0.12967  |
| 93A ->109A | -0.13434 |
| 95A -> 99A | -0.12569 |
| 95A ->106A | 0.21023  |
| 95A ->110A | -0.13015 |
| 96A -> 99A | 0.25471  |
| 96A ->100A | -0.16395 |
| 97A -> 99A | 0.29445  |
| 98A -> 99A | -0.10505 |
| 98A ->101A | -0.13439 |
| 94B ->106B | 0.25511  |
| 95B -> 99B | -0.26502 |
| 95B ->110B | 0.13630  |
| 96B -> 98B | -0.18262 |
| 96B -> 99B | 0.25228  |
| 96B ->100B | 0.15482  |
| 97B -> 98B | 0.19841  |
| 97B -> 99B | 0.36800  |

Excited State 5: 2.097-A 3.3262 eV 372.76 nm f=0.0013  
<S\*\*2>=0.849

|            |         |
|------------|---------|
| 91B -> 98B | 0.96060 |
| 91B ->112B | 0.12197 |

**1r (X=thienyl)**

Excited State 1: 2.275-A 2.2596 eV 548.70 nm f=0.0703  
<S\*\*2>=1.044

|            |         |
|------------|---------|
| 98A ->100A | 0.11801 |
| 99A ->100A | 0.22705 |
| 99A ->101A | 0.11606 |
| 96B -> 99B | 0.13502 |
| 97B -> 99B | 0.34771 |
| 98B -> 99B | 0.81995 |

This state for optimization and/or second-order correction.  
Total Energy, E(TD-HF/TD-KS) = -1521.91246062

Excited State 2: 2.202-A 2.3762 eV 521.78 nm f=0.0167  
<S\*\*2>=0.962

|            |          |
|------------|----------|
| 98A ->101A | 0.17855  |
| 99A ->100A | 0.83602  |
| 99A ->102A | 0.19154  |
| 99A ->110A | 0.14386  |
| 96B -> 99B | -0.13638 |
| 98B -> 99B | -0.25188 |
| 98B ->101B | 0.14219  |

Excited State 3: 3.210-A 2.6200 eV 473.23 nm f=0.0094  
<S\*\*2>=2.327

|            |          |
|------------|----------|
| 97A ->100A | 0.11687  |
| 97A ->101A | -0.17641 |
| 97A ->102A | -0.11772 |
| 98A ->100A | 0.26124  |
| 98A ->101A | -0.37879 |
| 99A ->100A | 0.11827  |
| 99A ->101A | 0.44891  |
| 93B -> 99B | -0.11086 |
| 97B ->100B | -0.15346 |
| 97B ->101B | 0.25297  |
| 97B ->103B | -0.11444 |
| 98B -> 99B | -0.15629 |
| 98B ->100B | 0.20802  |
| 98B ->101B | -0.39897 |

Excited State 4: 2.857-A 3.1056 eV 399.23 nm f=0.0069  
<S\*\*2>=1.791

|            |          |
|------------|----------|
| 94A ->100A | -0.13130 |
| 96A ->100A | 0.10787  |
| 97A ->101A | 0.26144  |
| 98A ->100A | -0.15074 |
| 98A ->102A | 0.11069  |
| 99A ->101A | 0.47067  |
| 99A ->102A | -0.41212 |
| 99A ->108A | -0.10412 |
| 91B -> 99B | 0.10317  |
| 96B ->100B | 0.19594  |
| 97B -> 99B | -0.19958 |
| 97B ->101B | -0.22788 |
| 98B -> 99B | 0.17996  |
| 98B ->100B | -0.20603 |
| 98B ->103B | -0.14365 |

**1s (X=CCPh)**

Excited State 1: 2.284-A' 2.2709 eV 545.96 nm f=0.0757  
<S\*\*2>=1.054

|             |          |
|-------------|----------|
| 102A ->106A | -0.10550 |
| 104A ->105A | -0.12769 |
| 104A ->106A | 0.23774  |
| 101B ->104B | -0.13132 |
| 102B ->104B | 0.39146  |
| 103B ->104B | 0.79017  |

This state for optimization and/or second-order correction.

Total Energy, E(TD-HF/TD-KS) = -1277.23262934

Excited State 2: 2.375-A' 2.3608 eV 525.18 nm f=0.0150  
<S\*\*2>=1.160

|             |          |
|-------------|----------|
| 103A ->105A | 0.10252  |
| 103A ->106A | 0.22946  |
| 104A ->105A | 0.69115  |
| 104A ->106A | -0.40274 |
| 104A ->107A | -0.22786 |
| 104A ->117A | -0.14683 |
| 101B ->104B | -0.12790 |
| 103B ->104B | 0.21449  |
| 103B ->105B | -0.16084 |
| 103B ->106B | -0.14852 |

Excited State 3: 3.079-A' 2.5476 eV 486.67 nm f=0.0144  
<S\*\*2>=2.120

|             |          |
|-------------|----------|
| 99A ->111A  | 0.10474  |
| 102A ->105A | -0.16216 |
| 103A ->105A | 0.42449  |
| 103A ->106A | 0.13706  |
| 104A ->106A | 0.52008  |
| 104A ->117A | 0.10053  |
| 99B ->111B  | -0.11556 |
| 102B ->105B | 0.23578  |
| 102B ->106B | 0.13148  |
| 102B ->108B | 0.10974  |
| 103B ->104B | -0.22538 |
| 103B ->105B | -0.36144 |
| 103B ->106B | -0.21686 |

Excited State 4: 2.816-A' 3.0670 eV 404.25 nm f=0.0040  
<S\*\*2>=1.732

|             |          |
|-------------|----------|
| 99A ->111A  | -0.14039 |
| 100A ->105A | 0.11396  |
| 102A ->105A | 0.14743  |
| 102A ->106A | 0.21486  |
| 103A ->105A | -0.15422 |
| 103A ->107A | -0.10381 |
| 104A ->105A | 0.23240  |
| 104A ->106A | 0.45348  |
| 104A ->107A | -0.43828 |
| 104A ->112A | -0.12143 |
| 96B ->104B  | -0.10455 |
| 99B ->111B  | 0.15761  |
| 101B ->105B | 0.15458  |
| 102B ->104B | -0.15259 |

|             |          |
|-------------|----------|
| 102B ->105B | -0.13458 |
| 102B ->106B | -0.19324 |
| 103B ->104B | 0.12961  |
| 103B ->105B | 0.17126  |
| 103B ->108B | 0.17082  |

**1t (X=OAc)**

Excited State 1: 2.280-A 2.2687 eV 546.51 nm f=0.0580  
 <S\*\*2>=1.050

|            |          |
|------------|----------|
| 92A -> 94A | 0.13369  |
| 93A -> 94A | -0.29134 |
| 89B -> 93B | -0.13590 |
| 92B -> 93B | 0.87906  |

This state for optimization and/or second-order correction.  
 Total Energy, E(TD-HF/TD-KS) = -1197.99274023

Excited State 2: 2.097-A 2.4110 eV 514.24 nm f=0.0201  
 <S\*\*2>=0.849

|            |          |
|------------|----------|
| 92A -> 94A | -0.12263 |
| 93A -> 94A | 0.84127  |
| 93A -> 95A | 0.19011  |
| 93A ->103A | 0.18380  |
| 91B -> 93B | -0.13090 |
| 92B -> 93B | 0.31898  |

Excited State 3: 2.721-A 2.9873 eV 415.04 nm f=0.0198  
 <S\*\*2>=1.601

|            |          |
|------------|----------|
| 89A -> 97A | 0.13031  |
| 91A -> 94A | -0.10981 |
| 92A -> 95A | 0.24532  |
| 93A -> 94A | -0.21819 |
| 93A -> 95A | 0.72110  |
| 88B -> 93B | 0.24254  |
| 91B -> 94B | 0.12067  |
| 92B -> 95B | -0.26609 |

Excited State 4: 3.364-A 3.2247 eV 384.49 nm f=0.0082  
 <S\*\*2>=2.579

|            |          |
|------------|----------|
| 90A ->100A | -0.27498 |
| 91A -> 94A | -0.36331 |
| 91A ->103A | 0.18975  |
| 92A -> 94A | -0.32948 |
| 93A -> 95A | -0.12167 |
| 86B ->105B | 0.11432  |
| 90B ->100B | 0.26827  |
| 91B -> 93B | -0.20131 |
| 91B -> 94B | 0.36566  |
| 91B ->105B | 0.19900  |
| 92B -> 93B | 0.15621  |
| 92B -> 94B | 0.38810  |

Excited State 5: 2.096-A 3.3125 eV 374.29 nm f=0.0014  
 <S\*\*2>=0.849

|            |         |
|------------|---------|
| 87B -> 93B | 0.96087 |
|------------|---------|

**1u (X=NHCOCF<sub>3</sub>)**

Excited State 1: 2.269-A 2.2504 eV 550.95 nm f=0.0666  
<S\*\*2>=1.037

|             |          |
|-------------|----------|
| 104A ->106A | -0.11862 |
| 105A ->106A | 0.22317  |
| 101B ->105B | -0.12958 |
| 102B ->105B | -0.12030 |
| 104B ->105B | 0.89135  |

This state for optimization and/or second-order correction.

Total Energy, E(TD-HF/TD-KS) = -1475.82048199

Copying the excited state density for this state as the 1-particle RhoCI density.

Excited State 2: 2.116-A 2.4148 eV 513.43 nm f=0.0173  
<S\*\*2>=0.870

|             |          |
|-------------|----------|
| 104A ->106A | -0.12855 |
| 105A ->106A | 0.85748  |
| 105A ->108A | 0.19376  |
| 105A ->113A | 0.10791  |
| 105A ->115A | 0.16070  |
| 103B ->105B | 0.10917  |
| 104B ->105B | -0.25740 |

Excited State 3: 2.852-A 2.9143 eV 425.44 nm f=0.0134  
<S\*\*2>=1.784

|             |          |
|-------------|----------|
| 100A ->108A | -0.11112 |
| 100A ->113A | 0.10242  |
| 101A ->108A | 0.13182  |
| 103A ->106A | 0.12352  |
| 103A ->107A | -0.11587 |
| 104A ->107A | 0.28253  |
| 105A ->106A | 0.13274  |
| 105A ->107A | 0.60692  |
| 105A ->108A | -0.31773 |
| 105A ->123A | -0.10287 |
| 100B ->105B | 0.22110  |
| 102B ->108B | -0.10164 |
| 103B ->106B | -0.12822 |
| 103B ->107B | 0.12603  |
| 104B ->107B | -0.29523 |

Excited State 4: 3.357-A 3.2045 eV 386.90 nm f=0.0055  
<S\*\*2>=2.567

|             |          |
|-------------|----------|
| 101A ->106A | -0.15212 |
| 102A ->112A | -0.23283 |
| 102A ->113A | 0.10332  |
| 102A ->115A | -0.11830 |
| 103A ->106A | -0.31999 |
| 103A ->107A | -0.14967 |
| 103A ->113A | 0.12078  |
| 103A ->115A | 0.13752  |
| 104A ->106A | -0.32693 |
| 98B ->117B  | -0.10847 |
| 101B ->112B | 0.20690  |
| 102B ->106B | 0.12466  |
| 102B ->112B | -0.16748 |
| 102B ->117B | -0.11396 |
| 103B ->105B | 0.21536  |
| 103B ->106B | 0.32553  |

|             |          |
|-------------|----------|
| 103B ->107B | 0.13722  |
| 103B ->115B | -0.12648 |
| 103B ->117B | -0.14014 |
| 104B ->105B | -0.18543 |
| 104B ->106B | 0.39348  |

Excited State 5: 2.097-A 3.2942 eV 376.37 nm f=0.0014  
<S\*\*2>=0.849  
99B ->105B 0.96068

**1v (NHCOOMe)**

Excited State 1: 2.249-A 2.2206 eV 558.34 nm f=0.0739  
<S\*\*2>=1.014  
96A -> 98A -0.10743  
97A -> 98A 0.18227  
94B -> 97B 0.16281  
95B -> 97B 0.15373  
96B -> 97B 0.90096

This state for optimization and/or second-order correction.

Total Energy, E(TD-HF/TD-KS) = -1253.34591474

Copying the excited state density for this state as the 1-particle RhoCI density.

Excited State 2: 2.113-A 2.3991 eV 516.80 nm f=0.0154  
<S\*\*2>=0.866  
96A -> 98A -0.18107  
97A -> 98A 0.86336  
97A -> 99A 0.19389  
97A ->107A 0.18274  
94B -> 97B -0.10422  
96B -> 97B -0.21560

Excited State 3: 2.803-A 2.9884 eV 414.88 nm f=0.0144  
<S\*\*2>=1.714  
92A ->101A -0.12433  
92A ->111A 0.12700  
95A -> 98A -0.12133  
96A -> 99A 0.24293  
96A ->101A 0.12107  
97A -> 98A -0.21671  
97A -> 99A 0.69009  
92B -> 97B -0.24805  
95B -> 98B 0.11892  
96B -> 99B -0.30770

Excited State 4: 3.273-A 3.1894 eV 388.73 nm f=0.0095  
<S\*\*2>=2.429  
93A -> 98A -0.19261  
93A ->107A 0.11781  
94A ->104A -0.22392  
94A ->107A -0.10470  
95A -> 98A -0.28751  
95A ->101A 0.14744  
95A ->107A 0.10589  
96A -> 98A -0.28951  
97A -> 99A -0.11187  
90B ->108B -0.10883

|            |          |
|------------|----------|
| 93B ->103B | 0.10744  |
| 93B ->104B | 0.22411  |
| 94B -> 98B | -0.20983 |
| 94B ->108B | 0.14113  |
| 95B -> 97B | 0.32888  |
| 95B -> 98B | 0.27894  |
| 95B ->103B | -0.13725 |
| 95B ->108B | -0.11508 |
| 96B -> 97B | -0.20737 |
| 96B -> 98B | 0.38161  |
| 96B ->103B | 0.10200  |

Excited State 5: 2.097-A 3.3269 eV 372.67 nm f=0.0014  
 <S\*\*2>=0.849

|            |         |
|------------|---------|
| 91B -> 97B | 0.96162 |
|------------|---------|

## 8. Archive for (U)B3LYP/6-31G(2d,p) geometry optimization results

### 1a (X=H)

```
1\1\GINC-LOCALHOST\FOpt\UB3LYP\6-31G(2d,p)\C19H12N3O1(2)\PIOTR\14-Apr-
2016\0\#\#P UB3LYP/6-31G(2d,p) FOpt=tight freq(noraman) SCF=Direct #P G
eom=(NoDistance,NoAngle) fcheck\Parent C(8)-O-Ph(N1) benzotrazinyl (p
henazinoBT), Cs\0,2\N,-0.2279945082,0.,-0.7068912291\N,1.6342308182,0
.,1.3147774172\C,0.3141730381,0.,1.5107475896\N,-0.6511944713,0.,0.577
2813358\C,2.8747587314,0.,-2.6901553245\C,1.525294733,0.,-2.3786764485
\C,1.1192429656,0.,-1.0420625687\C,2.0563033272,0.,0.0130670541\C,3.42
27100243,0.,-0.320281521\C,3.8144680324,0.,-1.6500459807\C,-1.17991954
82,0.,-1.7366863092\C,-0.7265516782,0.,-3.0685289936\C,-1.6343949522,0
.,-4.1176431627\C,-3.0025964506,0.,-3.8542738611\C,-3.4580568847,0.,-2
.5364763795\C,-2.5535440658,0.,-1.48031653\C,-0.1674933344,0.,2.917057
1338\C,-1.5355202766,0.,3.2213939115\C,-1.9627296157,0.,4.5448686804\C
,-1.0320885266,0.,5.5834203093\C,0.3304717827,0.,5.2886511585\C,0.7611
634188,0.,3.9661225371\O,0.607802556,0.,-3.3994557106\H,4.1444354867,0
.,0.4875266765\H,-1.2474203049,0.,-5.1300423865\H,-4.5217388028,0.,-2.
3262246262\H,-2.8822307131,0.,-0.4505760941\H,-2.2557347868,0.,2.41322
96866\H,-3.0252780726,0.,4.7664014926\H,1.0608349088,0.,6.0915258161\H
,1.8160583604,0.,3.7224448829\H,4.8703351187,0.,-1.898622529\H,3.17536
91985,0.,-3.7308245809\H,-3.7063464888,0.,-4.6790512891\H,-1.367442019
2,0.,6.615759843\Version=ES64L-G09RevD.01\State=2-A\HF=-970.7339788\
S2=0.765494\S2-1=0.\S2A=0.750186\RMSD=4.138e-09\RMSF=1.718e-06\Dipole=
-0.2970498,0.,-0.7847295\Quadrupole=5.3068963,-9.8608619,4.5539655,0.,
-0.5464311,0.\PG=CS [SG(C19H12N3O1)]\
```

No imaginary frequencies.

### 1b (X=COOMe)

```
1\1\GINC-LOCALHOST\FOpt\UB3LYP\6-31G(2d,p)\C21H14N3O3(2)\PIOTR\05-May-
2021\0\#\#P UB3LYP/6-31G(2d,p) FOpt=tight freq(noraman) SCF=Direct #P G
eom=(NoDistance,NoAngle) fcheck\Parent flat C(8)-O-Ph(N1)-COOMe sec o
rient benzotrazinyl, Cs\0,2\N,-0.1596473134,0.8160516965,0.\N,-2.9064
525107,0.8778039954,0.\C,-2.181847753,-0.243293261,0.\N,-0.8429312268,
-0.3503453785,0.\C,-0.7194975137,4.455056265,0.\C,-0.0643532906,3.2360
070125,0.\C,-0.7979516254,2.048171105,0.\C,-2.2088626573,2.0544645993,
0.\C,-2.8608970603,3.3011702737,0.\C,-2.1217266261,4.4736162751,0.\C,1
.2433265276,0.7821689285,0.\C,1.9426315505,2.004936735,0.\C,3.33199069
```

14,2.0185823276,0.\C,4.0369449018,0.8225606862,0.\C,3.3524572652,-0.39  
71257489,0.\C,1.9560628523,-0.4154118111,0.\C,-2.918405793,-1.53391931  
21,0.\C,-2.2414470352,-2.7611649563,0.\C,-2.9519148157,-3.9566523906,0  
\C,-4.3464038964,-3.9452031559,0.\C,-5.026614316,-2.7283272085,0.\C,-  
4.3194785893,-1.5306801249,0.\O,1.3112996971,3.2194647631,0.\H,3.83634  
9017,2.9776968783,0.\H,1.4106564375,-1.3468569734,0.\H,-1.1589257281,-  
2.7670277305,0.\H,-2.4155560163,-4.9002262338,0.\H,-6.1118142075,-2.71  
156792,0.\H,-4.834804867,-0.5785239475,0.\H,-2.6324631427,5.4304729372  
,0.\H,-0.1366042534,5.3680135276,0.\H,5.1198370747,0.811693075,0.\H,-4  
.8989816889,-4.8794361818,0.\H,-3.9441261548,3.3094273495,0.\C,4.16146  
55494,-1.6454131672,0.\O,5.3714084956,-1.6734328415,0.\O,3.395474421,-  
2.7551687923,0.\C,4.1193370326,-3.9921703298,0.\H,3.3627129565,-4.7762  
866093,0.\H,4.7508133011,-4.0670060443,-0.8883829164\H,4.7508133011,-4  
.0670060443,0.8883829164\\Version=ES64L-G09RevD.01\State=2-A"\HF=-1198  
.624302\S2=0.765518\S2-1=0.\S2A=0.750183\RMSD=6.039e-09\RMSF=3.680e-06  
\Dipole=-0.1206689,0.2533919,0.\Quadrupole=-8.943009,15.7362829,-6.793  
2739,-0.1083726,0.,0.\PG=CS [SG(C21H12N3O3),X(H2)]\\  
No imaginary frequencies.

### 1c (X=CN)

1\1\GINC-LOCALHOST\FOpt\UB3LYP\6-31G(2d,p)\C20H11N4O1(2)\PIOTR\28-Jan-  
2019\0\#\#P UB3LYP/6-31G(2d,p) FOpt=tight freq(noraman) SCF=Direct #P G  
eom=(NoDistance,NoAngle) fcheck\\Parent flat C(8)-O-Ph(N1)-CN benzotra  
ziny1, Cs\\0,2\N,0.4918707959,-0.3073709472,0.\N,-1.9301161981,-1.5993  
15204,0.\C,-1.791350529,-0.2716071392,0.\N,-0.6428526579,0.4270485217,  
0.\C,1.6337807608,-3.8072972677,0.\C,1.6685437305,-2.4245914624,0.\C,0  
.4785524447,-1.6951606949,0.\C,-0.7780780973,-2.3354815524,0.\C,-0.798  
3291984,-3.7427877987,0.\C,0.3895854727,-4.4558136552,0.\C,1.726358092  
2,0.3539464615,0.\C,2.9039315435,-0.4204555594,0.\C,4.1484220382,0.196  
2930417,0.\C,4.2426785205,1.5821187079,0.\C,3.0759589325,2.3588732005,  
0.\C,1.8188939779,1.7436946847,0.\C,-3.030333523,0.5470735543,0.\C,-2.  
9807330234,1.9479003912,0.\C,-4.154452889,2.6935331395,0.\C,-5.3930969  
442,2.053054602,0.\C,-5.4505263192,0.6600599721,0.\C,-4.278893543,-0.0  
890666132,0.\O,2.8897323898,-1.7873119994,0.\H,5.0324681534,-0.4299667  
16,0.\H,0.9097894185,2.3272096033,0.\H,-2.0188705865,2.4444569437,0.\H  
, -4.1017954675,3.7774423221,0.\H,-6.4110840513,0.154960281,0.\H,-4.309  
2831729,-1.1712698284,0.\H,0.3652342955,-5.5400747517,0.\H,2.565248926  
7,-4.3600802229,0.\H,5.2125317008,2.0639104174,0.\H,-6.3080392627,2.63  
68796308,0.\H,-1.7614255903,-4.238551869,0.\C,3.1673740475,3.787994881  
7,0.\N,3.2484909322,4.9444164444,0.\\Version=ES64L-G09RevD.01\State=2-  
A"\HF=-1062.9763189\S2=0.766177\S2-1=0.\S2A=0.750198\RMSD=4.826e-09\RM  
SF=2.297e-06\Dipole=0.2829048,-1.8958087,0.\Quadrupole=10.8738161,-8.3  
206835,-2.5531326,-13.3808711,0.,0.\PG=CS [SG(C20H11N4O1)]\\  
No imaginary frequencies.

### 1d (X=NO<sub>2</sub>)

1\1\GINC-LOCALHOST\FOpt\UB3LYP\6-31G(2d,p)\C19H11N4O3(2)\PIOTR\21-Aug-  
2019\0\#\#P UB3LYP/6-31G(2d,p) FOpt=tight freq(noraman) SCF=Direct #P G  
eom=(NoDistance,NoAngle) fcheck\\Parent flat C(8)-O-Ph(N1)-NO2 benzotr  
azinyl, Cs\\0,2\N,0.1740075275,-0.5912901624,0.\N,-2.4796513212,-1.291  
9222227,0.\C,-2.0394489326,-0.0312808682,0.\N,-0.7609224979,0.38435639  
9,0.\C,0.4817664514,-4.2595262875,0.\C,0.8321536884,-2.9217720233,0.\C  
, -0.1578145215,-1.9384733571,0.\C,-1.5278131968,-2.2730914555,0.\C,-1.  
8705103077,-3.6383841063,0.\C,-0.8782093957,-4.6052405795,0.\C,1.52737  
27934,-0.2308669305,0.\C,2.4967632923,-1.256339851,0.\C,3.8517047621,-  
0.9450190871,0.\C,4.2648442238,0.3816429975,0.\C,3.2974400491,1.380915  
9148,0.\C,1.9365843962,1.0999181989,0.\C,-3.0560553157,1.0508987352,0.



\C,-2.6835702086,2.4022875514,0.\C,-3.6534376223,3.3987756193,0.\C,-5.0064804626,3.0615172225,0.\C,-5.3844716735,1.7195084307,0.\C,-4.4176805699,0.7199304577,0.\O,2.1680530385,-2.5810062532,0.\H,4.5662248069,-1.7592329262,0.\H,1.2073107099,1.8949660168,0.\H,-1.6329902242,2.6631739537,0.\H,-3.3516826377,4.4411296207,0.\H,-6.4357849167,1.4501868296,0.\H,-4.697401739,-0.3259222485,0.\H,-1.1508236683,-5.6549179771,0.\H,1.2615781678,-5.011250259,0.\H,5.3116543172,0.6513036899,0.\H,-5.7618725498,3.8408727586,0.\H,-2.9217795199,-3.8995169313,0.\N,3.7247375472,2.7851065546,0.\O,2.8523215908,3.6453586969,0.\O,4.9299247591,3.010235539,0.\Version=ES64L-G09RevD.01\State=2-A\HF=-1175.2435108\S2=0.765952\S2-1=0.\S2A=0.750189\RMSD=4.184e-09\RMSF=4.229e-06\Dipole=-0.2091194,-1.8865306,0.\Quadrupole=1.1105094,1.6616532,-2.7721626,-13.8781166,0.,0.\PG=CS [SG(C19H11N4O3)]\

No imaginary frequencies.

### 1e (X=CF<sub>3</sub>)

1\1\GINC-LOCALHOST\FOpt\UB3LYP/6-31G(2d,p)\C20H11F3N3O1(2)\PIOTR\29-Jan-2019\0\#P UB3LYP/6-31G(2d,p) FOpt=tight freq(noraman) SCF=Direct #P  
Geom=(NoDistance,NoAngle) fcheck\Parent flat C(8)-O-Ph(N1)-CF3 benzo  
traziny1, C1\0,2\N,-0.1511825702,-0.7509949659,0.0019305902\N,-2.8856873624,-1.0031244808,-0.0095345499\C,-2.2420152411,0.1661806642,-0.0112775541\N,-0.9130887467,0.3654554985,-0.0062244126\C,-0.4569389489,-4.4201578281,0.0205375413\C,0.1126783642,-3.159064103,0.0168938474\C,-0.7019592265,-2.025243303,0.0063016938\C,-2.1086733785,-2.1284797405,-0.0002568146\C,-2.6733309861,-3.4173945873,0.0035257033\C,-1.8547846494,-4.5354430062,0.0136968224\C,1.2435752303,-0.6202581221,0.0064562154\C,2.0280314682,-1.7896441254,0.0165159904\C,3.4131286808,-1.7029265695,0.0141324768\C,4.0344566611,-0.4582512982,0.0045368407\C,3.2597736991,0.7011386528,-0.0021748332\C,1.8701329319,0.6257291727,-0.005327117\C,-3.0667811749,1.4016640893,-0.0194401834\C,-2.4775806451,2.6734122756,-0.0187821689\C,-3.2699748244,3.8161427111,-0.026028447\C,-4.6600649847,3.706738791,-0.0341073286\C,-5.2534366959,2.4451069427,-0.0348664477\C,-4.4642502715,1.3000039063,-0.0275423477\O,1.4838198837,-3.0468046603,0.0238993996\H,3.9862300135,-2.6224234107,0.0155225003\H,1.2584773375,1.5159060056,-0.0230902134\H,-1.3983254582,2.7568665547,-0.0123207876\H,-2.8008421725,4.7947524333,-0.0253028393\H,-6.3347501874,2.3522356631,-0.0411201678\H,-4.9117633427,0.3141790815,-0.027881938\H,-2.2977873419,-5.5254437572,0.0165598427\H,0.1873570153,-5.2908484069,0.0286241174\H,5.1149003146,-0.3890425686,-0.0054167574\H,-5.2768496875,4.5998282391,-0.0397128231\H,-3.7533275269,-3.500698119,-0.0015250446\C,3.9272068681,2.0488325485,0.0404255855\F,5.1328994739,2.0241667973,-0.5566786147\F,3.1883115128,2.9932621553,-0.5679645904\F,4.1290667105,2.4669267749,1.3070168136\Version=ES64L-G09RevD.01\State=2-A\HF=-1307.7783212\S2=0.765834\S2-1=0.\S2A=0.75019\RMSD=2.392e-09\RMSF=2.207e-06\Dipole=0.0503094,-1.1256041,-0.0323563\Quadrupole=-0.2079404,7.135302,-6.9273616,-6.9090877,-0.2388503,-0.2194267\PG=C01 [X(C20H11F3N3O1)]\

No imaginary frequencies.

### 1f (X=OMe)

1\1\GINC-LOCALHOST\FOpt\UB3LYP/6-31G(2d,p)\C20H14N3O2(2)\PIOTR\05-May-2021\0\#P UB3LYP/6-31G(2d,p) FOpt=tight freq(noraman) SCF=Direct #P  
eom=(NoDistance,NoAngle) fcheck\Parent C(8)-O-Ph(N1)-10-OMe 2nd orint  
benzotraziny1 (phenazinoBT), Cs\0,2\N,-0.3633656011,0.4985416597,0.\N,-1.824449871,-1.8302987846,0.\C,-0.491581742,-1.7811693544,0.\N,0.287460985,-0.6872916609,0.\C,-3.7795730261,1.8789544623,0.\C,-2.3947221458,1.8221901105,0.\C,-1.7504617182,0.5818851911,0.\C,-2.4780727487,-0.6275457404,0.\C,-3.8819030796,-0.5513072773,0.\C,-4.5113188488,0.68433

68291,0.\C,0.3819200299,1.6845534658,0.\C,-0.3069404128,2.9060571541,0.  
. \C,0.4059715593,4.0985425137,0.\C,1.7929913799,4.0879469255,0.\C,2.48  
52354255,2.8684575665,0.\C,1.7816192351,1.6661963162,0.\C,0.2384403204  
, -3.0766140073,0.\C,1.6388727427, -3.1276582587,0.\C,2.2999146161, -4.35  
12184369,0.\C,1.573922273, -5.5418190832,0.\C,0.1804682304, -5.499494600  
8,0.\C, -0.4835359584, -4.2773179798,0.\O, -1.6823485163,2.9920047459,0.\  
H, -4.4429035763, -1.4779540306,0.\H, -0.1480822485,5.0300482044,0.\H,2.2  
705435771,0.7047829109,0.\H,2.1999194339, -2.2018367989,0.\H,3.38510135  
92, -4.3760196505,0.\H, -0.3919265612, -6.4216770275,0.\H, -1.5651234287, -  
4.2292052741,0.\H, -5.5949663365,0.7344505878,0.\H, -4.2664105303,2.8466  
074595,0.\H,2.3602818571,5.0106922782,0.\H,2.091410231, -6.4959458246,0.  
. \O,3.8414510994,2.9605356566,0.\C,4.5918315069,1.7578130846,0.\H,4.38  
67948655,1.1559409279, -0.8938912807\H,5.6404684445,2.0576946549,0.\H,4  
.3867948655,1.1559409279,0.8938912807\\Version=ES64L-G09RevD.01\State=  
2-A"\HF=-1085.2622773\S2=0.765743\S2-1=0.\S2A=0.750196\RMSD=9.070e-09\  
RMSF=2.338e-06\Dipole=0.4425064,0.4888984,0.\Quadrupole=8.8378866,0.20  
18879, -9.0397745, -3.6924413,0.,0.\PG=CS [SG(C20H12N3O2),X(H2)]\\  
No imaginary frequencies.

### 1g (X=F)

1\1\GINC-LOCALHOST\FOpt\UB3LYP\6-31G(2d,p)\C19H11F1N3O1(2)\PIOTR\06-Fe  
b-2020\0\#\#P UB3LYP/6-31G(2d,p) FOpt=tight freq(noraman) SCF=Direct #P  
Geom=(NoDistance,NoAngle) fcheck\\Parent C(8)-O-Ph(N1)-10-F benzotraz  
inyl (phenazinoBT), Cs\\0,2\N, -0.2272885354,0., -0.7084498124\N,1.63271  
81068,0.,1.3126939453\C,0.3129552766,0.,1.5096657224\N, -0.652090512,0.  
,0.5749367836\C,2.8766616423,0., -2.6906542686\C,1.5267046931,0., -2.381  
09589\C,1.12046217,0., -1.0444518059\C,2.0561061449,0.,0.0117056202\C,3  
.4229905843,0., -0.3200268849\C,3.815296485,0., -1.6494472746\C, -1.17681  
54404,0., -1.7362626825\C, -0.7249725337,0., -3.0692117177\C, -1.636786964  
7,0., -4.114363974\C, -3.0060913629,0., -3.8565392632\C, -3.43260467,0., -2  
.5350751023\C, -2.5477552924,0., -1.4697254298\C, -0.1691443289,0.,2.9153  
109363\C, -1.5373913342,0.,3.2192185787\C, -1.9646184139,0.,4.5426199041  
\C, -1.0339698995,0.,5.5810863262\C,0.3287728936,0.,5.2867088312\C,0.75  
96016594,0.,3.9643626043\O,0.6101741294,0., -3.4017738916\H,4.144014682  
9,0.,0.4883322305\H, -1.2563936765,0., -5.1289211151\H, -2.9001049147,0.,  
-0.4489028388\H, -2.2583349296,0.,2.4117034177\H, -3.0271493958,0.,4.763  
922495\H,1.058933596,0.,6.0897069795\H,1.8145747767,0.,3.721081174\H,4  
.8712941411,0., -1.8973991983\H,3.1788592321,0., -3.7308535179\H, -3.7327  
715305,0., -4.6591665406\H, -1.3695056707,0.,6.6133405233\F, -4.747647368  
7,0., -2.2751050839\\Version=ES64L-G09RevD.01\State=2-A"\HF=-1069.96740  
78\S2=0.765846\S2-1=0.\S2A=0.750194\RMSD=5.232e-09\RMSF=3.305e-06\Dipo  
le=0.2754869,0., -0.7770411\Quadrupole=-0.0585169, -7.8250385,7.8835554,  
0., -2.6157492,0.\PG=CS [SG(C19H11F1N3O1)]\\  
No imaginary frequencies.

### 1h (X=Cl)

1\1\GINC-LOCALHOST\FOpt\UB3LYP\6-31G(2d,p)\C19H11Cl1N3O1(2)\PIOTR\06-F  
eb-2020\0\#\#P UB3LYP/6-31G(2d,p) FOpt=tight freq(noraman) SCF=Direct #  
P Geom=(NoDistance,NoAngle) fcheck\\Parent C(8)-O-Ph(N1)-10-Cl benzotr  
azinyl (phenazinoBT), Cs\\0,2\N, -0.2274057698,0., -0.7077364119\N,1.632  
8614611,0.,1.3128845684\C,0.3130364968,0.,1.5105061823\N, -0.6520237868  
,0.,0.5756341802\C,2.875538267,0., -2.6911206312\C,1.5265490452,0., -2.3  
801432009\C,1.1200653845,0., -1.0438578913\C,2.0557791551,0.,0.01206529  
84\C,3.4227157341,0., -0.3206023561\C,3.8147395994,0., -1.6499319095\C, -  
1.1768841429,0., -1.7365876745\C, -0.7243268632,0., -3.0691275327\C, -1.63  
63999988,0., -4.1139544997\C, -3.0052770453,0., -3.856115391\C, -3.4416062  
047,0., -2.5342816557\C, -2.5482520982,0., -1.4712402659\C, -0.1688431383,

0.,2.9160701931\C,-1.5371364945,0.,3.2197879591\C,-1.9642914977,0.,4.5  
432195822\C,-1.0337193286,0.,5.5817380548\C,0.3290226295,0.,5.28746982  
3\C,0.7598800062,0.,3.9651176568\O,0.6078585143,0.,-3.4013940182\H,4.1  
440148003,0.,0.4875338244\H,-1.2573778897,0.,-5.1291175956\H,-2.886150  
3892,0.,-0.4457561007\H,-2.258426096,0.,2.4125777036\H,-3.0268214563,0  
.,4.7643844918\H,1.0592488231,0.,6.0903905663\H,1.8148509331,0.,3.7219  
93067\H,4.8706151079,0.,-1.898178345\H,3.177237728,0.,-3.731433379\H,-  
3.720101942,0.,-4.6688725906\H,-1.3693497906,0.,6.613932495\C1,-5.1631  
54053,0.,-2.1973803969\\Version=ES64L-G09RevD.01\State=2-A"\HF=-1430.3  
284514\S2=0.765997\S2-1=0.\S2A=0.750197\RMSD=7.175e-09\RMSF=2.619e-06\  
Dipole=0.5277029,0.,-0.7415643\Quadrupole=-0.6680879,-7.7530668,8.4211  
547,0.,-3.9883865,0.\PG=CS [SG(C19H11Cl1N3O1)]\\  
No imaginary frequencies.

### 1i (X=Br)

1\1\GINC-LOCALHOST\FOpt\UB3LYP\Gen\C19H11Br1N3O1(2)\PIOTR\12-Feb-2020\  
0\\#P UB3LYP/gen FOpt=tight freq(noraman) SCF=Direct #P Geom=(NoDistanc  
ce,NoAngle) fcheck Pseudo=Read\\Parent C(8)-O-Ph(N1)-10-Br benzotrazin  
yl (phenazinoBT), Cs\\0,2\N,-0.2214531861,0.7673371436,0.\N,-2.9643933  
868,0.9142058804,0.\C,-2.2758084713,-0.2293832557,0.\N,-0.9400701948,-  
0.3773767152,0.\C,-0.6693780072,4.424788142,0.\C,-0.0491545013,3.18565  
80399,0.\C,-0.8206969222,2.0202394086,0.\C,-2.2316269402,2.0690698837,  
0.\C,-2.8467098299,3.3357864389,0.\C,-2.0712548737,4.4855306431,0.\C,1  
.1766819576,0.6914193039,0.\C,1.9152657303,1.8903094487,0.\C,3.3028823  
748,1.8524458646,0.\C,3.9769187558,0.6318460509,0.\C,3.2360885274,-0.5  
47993683,0.\C,1.8466609895,-0.5362108252,0.\C,-3.0535207373,-1.4964855  
419,0.\C,-2.4163033281,-2.7457960481,0.\C,-3.1656724712,-3.9183911624,  
0.\C,-4.5598854556,-3.8612570242,0.\C,-5.2008565219,-2.622006871,0.\C,  
-4.4547148723,-1.447241926,0.\O,1.3227465269,3.127243505,0.\H,-3.92972  
64333,3.3769661227,0.\H,3.8450101121,2.7913625162,0.\H,1.2654506436,-1  
.4466378364,0.\H,-1.3340553126,-2.7881977771,0.\H,-2.6599702587,-4.879  
2534137,0.\H,-6.2854942244,-2.5699903908,0.\H,-4.9381995691,-0.4779531  
026,0.\H,-2.552666784,5.458117878,0.\H,-0.0592545626,5.3205099748,0.\H  
,5.0593543201,0.6046059431,0.\H,-5.1429872062,-4.7773725351,0.\Br,4.15  
22744421,-2.2387305797,0.\\Version=ES64L-G09RevD.01\State=2-A"\HF=-983  
.2804499\S2=0.766089\S2-1=0.\S2A=0.750199\RMSD=5.493e-09\RMSF=3.922e-0  
6\Dipole=0.1937034,0.9024497,0.\Quadrupole=0.1139045,7.9726182,-8.0865  
228,4.4618355,0.,0.\PG=CS [SG(C19H11Br1N3O1)]\\  
No imaginary frequencies.

### 1j (X=COMe)

1\1\GINC-LOCALHOST\FOpt\UB3LYP\6-31G(2d,p)\C21H14N3O2(2)\PIOTR\04-May-  
2021\0\\#P UB3LYP/6-31G(2d,p) FOpt=tight freq(noraman) SCF=Direct #P G  
eom=(NoDistance,NoAngle) fcheck\\Parent flat C(8)-O-Ph(N1)-COMe benzot  
razinyl, sec orient Ac, Cs\\0,2\N,-0.2088868957,0.6112797291,0.\N,2.41  
77644144,1.4157062451,0.\C,2.0252013889,0.1401987089,0.\N,0.765282501,  
-0.3265106365,0.\C,-0.6572816895,4.265593728,0.\C,-0.9572268129,2.9145  
240794,0.\C,0.0711876671,1.9702931292,0.\C,1.4271645501,2.3592496588,0  
\C,1.7167666123,3.7359437001,0.\C,0.6872409415,4.6639636341,0.\C,-1.5  
50109051,0.1990362901,0.\C,-2.5544413561,1.1851714903,0.\C,-3.89559095  
76,0.81830653,0.\C,-4.246641382,-0.5235295628,0.\C,-3.2598971777,-1.51  
87038841,0.\C,-1.9125065515,-1.1475551212,0.\C,3.0856594508,-0.9009273  
685,0.\C,2.7701981106,-2.266455356,0.\C,3.7797207607,-3.2228788485,0.\  
C,5.1179716456,-2.831009057,0.\C,5.4398935777,-1.4745840545,0.\C,4.432  
6896416,-0.5154503349,0.\O,-2.2767762778,2.5251928921,0.\H,-4.64222983  
9,1.603964904,0.\H,-1.1172623802,-1.8788973118,0.\H,1.7306000782,-2.56  
82430679,0.\H,3.5214309615,-4.2770399351,0.\H,6.4792324803,-1.16207064

63,0.\H,4.6685397815,0.5411558587,0.\H,0.9191183838,5.7234876542,0.\H,  
-1.4660814665,4.9860857244,0.\H,-5.2854407429,-0.8303091741,0.\H,5.904  
6923768,-3.5787447138,0.\H,2.7571527294,4.0376525258,0.\C,-3.699921573  
, -2.9498881529,0.\O,-4.8836726685,-3.2287851645,0.\C,-2.6435011955,-4.  
0391805127,0.\H,-1.9989875934,-3.9596526238,-0.8820643565\H,-1.9989875  
934,-3.9596526238,0.8820643565\H,-3.1418116504,-5.0085032952,0.\Version=ES64L-G09RevD.01\State=2-A"\HF=-1123.3887124\S2=0.765489\S2-1=0.\S2  
A=0.750183\RMSD=4.125e-09\RMSF=1.132e-06\Dipole=0.4014171,0.6724903,0.  
\Quadrupole=-7.0037245,10.2905007,-3.2867763,-10.69653,0.,0.\PG=CS [SG  
(C21H12N3O2),X(H2)]\@

No imaginary frequencies.

### 1l (X=NH<sub>2</sub>)

1\1\GINC-LOCALHOST\FOpt\UB3LYP\6-31G(2d,p)\C19H13N4O1(2)\PIOTR\21-Aug-  
2019\0\#P UB3LYP/6-31G(2d,p) FOpt=tight freq(noraman) SCF=Direct #P G  
eom=(NoDistance,NoAngle) fcheck\Parent flat C(8)-O-Ph(N1)-NH2 benzotr  
aziny1, C1\0,2\N,0.1857312541,-0.5836669205,-0.0147964334\N,-2.472508  
2021,-1.2860319717,0.0058234125\C,-2.0287820219,-0.0282014217,-0.00447  
08844\N,-0.7530581683,0.390215469,-0.0132237936\C,0.4864863447,-4.2565  
09212,-0.0027934636\C,0.84543663,-2.9173266945,-0.0105308678\C,-0.1470  
280621,-1.9326006403,-0.0073319714\C,-1.5182963977,-2.2677891451,0.003  
9643006\C,-1.8636268369,-3.6303565153,0.0119862836\C,-0.8714220721,-4.  
5994251566,0.008392021\C,1.5394701743,-0.2227976834,-0.020191918\C,2.5  
018759932,-1.2469817436,-0.0225626619\C,3.8487379103,-0.9191067545,-0.  
0237931522\C,4.2523764929,0.4112200026,-0.0234271115\C,3.3011450744,1.  
4438277854,-0.0212575912\C,1.9428031847,1.1124788995,-0.017617143\C,-3  
.0480440882,1.0545767961,-0.00572611\C,-2.679792783,2.4056005462,-0.05  
9268379\C,-3.6506344493,3.4014927558,-0.060504178\C,-5.0027420823,3.06  
45038378,-0.0076163729\C,-5.3771391708,1.7227006842,0.0455942838\C,-4.  
4085652558,0.7243394232,0.0459235586\O,2.17313617,-2.5865642516,-0.021  
2502073\H,4.5745991587,-1.7241459569,-0.0231079726\H,1.1790664485,1.87  
84706412,-0.0167920469\H,-1.629399819,2.6639527103,-0.102364199\H,-3.3  
512093395,4.4439526456,-0.1037903892\H,-6.4274852205,1.4520900403,0.08  
66176864\H,-4.6847043315,-0.3217802647,0.0855097651\H,-1.1463565005,-5  
.6488246306,0.0142812865\H,1.2654615104,-5.0092490436,-0.0057329952\H,  
5.3104508191,0.6521045867,-0.0300791787\H,-5.7591822919,3.8429682034,-  
0.0085830162\H,-2.915337369,-3.8897378437,0.0203475735\N,3.7028943413,  
2.781204576,-0.0872044058\H,3.0243867085,3.4349645579,0.2792946566\H,4  
.6172970871,2.9574633489,0.3062816149\Version=ES64L-G09RevD.01\State=  
2-A"\HF=-1026.0933031\S2=0.765659\S2-1=0.\S2A=0.750193\RMSD=8.397e-09\R  
MSF=1.530e-06\Dipole=1.170485,0.4215358,0.3996691\Quadrupole=5.0359232  
,6.9301694,-11.9660926,3.7440516,3.1816031,2.7700216\PG=C01 [X(C19H13N  
4O1)]\@

No imaginary frequencies.

### 1m (X=NHAc)

1\1\GINC-LOCALHOST\FOpt\UB3LYP\6-31G(2d,p)\C21H15N4O2(2)\PIOTR\07-May-  
2021\0\#P UB3LYP/6-31G(2d,p) FOpt=tight freq(noraman) SCF=Direct #P G  
eom=(NoDistance,NoAngle) fcheck guess=check\Parent flat C(8)-O-Ph(N1)  
-NHAc benzotraziny1, C1\0,2\N,0.3436971215,0.7247270029,-0.0028464104  
\N,3.0911126289,0.6933069417,0.0038505135\C,2.3293671128,-0.4015133934  
, -0.0007680321\N,0.9876283758,-0.4648207236,-0.0040319818\C,1.02901205  
42,4.3438376812,0.0062527886\C,0.3279026573,3.1485987344,0.0018470165\  
C,1.0228954636,1.9359978634,0.0012550064\C,2.4335762306,1.8940609901,0  
.004877964\C,3.128858235,3.1159498897,0.0093570891\C,2.4298234344,4.31  
35683841,0.0100172232\C,-1.0570691623,0.7399683577,-0.0054864157\C,-1.  
7151313475,1.9817313831,-0.0049872486\C,-3.1001660002,2.0221301594,-0.

0077529658\C,-3.8554918211,0.8527763553,-0.0107375265\C,-3.2022837311,  
-0.3881235426,-0.010542739\C,-1.8049921064,-0.4350796793,-0.0082290393  
\C,3.0243165776,-1.715970935,-0.0025946301\C,2.3100664933,-2.921600424  
6,-0.0099245149\C,2.9817178032,-4.139366929,-0.0116269896\C,4.37576827  
9,-4.1723352192,-0.0059931865\C,5.0936409869,-2.9773316634,0.001286388  
6\C,4.4246785126,-1.7578432407,0.0029530199\O,-1.0421219937,3.18220732  
97,-0.0019465319\H,-3.5850516407,2.991573949,-0.0076138996\H,-1.270766  
3193,-1.376513858,-0.0081027339\H,1.2279227254,-2.892600672,-0.0144260  
588\H,2.4158994897,-5.0656745567,-0.0174368817\H,6.1788469422,-2.99464  
8923,0.0056617508\H,4.9693553038,-0.8222178566,0.0085190031\H,2.973498  
7355,5.2522240591,0.0134952754\H,0.4783726287,5.2766589553,0.006698856  
2\H,-4.9335716798,0.8875975439,-0.0131403407\H,4.8986200067,-5.1235108  
167,-0.0073432931\H,4.2116904061,3.0866038926,0.0121644521\N,-3.883313  
7677,-1.6193921397,-0.013132242\H,-3.287740324,-2.433617363,-0.0082239  
285\C,-5.240729392,-1.8616112263,-0.0029229241\O,-6.0855531361,-0.9865  
74109,-0.008644209\C,-5.5933059259,-3.3407202809,0.0349192091\H,-5.028  
1471335,-3.9153149034,-0.7059343689\H,-5.374285828,-3.7579297995,1.023  
9696723\H,-6.6597538956,-3.444466217,-0.1611581362\\Version=ES64L-G09R  
evD.01\State=2-A\HF=-1178.7616394\S2=0.765494\S2-1=0.\S2A=0.750187\RMS  
D=3.091e-09\RMSF=6.556e-07\Dipole=0.0297059,-0.6275593,0.0273388\Quadr  
upole=-11.1414797,17.1288716,-5.9873919,7.7310182,-0.2453787,-0.110895  
1\PG=C01 [X(C21H15N4O2)]\@

No imaginary frequencies.

### 1n (X=I)

1\1\GINC-LOCALHOST\FOpt\UB3LYP\Gen\C19H11I1N3O1(2)\PIOTR\11-Feb-2020\O  
\#P UB3LYP/gen FOpt=tight freq(noraman) SCF=Direct #P Geom=(NoDistanc  
e,NoAngle) fcheck Pseudo=Read\\Parent C(8)-O-Ph(N1)-10-I benzotrazinyl  
(phenazinoBT), Cs\\0,2\N,-0.2224474548,0.768670183,0.\N,-2.9653629759  
,0.9156925308,0.\C,-2.2768591397,-0.2279584603,0.\N,-0.9411874793,-0.3  
758588676,0.\C,-0.6686589454,4.4257555226,0.\C,-0.0489027481,3.1864973  
091,0.\C,-0.8212413554,2.0214641532,0.\C,-2.2322462367,2.0705014336,0.  
\C,-2.8466697588,3.3374491012,0.\C,-2.0706212899,4.4868625016,0.\C,1.1  
759208147,0.6922423794,0.\C,1.9150277943,1.8902754488,0.\C,3.302535517  
,1.8504131178,0.\C,3.9754586186,0.6288277845,0.\C,3.2364810565,-0.5544  
192777,0.\C,1.8454523736,-0.5356769989,0.\C,-3.0535229485,-1.495776811  
5,0.\C,-2.4146013319,-2.7442376095,0.\C,-3.1623722642,-3.9178388411,0.  
\C,-4.5567048264,-3.862559775,0.\C,-5.1993357712,-2.6242459664,0.\C,-4  
.4547319248,-1.4484324569,0.\O,1.3233998242,3.1272412847,0.\H,-3.92967  
91378,3.3792216681,0.\H,3.8458056302,2.7888389494,0.\H,1.2564462332,-1  
.4410760044,0.\H,-1.332322523,-2.7850312793,0.\H,-2.6553119416,-4.8780  
024938,0.\H,-6.2840355841,-2.5737481609,0.\H,-4.939762723,-0.479898361  
6,0.\H,-2.5517834202,5.4595830302,0.\H,-0.0584451012,5.3214016158,0.\H  
,5.0583595057,0.6087415101,0.\H,-5.1384629062,-4.7795374635,0.\I,4.237  
0152299,-2.4149242056,0.\\Version=ES64L-G09RevD.01\State=2-A\HF=-981.  
4938655\S2=0.766052\S2-1=0.\S2A=0.750198\RMSD=9.723e-09\RMSF=1.863e-06  
\Dipole=0.233742,0.8358537,0.\Quadrupole=-0.2698729,9.041333,-8.771460  
1,3.0390022,0.,0.\PG=CS [SG(C19H11I1N3O1)]\@

No imaginary frequencies.

### 1o (X=OH)

1\1\GINC-LOCALHOST\FOpt\UB3LYP\6-31G(2d,p)\C19H12N3O2(2)\PIOTR\06-May-  
2021\O\#P UB3LYP/6-31G(2d,p) FOpt=tight freq(noraman) SCF=Direct #P G  
eom=(NoDistance,NoAngle) fcheck\\Parent C(8)-O-Ph(N1)-10-OH 2nd ornt  
benzotrazinyl (phenazinoBT), Cs\\0,2\N,-0.0797052931,0.5969250716,0.\N  
,-1.6996514839,-1.622756539,0.\C,-0.3666456122,-1.6680362644,0.\N,0.48  
72861285,-0.6312149831,0.\C,-3.3897221102,2.2141503632,0.\C,-2.0122498

294,2.060750726,0.\C,-1.4572149862,0.7779762824,0.\C,-2.2677467572,-0.3773267205,0.\C,-3.6628092973,-0.2030522698,0.\C,-4.2036350167,1.0738086023,0.\C,0.7468865165,1.7263184144,0.\C,0.1468519167,2.9963421012,0.\C,0.9409715629,4.1343869652,0.\C,2.3270870233,4.0299168742,0.\C,2.9250452984,2.7659866872,0.\C,2.1397448677,1.6163074347,0.\C,0.2702949969,-3.011459415,0.\C,1.6636522649,-3.16146059,0.\C,2.236425175,-4.4287469735,0.\C,1.4278693859,-5.5648498285,0.\C,0.0408806142,-5.424080462,0.\C,-0.5349065907,-4.157992745,0.\O,-1.2195587715,3.1774257634,0.\H,-4.2875360979,-1.087966434,0.\H,0.4524758583,5.1018734583,0.\H,2.5780831723,0.6264117147,0.\H,2.2890481907,-2.2778522639,0.\H,3.3171088984,-4.5303229085,0.\H,-0.5952144308,-6.3035014486,0.\H,-1.6103855872,-4.0335558699,0.\H,-5.2810496103,1.2000710067,0.\H,-3.8077630938,3.2134607144,0.\H,2.9548695258,4.9124813092,0.\H,1.8765857017,-6.5531803464,0.\O,4.2867252397,2.7193017612,0.\H,4.5714938405,1.7985254519,0.\\Version=ES64L-G09RevD.01\State=2-A\HF=-1045.9580301\S2=0.765697\S2-1=0.\S2A=0.750193\RMSD=2.875e-09\RMSF=4.789e-06\Dipole=0.2463683,0.3878941,0.\Quadropole=6.3996933,1.9819544,-8.3816477,-5.2024429,0.,0.\PG=CS [SG(C19H12N3O2)]\@

No imaginary frequencies.

### 1p (X=OBn)

1\1\GINC-LOCALHOST\FOpt\UB3LYP\6-31G(2d,p)\C26H18N3O2(2)\PIOTR\07-May-2021\0\#\#P UB3LYP/6-31G(2d,p) FOpt=tight freq(noraman) SCF=Direct #P Geom=(NoDistance,NoAngle) fcheck\Parent C(8)-O-Ph(N1)-10-OBn 2nd orient benzotrazinyl (phenazinoBT), C1\0,2\N,-1.7236151143,-0.6739409862,-0.0149607907\N,-4.2247124752,0.4665901651,0.0089230512\C,-3.085218189,1.1589512651,-0.0252763119\N,-1.8328291219,0.6741260023,-0.038130581\C,-3.8155196518,-3.7057757966,0.0753142614\C,-2.6908647189,-2.8965488495,0.0409213224\C,-2.8356612385,-1.5066232011,0.0192118513\C,-4.1085298295,-0.8971463097,0.031487944\C,-5.2384877421,-1.7330616991,0.0665871514\C,-5.0838477481,-3.1109152744,0.087855627\C,-0.4487633742,-1.2542019452,-0.022789116\C,-0.351608547,-2.6529436652,-0.0000933683\C,0.8996727394,-3.2565341927,-0.0052871861\C,2.0516200669,-2.4846709181,-0.0338317005\C,1.9589808783,-1.0856628516,-0.0570077994\C,0.7098883551,-0.4685221481,-0.0500854098\C,-3.1889663422,2.6420112885,-0.0524786534\C,-2.0489231597,3.4548247251,-0.1127686924\C,-2.1709464396,4.8399578718,-0.1379451688\C,-3.4317235065,5.4347001419,-0.102791381\C,-4.5707116985,4.6330207621,-0.0428307305\C,-4.4519572754,3.2474400887,-0.0181680649\O,-1.4522282825,-3.481344247,0.0285206404\H,-6.2167397078,-1.2679128299,0.0759636314\H,0.9497524824,-4.3390262778,0.0131876605\H,0.5879591047,0.6030166816,-0.0610358549\H,-1.0714516606,2.9904210962,-0.1410027747\H,-1.2794410342,5.457327182,-0.1856685511\H,-5.555607662,5.0883110429,-0.0152840567\H,-5.3277768412,2.6126433848,0.0276408698\H,-5.9608348831,-3.7488352652,0.1147983838\H,-3.6893667675,-4.7814988506,0.0918065872\H,3.0329111374,-2.9432941007,-0.0374799259\H,-3.5252153852,6.5159183484,-0.1223800693\O,3.1439927545,-0.4190551059,-0.0793142967\C,3.1215825615,1.0047898261,-0.1452251902\H,2.6234925976,1.4170079984,0.7421848262\H,2.5413867736,1.3161963993,-1.0266880579\C,4.539267398,1.5097888435,-0.2362357993\C,5.4826343669,0.8546781664,-1.033044039\C,4.9127547751,2.669339717,0.4449648374\C,6.7770576093,1.3542263611,-1.1446702801\C,6.2058520242,3.1759991429,0.3261019878\C,7.1415802697,2.518370692,-0.4685894553\H,5.1991965906,-0.0539920571,-1.5522221143\H,4.1890646623,3.1787955558,1.0751409828\H,7.5028840349,0.834225231,-1.7617574009\H,6.482469797,4.0780591024,0.8622607606\H,8.1508082475,2.9071087894,-0.5575086856\\Version=ES64L-G09RevD.01\State=2-A\HF=-1316.3237708\S2=0.765765\S2-1=0.\S2A=0.750196\RMSD=6.610e-09\RMSF=1.331e-06\Dipole=0.703628,-0.1956697,-0.0494546\Quadrupole=2.7653557,7.1419043,-9.9072599,6.1137531,-1.7915708,1.7072673\PG=C01 [X(C26H18N3O2)]\@

No imaginary frequencies.

### 1q (X=Ph)

```
1\1\GINC-LOCALHOST\FOpt\UB3LYP\6-31G(2d,p)\C25H16N3O1(2)\PIOTR\09-Feb-2020\0\#P UB3LYP/6-31G(2d,p) FOpt=tight freq(noraman) SCF=Direct #P Geom=(NoDistance,NoAngle) fcheck\Parent C(8)-O-Ph(N1)-10-Ph benzotrazinyl (phenazinoBT), C1\0,2\N,-0.2971786719,-1.2456028721,-1.0550575944\N,1.4980172435,-2.4699340769,0.628016017\C,0.1791606269,-2.4425177462,0.8299020214\N,-0.7544803062,-1.8653713235,0.0562727471\C,2.8477730959,-0.5256495653,-2.8323353764\C,1.4961105589,-0.5547513093,-2.5315802972\C,1.0527595978,-1.2045202316,-1.377019935\C,1.955010097,-1.8394624673,-0.4972685671\C,3.3241525449,-1.8006068335,-0.8168339991\C,3.7527315248,-1.1533090936,-1.9653754263\C,-1.2142211108,-0.6177599284,-1.9109267005\C,-0.7228923836,0.0203217632,-3.0637497715\C,-1.6030446287,0.6450700921,-3.9344444674\C,-2.9685680433,0.6409077799,-3.670457521\C,-3.48200933,0.0086751954,-2.5278744474\C,-2.5855217917,-0.6194496567,-1.6562351852\C,-0.3399578001,-3.1220133542,2.0457760117\C,-1.7117928763,-3.1674988092,2.3289781813\C,-2.1742059841,-3.8095351975,3.4727405436\C,-1.2753848362,-4.4149010769,4.3502913976\C,0.0907320782,-4.3741263655,4.0752678535\C,0.556561567,-3.7333462421,2.932029204\O,0.6126060636,0.061028913,-3.3826285735\H,4.0185750721,-2.2874725645,-0.1428784003\H,-1.1972102652,1.1386721737,-4.8099158579\H,-2.9357777101,-1.142680029,-0.7778981815\H,-2.4077399873,-2.6979281207,1.6455840647\H,-3.2393908903,-3.8380158635,3.679203087\H,0.7964322739,-4.8432494365,4.7534868428\H,1.6146044361,-3.6946740954,2.7057447703\H,4.810425373,-1.1280147378,-2.2046173382\H,3.1766335118,-0.0182380358,-3.7310857983\H,-3.6395651567,1.1588783695,-4.3459737223\H,-1.6380034556,-4.9155953791,5.2424794674\C,-4.9375937059,0.0062939337,-2.2444743333\C,-5.4170748848,0.1202300164,-0.9312042286\C,-5.8724925072,-0.1084465311,-3.2838709818\C,-6.7833231527,0.1189794552,-0.6666542738\C,-7.2388820197,-0.1084601212,-3.019857435\C,-7.7006023893,0.0050866426,-1.7097966843\H,-4.7118246277,0.2365244628,-0.1148854964\H,-5.5234871414,-0.226409092,-4.3044892576\H,-7.1315190893,0.2159170983,0.3567257881\H,-7.9437609702,-0.2066444576,-3.8393188461\H,-8.7658441788,0.0046175381,-1.5035354503\Version=ES64L-G09RevD.01\State=2-A\HF=-1201.8004269\S2=0.765616\S2-1=0.\S2A=0.75019\RMSD=3.318e-09\RMSF=2.208e-06\Dipole=-0.3452567,0.4263615,-0.6309491\Quadrupole=7.1726485,-9.0513744,1.878726,0.3010548,-3.0159191,-4.9317652\PG=C01 [X(C25H16N3O1)]\
```

No imaginary frequencies.

### 1r (X=thienyl)

```
1\1\GINC-LOCALHOST\FOpt\UB3LYP\6-31G(2d,p)\C23H14N3O1S1(2)\PIOTR\10-Feb-2020\0\#P UB3LYP/6-31G(2d,p) FOpt=tight freq(noraman) SCF=Direct #P Geom=(NoDistance,NoAngle) fcheck\Parent C(8)-O-Ph(N1)-10-Thio benzotrazinyl (phenazinoBT), C1\0,2\N,-0.5100749881,-2.2146382221,-2.1771872015\N,1.0764676153,-4.3784702938,-1.5823487388\C,-0.236448372,-4.3249826045,-1.3500317509\N,-1.0719078925,-3.3063054149,-1.6110011507\C,2.7528745816,-0.9596044368,-3.3366241669\C,1.3977516007,-1.005020143,-3.0544049175\C,0.8454408024,-2.1472016808,-2.4697983587\C,1.6395889668,-3.2703171237,-2.1542981975\C,3.0138723192,-3.2081705935,-2.4469455762\C,3.5510163072,-2.0695927052,-3.0273593979\C,-1.3208689403,-1.1100910165,-2.4769649018\C,-0.7218151374,0.0168994085,-3.0685434969\C,-1.4968445007,1.1227196434,-3.3846668208\C,-2.860189399,1.1239986407,-3.1130305473\C,-3.4796668491,0.0082851929,-2.5269309556\C,-2.6905034735,-1.1085215502,-2.2205805022\C,-0.8695936971,-5.518498772,-0.7304915862\C,-2.246233018,-5.5637898694,-0.4719192783\C,-2.8174606713,-6.6911860607,0.1081899868\C,-2.0239396537,-7.7891406302,0.4389818904\C,-0.6537216246,-
```

7.7517959557,0.1845977388\C,-0.0792624018,-6.626020712,-0.3960230537\O  
,0.6184944334,0.0835910031,-3.358510602\H,3.6256922267,-4.0689793578,-  
2.2059154643\H,-1.0107610069,1.980658896,-3.8343860752\H,-3.1278032733  
, -2.0018428827, -1.7987844896\H, -2.8599449246, -4.7104454355, -0.73082673  
85\H, -3.8851544432, -6.7133341667, 0.302019734\H, -0.0297102667, -8.602615  
6153, 0.4390450021\H, 0.983203994, -6.5835638658, -0.5998446998\H, 4.611868  
7764, -2.0297267387, -3.2500031649\H, 3.1670626991, -0.0674098739, -3.79027  
53845\H, -3.4436234939, 2.0092099359, -3.3401232932\H, -2.4712874388, -8.66  
83817253, 0.8917223533\C, -4.9140201227, -0.0085638879, -2.2251302543\C, -5  
.5761612808, -0.7189513669, -1.251496788\C, -6.9815959937, -0.5025951935, -  
1.2418943487\C, -7.3887389431, 0.3717181344, -2.2101014373\S, -6.054982468  
4, 0.9378270752, -3.1524125197\H, -5.0629464658, -1.3572392699, -0.54297358  
09\H, -7.6571183877, -0.9731265834, -0.5382624749\H, -8.3876063241, 0.71708  
34882, -2.4306249799\\Version=ES64L-G09RevD.01\State=2-A\HF=-1522.55560  
1\S2=0.76587\S2-1=0.\S2A=0.750197\RMSD=2.447e-09\RMSF=2.208e-06\Dipole  
=-0.2130941,0.5711108,-0.0645579\Quadrupole=9.1781672,-1.5693477,-7.60  
88195,1.983991,-5.4402635,-5.1294693\PG=C01 [X(C23H14N3O1S1)]\\  
No imaginary frequencies.

### 1s (X=CCPh)

1\1\GINC-LOCALHOST\FOpt\UB3LYP\6-31G(2d,p)\C27H16N3O1(2)\PIOTR\14-Feb-  
2020\0\#P UB3LYP/6-31G(2d,p) FOpt=tight freq(noraman) SCF=Direct #P G  
eom=(NoDistance,NoAngle) fcheck\\Parent C(8)-O-Ph(N1)-10-CCPh benzotra  
zinyll (phenazinoBT), Cs\\0,2\N,0.7276841485,1.6986784905,0.\N,-0.78675  
67277,3.9915911126,0.\C,-1.2950427192,2.7574130416,0.\N,-0.6204964611,  
1.596085887,0.\C,3.3985999406,4.2340927276,0.\C,2.7715571274,2.9995586  
808,0.\C,1.3768768789,2.9255783237,0.\C,0.5778128642,4.0885311606,0.\C  
,1.2296876492,5.3350253376,0.\C,2.6145261269,5.3962025123,0.\C,1.49859  
70175,0.5268385341,0.\C,2.9010504055,0.6493915094,0.\C,3.698783198,-0.  
4869814404,0.\C,3.1195942932,-1.7489243521,0.\C,1.7199655557,-1.891173  
679,0.\C,0.9181145215,-0.7392478526,0.\C,-2.7755575962,2.6281338923,0.  
\C,-3.3995723792,1.3731849309,0.\C,-4.786927912,1.2770584848,0.\C,-5.5  
711847509,2.4301047304,0.\C,-4.9576882652,3.6819763691,0.\C,-3.5704476  
835,3.7818986557,0.\O,3.5418150763,1.8621794216,0.\H,0.6187672266,6.22  
9550761,0.\H,4.7749468906,-0.3589910982,0.\H,-0.1592632645,-0.81648699  
57,0.\H,-2.7888111177,0.4794011608,0.\H,-5.2575463398,0.2990238039,0.\H  
, -5.5613603263, 4.5839503708, 0.\H, -3.0804145758, 4.7473103717, 0.\H, 3.10  
94788498, 6.3613841942, 0.\H, 4.4809993763, 4.2759180651, 0.\H, 3.7451172198  
, -2.6332527051, 0.\H, -6.6538617179, 2.3527135553, 0.\C, 1.123006032, -3.182  
5270184, 0.\C, 0.6179015402, -4.2856952506, 0.\C, 0.0201909143, -5.577843299  
7, 0.\C, -1.3795254302, -5.7172582548, 0.\C, 0.8182264325, -6.7361503589, 0.\C  
, -1.959692119, -6.9800784604, 0.\C, 0.2296917828, -7.995156418, 0.\C, -1.15  
93394022, -8.1225275223, 0.\H, -1.9980934794, -4.8268496548, 0.\H, 1.8975517  
113, -6.6328158168, 0.\H, -3.0408582542, -7.0733537829, 0.\H, 0.857270616, -8  
.8804484502, 0.\H, -1.615758164, -9.1068448443, 0.\\Version=ES64L-G09RevD.  
01\State=2-A\HF=-1277.9574937\S2=0.766056\S2-1=0.\S2A=0.750202\RMSD=2  
.043e-09\RMSF=4.718e-07\Dipole=0.5946377,-0.48837,0.\Quadrupole=6.7679  
82,8.208763,-14.976745,5.8086655,0.,0.\PG=CS [SG(C27H16N3O1)]\\  
No imaginary frequencies.

### 1t (X=OAc)

1\1\GINC-LOCALHOST\FOpt\UB3LYP\6-31G(2d,p)\C21H14N3O3(2)\PIOTR\27-Sep-  
2020\0\#P UB3LYP/6-31G(2d,p) FOpt=tight freq(noraman) SCF=Direct #P G  
eom=(NoDistance,NoAngle) fcheck\\Parent C(8)-O-Ph(N1)-10-OAc benzotraz  
inyll (phenazinoBT), C1\\0,2\N,0.0162894508,0.6301359637,-0.0385883945\  
N,-2.5959053823,-0.2176247815,0.0298982997\C,-1.5421607761,-1.03617695  
9,0.0304617753\N,-0.2430336138,-0.6962244007,-0.0014674561\C,-1.715730



634,3.8799171423,-0.088017912\C,-0.6916424333,2.9474491368,-0.08378503  
96\C,-0.9930866872,1.5838251812,-0.0439782252\C,-2.3265090205,1.123498  
2505,-0.0079106787\C,-3.3543281889,2.0834543556,-0.0127588009\C,-3.044  
1524336,3.4340317539,-0.0520242534\C,1.3483191721,1.0613783854,-0.0720  
402973\C,1.6072312009,2.4428669804,-0.1128819588\C,2.9149091904,2.9032  
763276,-0.1514853522\C,3.9831850427,2.009988479,-0.1494319962\C,3.7168  
672353,0.643355995,-0.1021590346\C,2.4154804665,0.1624283146,-0.063252  
1339\C,-1.8117134249,-2.4973499583,0.0701505522\C,-0.768449689,-3.4331  
42257,0.0745179858\C,-1.0445777711,-4.7956204286,0.1120558905\C,-2.364  
5319639,-5.2441293483,0.1458074387\C,-3.4077355301,-4.3193284066,0.141  
5730329\C,-3.1351431165,-2.9559529373,0.1041846511\O,0.607840462,3.387  
0269105,-0.1200851432\H,-4.3790628088,1.7333860128,0.0149534854\H,3.08  
23812017,3.9733521642,-0.1842611657\H,2.218865888,-0.8991778043,-0.033  
3393159\H,0.2552986293,-3.0822555133,0.0483566788\H,-0.2270843555,-5.5  
095931633,0.1149830552\H,-4.4376724238,-4.6607308234,0.1676127107\H,-3  
.9352823641,-2.2266298728,0.1008371286\H,-3.842633771,4.1682184245,-0.  
0551753174\H,-1.4683108716,4.9340364183,-0.1187889309\H,5.0006086691,2  
.3724151491,-0.1746416649\H,-2.5781463838,-6.3079235543,0.1751229873\O  
,4.7145362203,-0.3230393394,-0.1728066568\C,5.8227470089,-0.234220838,  
0.6291390379\O,6.0207301649,0.6515434861,1.4140864813\C,6.7272121236,-  
1.4096094707,0.3659678717\H,6.1978218241,-2.342965555,0.5773420939\H,7  
.0146588128,-1.4310414123,-0.6890385767\H,7.6128850905,-1.3313235472,0  
.994782018\\Version=ES64L-G09RevD.01\State=2-A\HF=-1198.6203984\S2=0.7  
65645\S2-1=0.\S2A=0.750189\RMSD=1.932e-09\RMSF=6.925e-07\Dipole=0.4960  
087,0.0654465,-0.4502107\Quadrupole=3.3201283,7.5366976,-10.8568259,-8  
.1856253,-5.281074,-2.3547451\PG=C01 [X(C21H14N3O3)]\\

No imaginary frequencies.

### 1u (X=NHCOCF<sub>3</sub>)

1\1\GINC-LOCALHOST\FOpt\UB3LYP/6-31G(2d,p)\C21H12F3N4O2(2)\PIOTR\09-Ma  
y-2021\0\#P UB3LYP/6-31G(2d,p) FOpt=tight freq(noraman) SCF=Direct #P  
Geom=(NoDistance,NoAngle) fcheck\\Parent flat C(8)-O-Ph(N1)-10-NHCOCF  
3 2nd orient benzotrazinyl, C1\\0,2\N,1.2710187132,-0.8598085029,0.000  
0036279\N,3.6469137627,0.5168312149,-0.000014895\C,2.4461126557,1.0977  
332315,-0.0000179467\N,1.2462108787,0.4924596514,-0.0000075953\C,3.644  
777066,-3.6756326933,0.0000260833\C,2.4482733654,-2.9785478149,0.00002  
33615\C,2.4574534068,-1.5813665306,0.0000087439\C,3.6647702138,-0.8514  
218078,-0.0000021811\C,4.8710433444,-1.5744918415,0.0000006863\C,4.850  
5458893,-2.9605665176,0.0000143565\C,0.0594820431,-1.5607992316,0.0000  
020636\C,0.0953940349,-2.9669852818,0.0000179464\C,-1.0897254348,-3.68  
54426698,0.0000151025\C,-2.3224618485,-3.0385759447,-0.0000070038\C,-2  
.3578732078,-1.6389836329,-0.0000272438\C,-1.1693156334,-0.9052403708,  
-0.0000199383\C,2.4059373727,2.5834111709,-0.0000130585\C,1.1919045436  
,3.2835461932,0.0000120291\C,1.1800238163,4.6741869951,0.0000166388\C,  
2.3787697802,5.3864875636,-0.0000037794\C,3.5906441813,4.6973883784,-0  
.0000284484\C,3.6058950338,3.3066545659,-0.0000325435\O,1.268880731,-3  
.6805877522,0.0000360122\H,-1.0336368818,-4.7677063698,0.0000290109\H,  
-1.1700568289,0.1770943304,-0.0000367567\H,0.2623054466,2.7288522118,0  
.0000287774\H,0.2325849365,5.2036774202,0.0000365468\H,4.5277846947,5.  
2447801264,-0.0000443566\H,4.5397033478,2.7589097313,-0.0000511492\H,5  
.7850773352,-3.5111294867,0.0000162566\H,3.6238300519,-4.7586106122,0.  
000037081\H,-3.2431440626,-3.6011906199,-0.0000111834\H,2.3676755271,6  
.4717849174,-0.0000001387\H,5.7998181939,-1.0170646353,-0.0000080291\N  
, -3.5612553846,-0.9023936074,-0.0000640889\H,-3.4670153013,0.102833068  
2,-0.0000606288\C,-4.835203126,-1.3748116216,-0.0001182399\O,-5.198691  
1787,-2.5310815196,-0.0001073601\C,-5.9069047089,-0.2546737964,-0.0002  
552451\F,-6.6782918089,-0.3599256872,1.0817571921\F,-5.3616635163,0.98  
5480763,0.000022801\F,-6.6777299239,-0.3596740349,-1.0827024377\\Versi

on=ES64L-G09RevD.01\State=2-A\HF=-1476.4760905\S2=0.765777\S2-1=0.\S2A=0.750192\RMSD=8.742e-09\RMSF=2.867e-06\Dipole=0.877358,0.0317089,0.0000633\Quadrupole=-7.8664746,10.1530096,-2.286535,-10.9601059,-0.0007458,-0.0001726\PG=C01 [X(C21H12F3N4O2)]\@  
No imaginary frequencies.

### 1v (X=NHCOOMe)

1\1\GINC-LOCALHOST\FOpt\UB3LYP\6-31G(2d,p)\C21H15N4O3(2)\PIOTR\09-May-2021\0\#P UB3LYP/6-31G(2d,p) FOpt=tight freq(noraman) SCF=Direct #P Geom=(NoDistance,NoAngle) fcheck\Parent flat C(8)-O-Ph(N1)-10-NHCOOMe 2nd orient benzotrazinyl, C1\0,2\N,-0.7310286981,-0.8863007903,0.0000025866\N,-3.1628247015,0.3927253433,0.0000052658\C,-1.9860712203,1.0205785698,0.0000051157\N,-0.7627931118,0.4658527552,0.0000028761\C,-2.9893505946,-3.7966272572,0.0000056396\C,-1.8207830884,-3.0518115116,0.0000040444\C,-1.8874352404,-1.6556745088,0.0000042499\C,-3.1241760336,-0.9755861487,0.00000558\C,-4.2996018984,-1.7469497906,0.0000068896\C,-4.2225527808,-3.131479747,0.000007049\C,0.5090547814,-1.5373833488,-0.00000149\C,0.5293656322,-2.9423923207,-0.0000005909\C,1.7440715759,-3.6091322193,-0.0000042829\C,2.9483762998,-2.9113063089,-0.0000083169\C,2.9310632737,-1.5098282942,-0.0000081982\C,1.7097341845,-0.830629823,-0.0000034199\C,-2.0059771575,2.5071899382,-0.0000000554\C,-0.8206370491,3.2546869958,-0.0000023337\C,-0.8635614862,4.6447031643,-0.0000066749\C,-2.0893555561,5.3095191055,-0.0000091812\C,-3.2730572981,4.5730649956,-0.0000072299\C,-3.2334033878,3.1827226025,-0.0000027062\O,-0.6163756449,-3.7054300308,0.0000016479\H,1.7344516696,-4.6930105639,-0.0000047704\H,1.6645438711,0.2505990014,-0.0000035894\H,0.1295348709,2.7359944863,-0.0000003174\H,0.0623576968,5.211142319,-0.0000081185\H,-4.2311803074,5.0829800456,-0.0000092158\H,-4.14462637,2.5980285636,-0.0000011127\H,-5.134108403,-3.7195167381,0.0000080005\H,-2.9241838433,-4.8778807168,0.0000054224\H,3.891964102,-3.4350062461,-0.0000120241\H,-2.1210892275,6.3944661259,-0.0000126688\H,-5.2504247611,-1.2280085208,0.0000077281\N,4.0965367524,-0.7265210636,-0.0000144006\H,3.9720475771,0.2743580726,-0.0000150091\C,5.4008813173,-1.1475908122,-0.0000252965\O,5.7994550344,-2.2903785868,-0.0000282382\O,6.2043590248,-0.0552470808,-0.0000317122\C,7.6058437773,-0.348522387,-0.0000438682\H,7.881159472,-0.920494686,0.8890974185\H,7.8811517904,-0.9204563881,-0.8892124718\H,8.1062596963,0.6196361757,-0.000025971\Version=ES64L-G09RevD.01\State=2-A\HF=-1253.9902246\S2=0.765535\S2-1=0.\S2A=0.750188\RMSD=4.290e-09\RMSF=1.822e-06\Dipole=0.6466657,0.2122292,-0.0000049\Quadrupole=7.704637,1.5659275,-9.2705646,11.5967341,-0.0000526,-0.0000631\PG=C01 [X(C21H15N4O3)]\@

No imaginary frequencies.

### 1a-leuco (X=H)

1\1\GINC-LOCALHOST\FOpt\RB3LYP\6-31G(2d,p)\C19H13N3O1\PIOTR\06-Apr-2019\0\#P B3LYP/6-31G(2d,p) FOpt=tight freq(noraman) SCF=Direct #P Geom=(NoDistance,NoAngle) fcheck\Parent C(8)-O-Ph(N1) benzotrazinyl-4H (phenazinoBT), C1\0,1\N,0.0167277772,0.7451214957,0.3708922059\N,1.1548623131,-1.7161458632,0.38724341\C,-0.2270204202,-1.5189771724,0.207042782\N,-0.7915675717,-0.3619473404,0.2038294813\C,3.5393804118,1.6655850455,-0.3518977142\C,2.1697159592,1.7792579174,-0.1172916585\C,1.3999992908,0.6471106849,0.1169281347\C,1.9968058361,-0.6117489938,0.1148698238\C,3.3587537463,-0.7394560519,-0.1315097284\C,4.1262518644,0.4055593009,-0.3609443181\C,-0.5804547593,2.0089483589,0.2603083741\C,0.2395327719,3.1294250841,0.0391826494\C,-0.3047499695,4.4002592318,-0.0453814167\C,-1.6819154183,4.5840038847,0.08716088\C,-2.501989242,3.4812646818,0.3006540108\C,-1.9568473231,2.2008277216,0.3867527469\C,-1.06570399

38,-2.7232846194,0.0564529698\C,-2.329136759,-2.6303749526,-0.54657280  
95\C,-3.1232880971,-3.7597415302,-0.6938195705\C,-2.6730277563,-5.0032  
086685,-0.2454452161\C,-1.423660435,-5.1048711895,0.359785964\C,-0.624  
0384014,-3.9741342687,0.5112414451\O,1.6151069955,3.0326801997,-0.1054  
959669\H,3.816435608,-1.7233824153,-0.1320347781\H,0.3669148998,5.2329  
813717,-0.2215270072\H,-3.5742999623,3.6085030655,0.404122909\H,-2.582  
2242991,1.3336596503,0.5511865113\H,-2.6652766995,-1.6635665284,-0.900  
8327962\H,-4.0957029009,-3.6727963027,-1.1676713577\H,-1.0698628825,-6  
.0638450789,0.7240548013\H,0.3276278129,-4.0629926599,1.0246553126\H,5  
.1910639475,0.3100480123,-0.5408698002\H,4.1156426437,2.5675354243,-0.  
5194287141\H,-2.1006221952,5.5819369698,0.0217749758\H,-3.2939311296,-  
5.8846798643,-0.366853654\H,1.4908343576,-2.5924113106,0.0106096488\\V  
ersion=ES64L-G09RevD.01\State=1-A\HF=-971.3414708\RMSD=3.532e-09\RMSF=  
7.946e-07\Dipole=0.2702364,-1.0986145,-0.3057615\Quadrupole=3.5557137,  
6.1188852,-9.6745989,-0.882348,0.350537,-0.403506\PG=C01 [X(C19H13N3O1  
)]\

No imaginary frequencies.

### 1b-leuco (X=COOMe)

1\1\GINC-LOCALHOST\FOpt\RB3LYP\6-31G(2d,p)\C21H15N3O3\PIOTR\06-May-202  
1\0\#\#P B3LYP/6-31G(2d,p) FOpt=tight freq(noraman) SCF=Direct #P Geom=  
(NoDistance,NoAngle) fcheck\Parent flat C(8)-O-Ph(N1)-COOMe benzotraz  
inyl 4H, C1\0,1\N,0.2737290629,0.739901808,-0.3005789197\N,2.98182799  
79,0.7582669409,-0.4174393953\C,2.2407666574,-0.4126685411,-0.17551278  
97\N,0.9551406783,-0.4497646061,-0.1231961903\C,0.9096221294,4.3491080  
433,0.2815335991\C,0.2376625744,3.1403814573,0.1125726969\C,0.94185465  
49,1.9654444728,-0.1103810027\C,2.3340035074,1.9894996144,-0.162024221  
5\C,3.0180225438,3.185976112,0.0190623539\C,2.2991269597,4.3643275915,  
0.2368620916\C,-1.1182089122,0.7202436751,-0.1374020544\C,-1.792968063  
8,1.938357351,0.0714434849\C,-3.1733746958,1.9713401724,0.2064930744\C  
,-3.9099894023,0.7941594734,0.1391734463\C,-3.2546444933,-0.4216135716  
, -0.0612523479\C,-1.8612185956,-0.4550729493,-0.1988135156\C,2.9979450  
117,-1.6688874751,-0.0143356262\C,2.4167315645,-2.7587779736,0.6507738  
215\C,3.1227358856,-3.9439875213,0.808062512\C,4.4205154104,-4.0643758  
913,0.307069412\C,5.0034276949,-2.9907331826,-0.3601919211\C,4.2986357  
196,-1.7999085199,-0.5214380023\O,-1.1362878428,3.1484826825,0.1537225  
307\H,-3.6493343087,2.9313787946,0.3701120665\H,-1.3448387172,-1.39079  
28652,-0.352982835\H,1.4129227399,-2.6525763794,1.0435583914\H,2.66250  
65855,-4.7765978581,1.3300739894\H,6.0062605262,-3.0789596649,-0.76508  
55396\H,4.750262488,-0.9881091726,-1.0819926833\H,2.8305197586,5.30034  
48894,0.3656354071\H,0.3309106568,5.250794348,0.4414164025\H,-4.987835  
4969,0.7995161474,0.2413097278\H,4.9712528968,-4.9903228435,0.43575197  
33\H,4.1023418407,3.1979879385,-0.0212178588\C,-4.0826776467,-1.652826  
9405,-0.1249941848\O,-5.2884923566,-1.6782411711,-0.0153555881\O,-3.34  
0928648,-2.7657301745,-0.3225168647\C,-4.0877217297,-3.9842355984,-0.3  
975546808\H,-3.3523248597,-4.7721698192,-0.5603270569\H,-4.6369884357,  
-4.1580365498,0.5310813102\H,-4.8010963519,-3.9491299328,-1.2246083504  
\H,3.9340454014,0.7136306892,-0.0804037424\\Version=ES64L-G09RevD.01\S  
tate=1-A\HF=-1199.2328528\RMSD=3.648e-09\RMSF=7.899e-07\Dipole=2.08856  
68,-0.142675,0.2024914\Quadrupole=-2.75298,10.524139,-7.771159,-0.2527  
713,0.2406442,0.313051\PG=C01 [X(C21H15N3O3)]\

No imaginary frequencies.

### 1c-leuco (X=CN)

1\1\GINC-LOCALHOST\FOpt\RB3LYP\6-31G(2d,p)\C20H12N4O1\PIOTR\08-Apr-201  
9\0\#\#P B3LYP/6-31G(2d,p) FOpt=tight freq(noraman) SCF=Direct #P Geom=  
(NoDistance,NoAngle) fcheck\Parent flat C(8)-O-Ph(N1)-CN benzotraziny

1 4H, C1\0,1\N,-0.0069506008,-0.5901947333,-0.3282416145\N,-2.3536649  
97,0.7676054778,-0.3513826988\C,-1.1129182724,1.4030864685,-0.18243454  
58\N,0.0168109879,0.7850834415,-0.1773298766\C,-2.361709455,-3.3828506  
803,0.3180875232\C,-1.1779754774,-2.6795295534,0.1091219479\C,-1.19753  
32168,-1.3083353084,-0.1007588971\C,-2.4099315167,-0.6224535034,-0.103  
4559141\C,-3.5984497293,-1.3094039096,0.1163058757\C,-3.567829008,-2.6  
90737421,0.323910268\C,1.2039599427,-1.2752558326,-0.2180385268\C,1.17  
88924387,-2.6710492861,-0.0206138013\C,2.3566498693,-3.396912732,0.065  
3894592\C,3.5884058472,-2.7579066241,-0.0387517193\C,3.6259299976,-1.3  
73042554,-0.2263893317\C,2.4358488957,-0.6348069192,-0.3149221376\C,-1  
.1227712886,2.8721954546,-0.042303557\C,-0.0442751564,3.5261445942,0.5  
712859796\C,-0.0466121395,4.9080765152,0.7074858139\C,-1.1235825135,5.  
6614357039,0.2365918006\C,-2.1957893318,5.0218059074,-0.3793294407\C,-  
2.197464297,3.6358854411,-0.5193566088\O,0.0052030945,-3.382424044,0.0  
980240078\H,2.2887631673,-4.4671398162,0.2216802987\H,2.4582456242,0.4  
360620178,-0.4583532461\H,0.7824810407,2.9328021423,0.9421172681\H,0.7  
919770902,5.4004250681,1.1887496113\H,-3.0307267978,5.600163076,-0.760  
8888186\H,-3.0190676016,3.1561394425,-1.0409319728\H,-4.4949324343,-3.  
2290584424,0.4839154368\H,-2.3144514535,-4.4545989606,0.4680465522\H,4  
.508858131,-3.3240906592,0.0279044258\H,-1.1239458518,6.7406220884,0.3  
483682412\H,-4.5402722602,-0.7706007858,0.1143155775\C,4.8846113292,-0  
.6979699476,-0.328647149\N,5.9061032675,-0.1548878166,-0.4095103574\H,  
-3.1372136143,1.2920057904,0.0130542464\\Version=ES64L-G09RevD.01\Stat  
e=1-A\HF=-1063.5870263\RMSD=5.724e-09\RMSF=1.013e-06\Dipole=-2.9144592  
,0.1518635,0.4542467\Quadrupole=-14.0838188,16.9772445,-2.8934257,-6.3  
360503,2.4617314,0.0785809\PG=C01 [X(C20H12N4O1)]\

No imaginary frequencies.

### 1d-leuco (X=NO<sub>2</sub>)

1\1\GINC-LOCALHOST\FOpt\RB3LYP\6-31G(2d,p)\C19H12N4O3\PIOTR\21-Aug-201  
9\0\#P B3LYP/6-31G(2d,p) Opt=(tight, ReadFC) freq(noraman, ReadIso) #  
P Geom=(NoDistance,NoAngle) fcheck guess=check\\Parent flat C(8)-O-Ph(  
N1)-NO2 benzotrazinyl 4H, C1\0,1\N,0.2413745445,0.7487165884,-0.25457  
36698\N,2.9529050818,0.7398707176,-0.3476853503\C,2.1970960549,-0.4261  
851271,-0.1462641971\N,0.9101664431,-0.4528941879,-0.108661213\C,0.904  
3833949,4.3618540908,0.2531981906\C,0.2260019902,3.1554207603,0.100904  
766\C,0.9211830924,1.9698324461,-0.0854876642\C,2.3137672187,1.9792373  
209,-0.1226739768\C,3.0051739175,3.1743561096,0.0399000075\C,2.2946877  
639,4.3630937166,0.2255934458\C,-1.1463282945,0.7419693916,-0.11798567  
59\C,-1.8169588275,1.9723976292,0.054109364\C,-3.1991485768,2.02201533  
82,0.1645826402\C,-3.9532314054,0.8533783694,0.1118389867\C,-3.2833158  
233,-0.3516443096,-0.0480379303\C,-1.8967405005,-0.4287715685,-0.16305  
92008\C,2.940814255,-1.6937140183,-0.0117522214\C,2.3450248407,-2.7941  
725725,0.6217908133\C,3.0388366347,-3.9901162881,0.7507314049\C,4.3377  
289312,-4.1094132063,0.2528448648\C,4.9349663722,-3.0244617999,-0.3829  
674538\C,4.2427430021,-1.8230708325,-0.5158898229\O,-1.1513068126,3.17  
37595108,0.1232455172\H,-3.6682131693,2.9895272856,0.2987230086\H,-1.4  
100563809,-1.3839185815,-0.2853821487\H,1.340044484,-2.6904193718,1.01  
20923468\H,2.5672031112,-4.8319119901,1.2468412392\H,5.9386510999,-3.1  
121640021,-0.7856581951\H,4.7045126168,-1.001317841,-1.0531457203\H,2.  
8331832679,5.2965346686,0.3418744953\H,0.3320039503,5.2717386365,0.386  
7182326\H,-5.0304575374,0.8642184653,0.1959928213\H,4.8783184185,-5.04  
41361445,0.3586932701\H,4.0898073691,3.1768089266,0.0104233509\N,-4.05  
94618363,-1.5939164712,-0.0972694671\O,-3.4453379958,-2.6478720873,-0.  
2270085933\O,-5.2802715161,-1.5084424191,-0.0049272385\H,3.9000268209,  
0.682848847,0.0005219736\\Version=ES64L-G09RevD.01\State=1-A\HF=-1175.  
8545581\RMSD=3.831e-09\RMSF=1.545e-06\Dipole=2.6648671,1.3140726,0.343  
4036\Quadrupole=-0.9097982,4.4973376,-3.5875394,-13.0414928,-1.1025844

,-0.9778252\PG=C01 [X(C19H12N4O3)]\\  
No imaginary frequencies.

**1e-leuco (X=CF<sub>3</sub>)**

1\1\GINC-LOCALHOST\FOpt\RB3LYP\6-31G(2d,p)\C20H12F3N3O1\PIOTR\14-Feb-2  
020\0\#P B3LYP/6-31G(2d,p) FOpt=tight freq(noraman) SCF=Direct #P Geo  
m=(NoDistance,NoAngle) fcheck\Parent flat C(8)-O-Ph(N1)-CF<sub>3</sub> benzotraz  
inyl leuco, C1\0,1\N,-0.1470126049,-0.7621206254,-0.3222368077\N,-2.8  
478551662,-1.0114641851,-0.3600014225\C,-2.2024919312,0.2220509054,-0.  
1688369228\N,-0.923577615,0.3698912548,-0.1558794148\C,-0.4582771846,-  
4.4089935832,0.2863495713\C,0.1038314603,-3.1491533073,0.0920267424\C,  
-0.7043787032,-2.0391360364,-0.1101808628\C,-2.0901291005,-2.180620718  
1,-0.1196583755\C,-2.6646765135,-3.429777672,0.0853293335\C,-1.8423228  
066,-4.541515893,0.2852687901\C,1.2377417167,-0.6225674583,-0.19495889  
28\C,2.0219939911,-1.7770813717,-0.0047126796\C,3.3994123485,-1.686918  
7609,0.1056100591\C,4.032484832,-0.4472686681,0.0275845737\C,3.2638758  
032,0.696515057,-0.157003459\C,1.8742559469,0.6145090052,-0.2634087769  
\C,-3.0602028517,1.4130451396,-0.0146424236\C,-2.5600705072,2.56297906  
84,0.6138745054\C,-3.3623749544,3.6862937483,0.764648322\C,-4.67682945  
39,3.6831839919,0.2938284811\C,-5.180015102,2.5489103636,-0.3371452944  
\C,-4.3785831167,1.4200949014,-0.4919642723\O,1.473933174,-3.041142595  
2,0.0872068841\H,3.9622884107,-2.5997303655,0.2624147478\H,1.272696639  
6,1.5030420849,-0.3923517433\H,-1.5424416783,2.552894628,0.9846500665\  
H,-2.9638504196,4.5668625152,1.2577661002\H,-6.1956493993,2.5415755423  
, -0.7189109902\H,-4.7703616342,0.5601565968,-1.0250440847\H,-2.2883542  
195,-5.5182701743,0.4337899064\H,0.1990749945,-5.2578253893,0.43074600  
43\H,5.108608442,-0.3754458852,0.1181398267\H,-5.3022992839,4.56107931  
81,0.4174167684\H,-3.7447398676,-3.5337004057,0.0773827047\C,3.9276344  
113,2.0372722864,-0.2951417567\F,5.128934164,2.0690777435,0.3119520317  
\F,4.1384433084,2.3656250926,-1.5881618685\F,3.1804439852,3.0260832002  
,0.2332081482\H,-3.7896687644,-1.041140559,0.0061482704\Version=ES64L  
-G09RevD.01\State=1-A\HF=-1308.3879449\RMSD=9.273e-09\RMSF=1.002e-06\D  
ipole=-1.9310798,-0.8247491,0.4135255\Quadrupole=6.1989651,2.2011622,-  
8.4001273,-6.4984726,0.9657565,0.7515721\PG=C01 [X(C20H12F3N3O1)]\\  
No imaginary frequencies.

**1f-leuco (X=OMe)**

1\1\GINC-LOCALHOST\FOpt\RB3LYP\6-31G(2d,p)\C20H15N3O2\PIOTR\05-May-202  
1\0\#P B3LYP/6-31G(2d,p) FOpt=tight freq(noraman) SCF=Direct #P Geom=  
(NoDistance,NoAngle) fcheck\Parent C(8)-O-Ph(N1)-10-)-10-OMe 2nd orin  
t benzotrazinyl (phenazinoBT) Leuco\0,1\N,0.3072215837,0.4277042283,0  
.3013737457\N,-2.2105811428,1.4325770503,0.4035332576\C,-1.9440776703,  
0.0698914473,0.1759264613\N,-0.7586650237,-0.4317675881,0.1329498462\C  
,1.0250086545,4.0208859962,-0.3030279882\C,1.2185334443,2.6511881681,-  
0.1222942136\C,0.1320711163,1.8138175718,0.1014637189\C,-1.1564869514,  
2.341337942,0.1443651974\C,-1.3622359795,3.7023967511,-0.0476570519\C,  
-0.2643062587,4.5382718581,-0.2681876326\C,1.5990493619,-0.0941335962,  
0.1520693295\C,2.6659805214,0.7904291551,-0.0551983645\C,3.9589525705,  
0.3051045959,-0.1747148608\C,4.2155172013,-1.0587140584,-0.0927060086\  
C,3.1557647432,-1.9464185282,0.1085692338\C,1.8493979043,-1.4670410073  
,0.2302353145\C,-3.1048149848,-0.827395925,0.0242147295\C,-2.959717022  
3,-2.0627925949,-0.6250519991\C,-4.0480342972,-2.9121199207,-0.7732805  
352\C,-5.3020493128,-2.5459265402,-0.2799092037\C,-5.455417143,-1.3248  
301271,0.3705083116\C,-4.3658480596,-0.4700919428,0.5230557431\O,2.497  
4577994,2.1676697025,-0.1528827307\H,-2.3690559733,4.1057423675,-0.013  
3391363\H,4.7611323822,1.0158042083,-0.339000759\H,1.0068100833,-2.123  
4879603,0.3844184748\H,-1.9857452052,-2.3326702914,-1.0146971973\H,-3.

921578757,-3.8615584226,-1.2835257048\H,-6.4225683208,-1.0363307647,0.7691070328\H,-4.4918984116,0.4578643648,1.0708294072\H,-0.4200316876,5.6022845892,-0.4062998763\H,1.8912467883,4.6512736832,-0.4640726766\H,5.221675417,-1.4489162312,-0.1833117122\H,-6.151628638,-3.2096305814,-0.4022349763\O,3.4903140536,-3.2672024042,0.1748301798\C,2.4544149098,-4.2075097151,0.3849591993\H,1.7172692411,-4.1871966632,-0.4279445064\H,2.9353952199,-5.1867131688,0.4083441041\H,1.9381685154,-4.0361265554,1.3381230558\H,-3.1090247818,1.7336682574,0.0502280611\\Version=ES64L-G09RevD.01\State=1-A\HF=-1085.8691812\RMSD=2.338e-09\RMSF=1.102e-06\Dipole=-1.4419098,-0.0403254,-0.1966803\Quadrupole=2.5626632,6.7739385,-9.3366017,-0.1461916,-0.2655979,-0.1238628\PG=C01 [X(C20H15N3O2)]\

No imaginary frequencies.

### 1g-leuco (X=F)

1\1\GINC-LOCALHOST\FOpt\RB3LYP\6-31G(2d,p)\C19H12F1N3O1\PIOTR\07-Feb-2020\0\#P B3LYP/6-31G(2d,p) FOpt=tight freq(noraman) SCF=Direct #P Geom=(NoDistance,NoAngle) fcheck\\Parent C(8)-O-Ph(N1)-10-Cl benzotraziny1 (phenazinoBT) Leuco\\0,1\N,0.0073638744,0.6083329132,0.3158769204\N,-1.8486057973,-1.3651318849,0.4713106896\C,-0.4881034877,-1.6185392406,0.2261704155\N,0.4138061277,-0.7017342776,0.1590180266\C,-3.0850153725,2.5997546273,-0.1762543453\C,-1.7363684375,2.2730636973,-0.0397133346\C,-1.3512272541,0.9539764996,0.1627333673\C,-2.3136866401,-0.0507359554,0.2319920636\C,-3.6602298702,0.2611414148,0.0849738328\C,-4.0392883442,1.5908438705,-0.1168309111\C,0.9626457784,1.6125990972,0.1474576332\C,0.5289253633,2.9387869602,-0.0386027057\C,1.4445894769,3.9664096455,-0.180415709\C,2.8169873743,3.709130124,-0.1436200745\C,3.2271180313,2.3991579069,0.0335405508\C,2.3317743438,1.3477792422,0.1788373966\C,-0.0816664351,-3.0295533224,0.0819139073\C,1.1055005022,-3.35400715,-0.5913372549\C,1.4944919234,-4.6795723837,-0.7315356932\C,0.7069307479,-5.7055973193,-0.2054522864\C,-0.4700327765,-5.3934210481,0.469187923\C,-0.863872352,-4.0649566769,0.6133645754\O,-0.8143144505,3.2849533942,-0.0925282671\H,-4.4049552807,-0.5261223485,0.1395364143\H,1.0679206081,4.9722024481,-0.3265888254\H,2.6850566571,0.3358321141,0.3149937512\H,1.7046104748,-2.5516886799,-1.0042890365\H,2.4126094619,-4.9155972354,-1.2596186227\H,-1.0820019774,-6.182803528,0.8931961473\H,-1.7606124666,-3.8353281447,1.1792678591\H,-5.0895628878,1.8386378526,-0.220808369\H,-3.3572456747,3.638003151,-0.3229995702\H,3.547086304,4.5008825857,-0.251891561\H,1.0114099004,-6.7406243168,-0.3205713624\F,4.5418092651,2.1216775013,0.0692003071\H,-2.46582672,-2.0927896833,0.1370649256\\Version=ES64L-G09RevD.01\State=1-A\HF=-1070.576054\RMSD=4.653e-09\RMSF=8.146e-07\Dipole=-1.2267874,-0.9903159,-0.264507\Quadrupole=-1.0530803,8.9475382,-7.8944579,0.2546711,-1.4473683,-0.524228\PG=C01 [X(C19H12F1N3O1)]\

No imaginary frequencies.

### 1h-leuco (X=Cl)

1\1\GINC-LOCALHOST\FOpt\RB3LYP\6-31G(2d,p)\C19H12Cl1N3O1\PIOTR\07-Feb-2020\0\#P B3LYP/6-31G(2d,p) FOpt=tight freq(noraman) SCF=Direct #P Geom=(NoDistance,NoAngle) fcheck\\Parent C(8)-O-Ph(N1)-10-Cl benzotraziny1 (phenazinoBT) Leuco\\0,1\N,-0.2324809419,-0.3394444773,-0.7201821031\N,1.6015715396,-0.4712006933,1.2745196647\C,0.2371436029,-0.2340152161,1.5124398714\N,-0.6548463207,-0.1764564544,0.5856286909\C,2.8773349066,0.1838546887,-2.6768069894\C,1.5275264912,0.0337238594,-2.3639128419\C,1.1283636283,-0.1719803524,-1.0500502109\C,2.0798948246,-0.2298504312,-0.0342203431\C,3.4282808022,-0.0692762568,-0.3315118396\C,3.8207389058,0.1349505348,-1.6568529155\C,-1.177087755,-0.1648898047,-1.7346896182\C,-0.7288793338,0.0253014481,-3.0551837764\C,-1.6339144098,0.17

44463287,-4.0913903829\C,-3.0081995952,0.1406956078,-3.8479817067\C,-3.4411133427,-0.0409279064,-2.5425586512\C,-2.5495156494,-0.1930400542,-1.4844981247\C,-0.1851981457,-0.0856411761,2.9185519041\C,-1.3817071413,0.5784157739,3.227227278\C,-1.7848871794,0.7220856641,4.5481851628\C,-1.0026691529,0.2090749444,5.5847653904\C,0.1833939656,-0.4566647818,5.2881553643\C,0.591277807,-0.6045884033,3.9644260533\O,0.6142763471,0.0750385653,-3.3871806468\H,4.1646346149,-0.1147283164,0.4641692989\H,-1.2480307492,0.324096805,-5.0932379547\H,-2.8988334388,-0.3321342988,-0.4720109996\H,-1.9770218375,0.9816931468,2.4172043156\H,-2.7101765536,1.2427708271,4.7722190702\H,0.7912663537,-0.8709335558,6.0857865003\H,1.4948358958,-1.1644820075,3.7470830525\H,4.8726954893,0.2489847341,-1.8925685403\H,3.1595308295,0.332232545,-3.7121105696\H,-3.7182614406,0.2559067952,-4.6562580093\H,-1.318545877,0.3272308694,6.6160130096\C1,-5.1666410095,-0.0821711022,-2.2035884647\H,2.2088573095,-0.1347682492,2.0094015616\\Version=ES64L-G09RevD.01\State=1-A\HF=-1430.9377286\RMSD=4.577e-09\RMSF=1.627e-06\Dipole=1.5162444,0.2840572,1.0329265\Quadrupole=-1.8032123,-8.2057642,10.0089764,-1.2602055,-0.2875415,-0.5572144\PG=C01 [X(C19H12Cl1N3O1)]\\

No imaginary frequencies.

### 1i-leuco (X=Br)

1\1\GINC-LOCALHOST\FOpt\RB3LYP\Gen\C19H12Br1N3O1\PIOTR\13-Feb-2020\0\\#P B3LYP/gen FOpt=tight freq(noraman) SCF=Direct #P Geom=(NoDistance,NoAngle) fcheck Pseudo=Read\\Parent C(8)-O-Ph(N1)-10-Br benzotrazinyl (phenazinoBT) Leuco\\0,1\N,-0.4258326291,0.3950283836,-0.2878367303\N,2.0350104758,1.5360325796,-0.3766455675\C,1.8432548037,0.1595520373,-0.1695877116\N,0.6875460414,-0.408085951,-0.1329669091\C,-1.3485316874,3.9461529696,0.2806767801\C,-1.459938484,2.5664716675,0.1073918998\C,-0.3270620287,1.7888841391,-0.098978709\C,0.9319285068,2.3866271718,-0.1339336005\C,1.0575063838,3.7600458619,0.0495545219\C,-0.0883189315,4.5347694465,0.2541357673\C,-1.6817241443,-0.1975999708,-0.140085344\C,-2.8055485445,0.6293822778,0.0509306327\C,-4.0712431916,0.0803161237,0.1732511706\C,-4.2582612077,-1.3032456408,0.1118039743\C,-3.143718908,-2.1109985281,-0.0698343879\C,-1.8614232224,-1.581983822,-0.1958665051\C,3.0525861342,-0.6760491678,-0.0275581444\C,2.9731924148,-1.9250112204,0.6082880624\C,4.1069609798,-2.7160205965,0.7479206036\C,5.3396504453,-2.2761350044,0.2587669848\C,5.4272256399,-1.0408803117,-0.3792296241\C,4.292243806,-0.2444670137,-0.523251512\O,-2.7122630723,2.0070536973,0.1276740596\H,2.0405366953,4.219995065,0.02190721\H,-4.9105172192,0.7504852535,0.3240060227\H,-0.9975257195,-2.2155321774,-0.3358813861\H,2.0148631232,-2.2532445394,0.9932324631\H,4.0317904218,-3.6773145451,1.2468099521\H,6.3776657081,-0.6966232512,-0.7750568719\H,4.3676073458,0.6953026562,-1.0613230867\H,0.0064872928,5.6070809832,0.3866532989\H,-2.2505761705,4.5283971939,0.4292042557\H,-5.2485861266,-1.7298047986,0.2063619253\H,6.2242756655,-2.8947418,0.3735145106\H,2.91723395,1.8842953833,-0.0274068518\Br,-3.3648525967,-4.0246210218,-0.1518009336\\Version=ES64L-G09RevD.01\State=1-A\HF=-983.8898511\RMSD=3.607e-09\RMSF=8.899e-07\Dipole=1.4824514,1.1880863,0.3209342\Quadrupole=9.2589984,0.2682671,-9.5272655,-2.1080097,-0.5576112,-0.6330079\PG=C01 [X(C19H12Br1N3O1)]\\

No imaginary frequencies.

### 1j-leuco (X=COMe)

1\1\GINC-LOCALHOST\FOpt\RB3LYP\6-31G(2d,p)\C21H15N3O2\PIOTR\05-May-2021\0\\#P B3LYP/6-31G(2d,p) FOpt=tight freq(noraman) SCF=Direct #P Geom=(NoDistance,NoAngle) fcheck\\Parent flat C(8)-O-Ph(N1)-10-Ac benzotrazinyl-H, 2nd orient leuco C1\\0,1\N,-0.1575630648,0.6011764923,0.298622

3979\N,2.4652017691,1.271367821,0.4126788682\C,2.0289194731,-0.0436562  
235,0.1718619509\N,0.7899190966,-0.3900118729,0.1203564123\C,-0.411702  
6277,4.2565067827,-0.2874946495\C,-0.7723274108,2.921455106,-0.1176283  
716\C,0.1948062786,1.951422048,0.1055850346\C,1.5398838504,2.310380721  
4,0.1564621602\C,1.9152156436,3.6362029498,-0.0257900964\C,0.933163118  
7,4.6062337263,-0.2437167268\C,-1.504500451,0.2475687734,0.1404238414\  
C,-2.4529153067,1.2655059309,-0.0687823389\C,-3.8016447041,0.961898907  
9,-0.196999007\C,-4.2300878502,-0.3572108642,-0.1229260395\C,-3.304296  
6315,-1.3854845795,0.0779695629\C,-1.9439632471,-1.07205237,0.20822873  
66\C,3.067630519,-1.0795493868,0.0130423925\C,2.7746001417,-2.27162042  
52,-0.6657066445\C,3.7468639605,-3.2513005396,-0.818072605\C,5.0287116  
909,-3.060204751,-0.2985976339\C,5.3276934794,-1.8828591797,0.38136386  
82\C,4.3553029678,-0.8975567255,0.53736115\O,-2.1077890676,2.597593791  
4,-0.1580113957\H,-4.4961891487,1.7781134678,-0.3608778063\H,-1.198878  
9427,-1.8396782838,0.3628442012\H,1.780428415,-2.4063801116,-1.0739996  
768\H,3.5075124384,-4.1657908739,-1.3509483582\H,6.3169919571,-1.73043  
40374,0.8001676366\H,4.590793837,-0.0047123684,1.1070608284\H,1.223155  
4942,5.642655291,-0.3732330236\H,-1.1908292871,4.9919704139,-0.4472949  
401\H,-5.2774896874,-0.6142302719,-0.2204416175\H,5.7874313986,-3.8256  
941665,-0.4232554681\H,2.9645860884,3.9096101096,0.013940938\C,-3.8108  
263991,-2.789647387,0.1473722193\O,-4.9987667545,-3.0293633509,0.03211  
7002\C,-2.8150687056,-3.9164508975,0.3650968101\H,-2.0674026937,-3.939  
0787372,-0.4348910196\H,-2.275450002,-3.7856018167,1.3091942633\H,-3.3  
574571604,-4.8618050685,0.3839323903\H,3.4008772249,1.4569365256,0.077  
4249146\\Version=ES64L-G09RevD.01\State=1-A\HF=-1123.9974364\RMSD=2.93  
5e-09\RMSF=6.932e-07\Dipole=2.4469887,0.7225207,-0.1950154\Quadrupole=  
-3.0453229,6.9139044,-3.8685815,-8.6660597,0.1744619,0.0459584\PG=C01  
[X(C21H15N3O2)]\\  
No imaginary frequencies.

### 11-leuco (X=NH<sub>2</sub>)

1\1\GINC-LOCALHOST\FOpt\RB3LYP\6-31G(2d,p)\C19H14N4O1\PIOTR\23-Aug-201  
9\0\#P B3LYP/6-31G(2d,p) FOpt=tight freq(noraman) SCF=Direct #P Geom=  
(NoDistance,NoAngle) fcheck\\Parent flat C(8)-O-Ph(N1)-NH2 benzotrazin  
yl 4H, C1\\0,1\N,0.2358419812,0.7390880434,-0.2556608378\N,2.946429161  
2,0.7383962307,-0.4092859893\C,2.1966040168,-0.4256073784,-0.157868587  
5\N,0.9107453799,-0.4517723101,-0.0927815185\C,0.9093749059,4.35318506  
26,0.2636509925\C,0.2189859618,3.1491426652,0.1188250813\C,0.915119088  
1,1.9645635722,-0.0930134097\C,2.3067836203,1.977070391,-0.1610447653\  
C,3.0046584496,3.1686713163,-0.0048434754\C,2.297565364,4.3558460833,0  
.2048981242\C,-1.1549829155,0.7328295773,-0.0933595798\C,-1.8167065324  
,1.9567401207,0.1017482888\C,-3.1931447604,1.9848637674,0.2325223074\C  
,-3.9397181251,0.809203582,0.1741074108\C,-3.2951048339,-0.4175190576,  
-0.0133114857\C,-1.9000527433,-0.4426609396,-0.1467304169\C,2.94342426  
56,-1.6885825271,-0.0075729101\C,2.3615310722,-2.7746849432,0.66373905  
72\C,3.0584020713,-3.9666015844,0.8105003455\C,4.3489901758,-4.0984273  
569,0.2935174009\C,4.9331356348,-3.0285704497,-0.3786512951\C,4.237298  
7201,-1.8310162751,-0.5295820843\O,-1.146137854,3.174514234,0.17405436  
16\H,-3.6748999331,2.9444719047,0.3841301035\H,-1.3746988207,-1.378575  
1693,-0.2885174724\H,1.3644647007,-2.6587318626,1.0708214163\H,2.59728  
38328,-4.7955193042,1.3377935936\H,5.9304978329,-3.1248112747,-0.79530  
06085\H,4.6891622623,-1.0215928518,-1.0932510659\H,2.8380912175,5.2891  
564037,0.3157453108\H,0.3407998913,5.2625500606,0.4171532427\H,-5.0188  
957883,0.8474936335,0.280797375\H,4.8929366298,-5.0294575823,0.4144583  
972\H,4.088455167,3.1697210681,-0.0588308773\N,-4.0196466649,-1.619525  
8842,-0.0062380008\H,3.8960676582,0.6896258953,-0.0649883212\H,-3.5744  
77442,-2.3606170671,-0.5316452351\H,-4.9795764774,-1.5105590736,-0.306  
2240627\\Version=ES64L-G09RevD.01\State=1-A\HF=-1026.7000702\RMSD=4.51



6e-09\RMSF=7.009e-07\Dipole=0.7137666,-0.5224288,-0.1773772\Quadrupole  
=10.158486,1.6047048,-11.7631908,2.3917306,3.0949437,1.6471008\PG=C01  
[X(C19H14N4O1)]\\  
No imaginary frequencies.

### 1m-leuco (X=NHAc)

1\1\GINC-LOCALHOST\FOpt\RB3LYP\6-31G(2d,p)\C21H16N4O2\PIOTR\07-May-202  
1\0\#\#P B3LYP/6-31G(2d,p) FOpt=tight freq(noraman) SCF=Direct #P Geom=  
(NoDistance,NoAngle) fcheck\Parent flat C(8)-O-Ph(N1)-NHAc 2nd benzot  
razinyl-H, leuco C1\0,1\N,-0.1156168843,0.8929375091,-0.2732281545\N,  
-2.8112680489,0.6495960079,-0.4322013213\C,-1.9645614879,-0.4416142185  
, -0.167819861\N,-0.6815605213,-0.354069096,-0.0971006867\C,-1.10834244  
28,4.4313480958,0.2532019033\C,-0.3147275905,3.2934207621,0.109130487  
C,-0.9013161687,2.0527579239,-0.1084086103\C,-2.28794316,1.9411003719,  
-0.1816227873\C,-3.0893225548,3.0657312595,-0.0260693409\C,-2.49125613  
45,4.3106010874,0.1882709267\C,1.2680178788,1.0125232037,-0.0947614597  
\C,1.8196877047,2.289101595,0.1062507878\C,3.1865246633,2.4377778481,0  
.2541494391\C,4.0464093539,1.3399173151,0.2098964337\C,3.5039002871,0.  
0674266782,0.0164532081\C,2.1184270919,-0.0872248627,-0.1339463151\C,-  
2.5994472916,-1.7636823029,-0.0080190939\C,-1.9346060821,-2.7842861148  
,0.6880546164\C,-2.526043001,-4.0308537014,0.8438354718\C,-3.791759524  
5,-4.2830528131,0.3107266344\C,-4.4575657791,-3.278570085,-0.386090389  
3\C,-3.8675518669,-2.0266929352,-0.5458356771\O,1.0450738536,3.4389766  
729,0.168902171\H,3.5779294408,3.4365251973,0.4123591555\H,1.678708616  
3,-1.0660719983,-0.2825088887\H,-0.9583687383,-2.5747797132,1.10803875  
7\H,-2.0025560546,-4.8083043523,1.390888118\H,-5.4360563384,-3.4683783  
071,-0.8150224727\H,-4.380231988,-1.2680839908,-1.1278824152\H,-3.1129  
683784,5.1919395364,0.2980585356\H,-0.623337186,5.3872486429,0.4102601  
68\H,5.1119783682,1.4595543735,0.3234838371\H,-4.2536200165,-5.2564959  
691,0.4384820396\H,-4.168781272,2.9710935762,-0.0835427502\N,4.2810671  
247,-1.1078737542,-0.044144874\H,3.7548211216,-1.954815173,-0.19413284  
84\C,5.6415506161,-1.2568289791,0.0920723224\O,6.4147469098,-0.3344681  
209,0.2751833026\C,6.1125412647,-2.702852443,0.0235378587\H,6.09648075  
04,-3.141139826,1.0274440745\H,5.495053691,-3.3253139287,-0.6308741101  
\H,7.1430192293,-2.7116013319,-0.3324255849\H,-3.7580564854,0.51731809  
01,-0.1025928271\Version=ES64L-G09RevD.01\State=1-A\HF=-1179.3690777\  
RMSD=1.952e-09\RMSF=9.368e-07\Dipole=-1.9845237,-1.2259717,0.0865709\Q  
uadrupole=-3.9068964,11.1421413,-7.235245,-7.5160972,-0.856773,-0.1241  
723\PG=C01 [X(C21H16N4O2)]\@

No imaginary frequencies.

### 1n-leuco (X=I)

1\1\GINC-LOCALHOST\FOpt\RB3LYP\Gen\C19H12I1N3O1\PIOTR\11-Feb-2020\0\#\#  
P B3LYP/gen FOpt=tight freq(noraman) SCF=Direct #P Geom=(NoDistance,No  
Angle) fcheck Pseudo=Read\Parent C(8)-O-Ph(N1)-10-I benzotrazinyl (ph  
enazinoBT) Leuco\0,1\N,-0.4263884612,0.3916557444,-0.2796180577\N,2.0  
331826912,1.5318348126,-0.3827289163\C,1.8425443588,0.1563098643,-0.16  
7000776\N,0.6869758331,-0.4112879179,-0.1235249879\C,-1.3460313494,3.9  
441581953,0.2867961396\C,-1.4582670077,2.5641262465,0.1173017501\C,-0.  
326947301,1.7857534935,-0.0938506947\C,0.9317586096,2.3835192601,-0.13  
67738079\C,1.0585973299,3.7572654417,0.043358781\C,-0.0859701121,4.532  
6910987,0.2522110264\C,-1.683630227,-0.2000301751,-0.1363671321\C,-2.8  
05413749,0.628372088,0.0595915716\C,-4.0723050181,0.0816107581,0.17665  
14698\C,-4.2623434381,-1.3008278976,0.1042374745\C,-3.1513474076,-2.11  
49627962,-0.0834495469\C,-1.8671770017,-1.5840614357,-0.2032699385\C,3  
.0533270664,-0.6768907829,-0.0242592525\C,2.979618843,-1.9210930276,0.  
6214470787\C,4.1157407302,-2.7089864613,0.7608554335\C,5.3449421535,-2

.2705977237,0.2617719742\C,5.4267856048,-1.040062686,-0.3860161655\C,4.2896253762,-0.2467609696,-0.529641053\O,-2.7104373369,2.0047066483,0.1471057936\H,2.0416044248,4.2168619804,0.0097392297\H,-4.9102128127,0.7526522518,0.3318725339\H,-1.0001430823,-2.2130566085,-0.3469229138\H,2.0238914931,-2.2480809655,1.0139494172\H,4.0450568184,-3.6665400072,1.2675313991\H,6.3744638333,-0.6970030574,-0.7894324679\H,4.3607114367,0.6890545133,-1.0751310494\H,0.009594892,5.6053002354,0.3816722862\H,-2.247337586,4.5266729844,0.4387322695\H,-5.2567313183,-1.7184225364,0.1960387479\H,6.2313552789,-2.8866178447,0.3766695749\H,2.9170720215,1.8817038451,-0.03928481\I,-3.4076350965,-4.2138729082,-0.1934106012\Version=ES64L-G09RevD.01\State=1-A\HF=-982.1033435\RMSD=4.916e-09\RMSF=2.149e-06\Dipole=1.4797592,1.1418725,0.3154124\Quadrupole=9.3485127,1.6085691,-10.9570818,-0.1412885,-0.3737848,-0.3799882\PG=C01 [X(C19H12I1N3O1)]\

No imaginary frequencies.

### 1o-leuco (X=OH)

1\1\GINC-LOCALHOST\FOpt\RB3LYP\6-31G(2d,p)\C19H13N3O2\PIOTR\06-May-2021\0\#P B3LYP/6-31G(2d,p) FOpt=tight freq(noraman) SCF=Direct #P Geom=(NoDistance,NoAngle) fcheck\Parent C(8)-O-Ph(N1)-10-OH 2nd orient benzotrazinyl leuco\0,1\N,-0.6063827115,0.0822259378,-0.2963519076\N,1.6072353882,1.6477021358,-0.3882327605\C,1.666001892,0.2590991888,-0.1736342084\N,0.6309934358,-0.5066635767,-0.1367988791\C,-2.147507862,3.4055742021,0.3051455845\C,-2.0145203375,2.0288322476,0.122603543\C,-0.7607103711,1.4701400268,-0.0951386337\C,0.3689087667,2.2844318625,-0.1321387397\C,0.2495174285,3.6554518171,0.0615361913\C,-1.0148870039,4.2102583401,0.2772863769\C,-1.7388056826,-0.7276133709,-0.1614110825\C,-2.9881177771,-0.119089175,0.0407329903\C,-4.1311184348,-0.8928685387,0.1473286464\C,-4.0654278395,-2.282133203,0.0581300541\C,-2.8271445372,-2.889463082,-0.136503246\C,-1.668212715,-2.1181693068,-0.2451959127\C,3.0045305508,-0.3437347781,-0.028972573\C,3.1547644967,-1.576958495,0.622819064\C,4.4115645671,-2.1503865052,0.7631914657\C,5.542354906,-1.5047289227,0.2588066509\C,5.4032811301,-0.2830706188,-0.3938705395\C,4.1442072016,0.2955790155,-0.5380056867\O,-3.1446192074,1.2592596038,0.1464460715\H,1.1339242606,4.2834624568,0.0318618085\H,-5.0775806396,-0.388848917,0.3078378907\H,-0.6986331948,-2.5780829226,-0.3949579283\H,2.2729345554,-2.0641081045,1.0207630741\H,4.5126881334,-3.1016751618,1.2755841627\H,6.2741190394,0.2206219474,-0.8005878756\H,4.0468832101,1.2266074439,-1.0864518782\H,-1.1133951963,5.2808371646,0.4172483924\H,-3.1378144513,3.8157930014,0.4623516398\H,-4.955363035,-2.8937279417,0.1389224555\H,6.5236707046,-1.9529443211,0.374410758\O,-2.7951172504,-4.2531814452,-0.2165619409\H,-1.8843745665,-4.5340556746,-0.3577452431\H,2.4103637565,2.1475014992,-0.0308411849\Version=ES64L-G09RevD.01\State=1-A\HF=-1046.5653141\RMSD=3.533e-09\RMSF=1.023e-06\Dipole=1.502717,0.49029,0.2056594\Quadrupole=3.5831837,4.7226814,-8.3058651,-2.8227687,-0.4751933,-0.1365053\PG=C01 [X(C19H13N3O2)]\@

No imaginary frequencies.

### 1p-leuco (X=OBn)

1\1\GINC-LOCALHOST\FOpt\RB3LYP\6-31G(2d,p)\C26H19N3O2\PIOTR\08-May-2021\0\#P B3LYP/6-31G(2d,p) FOpt=tight freq(noraman) SCF=Direct #P Geom=(NoDistance,NoAngle) fcheck\Parent C(8)-O-Ph(N1)-10-OBn 2nd orient benzotrazinyl leuco, C1\0,1\N,-1.6848221201,-0.6839098644,0.2747081037\N,-4.1551787527,0.4167731731,0.45934388\C,-3.0077156174,1.1720528701,1.553219661\N,-1.8229981178,0.6740312576,0.0716561465\C,-3.7730987143,-3.7220353943,-0.1675915256\C,-2.6523744796,-2.8990865328,-0.0558011449\C,-2.8048416739,-1.5322029721,0.143801707\C,-4.0800349908,-0.9782602

241,0.2301439923\C,-5.2038215734,-1.7866874429,0.1063893521\C,-5.04217  
24198,-3.1608528857,-0.0894089151\C,-0.4153272907,-1.2472517993,0.0945  
602314\C,-0.3088609979,-2.6328217184,-0.0857525937\C,0.9377421715,-3.2  
211348946,-0.2319582648\C,2.0942745488,-2.4499249861,-0.2049144903\C,1  
.9946477137,-1.0676085878,-0.0311165166\C,0.7432589516,-0.4653909336,0  
.1190257314\C,-3.1867884889,2.6241401683,-0.0320594094\C,-2.2429418908  
,3.3620801665,-0.7621220784\C,-2.406277607,4.7289421564,-0.9442069176\  
C,-3.5138445801,5.3859070786,-0.4041622863\C,-4.4529553799,4.663715346  
5,0.326753925\C,-4.2927044957,3.2924051392,0.5128993908\O,-1.4140112,-  
3.4757555314,-0.1293702982\H,-6.1941139688,-1.3482158291,0.1738795511\  
H,0.9856990083,-4.2949563724,-0.3738743214\H,0.627039836,0.5984603506,  
0.2580199377\H,-1.3931411614,2.8416488244,-1.1867673737\H,-1.671110531  
6,5.2849441923,-1.5170230669\H,-5.3103112513,5.166785537,0.7619107895\  
H,-5.0102900258,2.7518848208,1.1211452332\H,-5.9163639092,-3.796477632  
, -0.1743585073\H,-3.6249769762,-4.7856301971,-0.3108777301\H,3.0730195  
691,-2.8998595568,-0.3163767677\H,-3.6412064369,6.4531254048,-0.552679  
1054\O,3.1761263252,-0.3839728937,-0.0132813654\C,3.1385031982,1.02923  
80354,0.1191174398\H,2.6742037512,1.3117160232,1.0739699987\H,2.519048  
8582,1.456270217,-0.6846097409\C,4.5448315448,1.5713139617,0.041984025  
6\C,5.5180837491,0.9497829597,-0.7442827301\C,4.8737468361,2.740758676  
4,0.730999046\C,6.7975199765,1.4921346071,-0.8388980452\C,6.150635874  
3,3.2888215985,0.6298605268\C,7.1172474411,2.6644672891,-0.1557672364\  
H,5.2688808813,0.0344309667,-1.2680482981\H,4.1267156987,3.224616637,1  
.3545136282\H,7.5469010277,0.9967572852,-1.4482660314\H,6.3917482052,4  
.1971644315,1.1728048151\H,8.1146970627,3.0854174562,-0.2306634498\H,-  
5.0153152072,0.8407151579,0.1382069143\\Version=ES64L-G09RevD.01\State  
=1-A\HF=-1316.9308291\RMSD=9.741e-09\RMSF=8.295e-07\Dipole=-1.0469766,  
0.9725443,-0.2275291\Quadrupole=10.1234544,1.7219076,-11.845362,-0.031  
0142,-1.8311539,2.005953\PG=C01 [X(C26H19N3O2)]\

No imaginary frequencies.

### 1q-leuco (X=Ph)

1\1\GINC-LOCALHOST\FOpt\RB3LYP\6-31G(2d,p)\C25H17N3O1\PIOTR\09-Feb-202  
0\0\#P B3LYP/6-31G(2d,p) FOpt=tight freq(noraman) SCF=Direct #P Geom=  
(NoDistance,NoAngle) fcheck\\Parent C(8)-O-Ph(N1)-10-Ph benzotrazinyl  
leuco (phenazinoBT), C1\\0,1\N,-0.272352841,-0.9471521701,-0.884110085  
1\N,1.5124062871,-2.0174623028,0.8590822147\C,0.1260586388,-2.23406807  
59,0.9598910446\N,-0.7403713895,-1.7299188034,0.1520689334\C,2.8395566  
383,-0.6357024819,-2.8827504765\C,1.4972167551,-0.5592241048,-2.514138  
4755\C,1.0785718032,-1.0319239194,-1.2770298636\C,2.0044154013,-1.5867  
670238,-0.3958361986\C,3.3432129343,-1.6810447801,-0.7571066719\C,3.75  
54638072,-1.2002262207,-2.0028183239\C,-1.2018940672,-0.4867603461,-1.  
8263669457\C,-0.7304429632,-0.0074673123,-3.0610024664\C,-1.6174687006  
,0.4753727848,-4.0077204314\C,-2.9864908443,0.488355003,-3.748878405\C  
, -3.4829079811,0.0101381407,-2.5314137704\C,-2.5728335855,-0.475777673  
9,-1.5802148264\C,-0.3469139764,-3.0543183102,2.0912979745\C,-1.600485  
4663,-3.6812619085,2.0297753369\C,-2.0528280475,-4.4544796253,3.090637  
7696\C,-1.2639797254,-4.6193930781,4.2309879817\C,-0.0210017818,-3.996  
9249613,4.3039180948\C,0.4365580626,-3.2189926498,3.2425900699\O,0.613  
2915469,0.0086602268,-3.3954640781\H,4.0583327255,-2.1150228813,-0.065  
8491547\H,-1.2168699313,0.842490523,-4.9459948507\H,-2.9215367559,-0.8  
804460285,-0.6400036861\H,-2.2009879399,-3.5558572553,1.1371072782\H,-  
3.0223415769,-4.9376852181,3.0261644329\H,0.5939459493,-4.1077786456,5  
.1910765103\H,1.3876792481,-2.7048092905,3.3325546634\H,4.8012197501,-  
1.2617074919,-2.2818780347\H,3.1370536248,-0.2487686352,-3.8499181745\  
H,-3.6642372559,0.8998936813,-4.4877060316\H,-1.6184274678,-5.22819706  
82,5.0562148112\C,-4.9376686069,0.0177788175,-2.2425736375\C,-5.418750  
685,0.2992057069,-0.9550005391\C,-5.8739870627,-0.2549860209,-3.251277

3169\C,-6.7842632071,0.3075791406,-0.6859998751\C,-7.2397365022,-0.244  
6516436,-2.9837672762\C,-7.7020243703,0.0364607879,-1.6993095377\H,-4.  
7139808698,0.5377880766,-0.1653798771\H,-5.523671165,-0.5029555483,-4.  
2478069565\H,-7.1318313314,0.5354448704,0.3168435828\H,-7.9440668084,-  
0.4662098917,-3.7795653078\H,-8.7667790732,0.0435407033,-1.4899920586\  
H,2.0690825871,-2.7394870757,1.2963674239\\Version=ES64L-G09RevD.01\St  
ate=1-A\HF=-1202.4080488\RMSD=6.274e-09\RMSF=1.702e-06\Dipole=0.685372  
7,-0.8014166,0.7051276\Quadrupole=6.3694194,-8.9334323,2.5640129,-2.38  
53667,2.8898315,-6.3366172\PG=C01 [X(C25H17N3O1)]\\  
No imaginary frequencies.

### 1r-leuco (X=thienyl)

1\1\GINC-LOCALHOST\FOpt\RB3LYP\6-31G(2d,p)\C23H15N3O1S1\PIOTR\13-Feb-2  
020\0\#P B3LYP/6-31G(2d,p) FOpt=tight freq(noraman) SCF=Direct #P Geo  
m=(NoDistance,NoAngle) fcheck\\Parent C(8)-O-Ph(N1)-10-Thio benzotrazi  
nyl Leuco (phenazinoBT), C1\\0,1\N,-0.5730864355,-2.315085979,-2.44725  
94243\N,0.9537744986,-4.517798067,-2.03875457\C,-0.3494010262,-4.39068  
31929,-1.5243782646\N,-1.0976945341,-3.3598306306,-1.712046867\C,2.784  
5319476,-0.9032115268,-3.1596756711\C,1.4042720807,-0.9968944653,-2.98  
81084969\C,0.8219602345,-2.1996509186,-2.6098987259\C,1.6199096174,-3.  
3216677815,-2.3965739994\C,2.9987116048,-3.2376488497,-2.5502954211\C,  
3.5751269685,-2.024374691,-2.9360205314\C,-1.3474416896,-1.1557058116,  
-2.5789832703\C,-0.717198805,0.035519345,-2.982326736\C,-1.4576609698,  
1.191782517,-3.1586768033\C,-2.8316968646,1.1919087187,-2.9321638213\C  
,-3.4826642442,0.0193258383,-2.5300595361\C,-2.7224032811,-1.150615622  
1,-2.3636057044\C,-0.8871986692,-5.5343535022,-0.7631994129\C,-1.94004  
16366,-5.3433073098,0.1440309564\C,-2.4507945318,-6.4149920984,0.86427  
9711\C,-1.9209455295,-7.6958028607,0.6953377873\C,-0.8800395211,-7.896  
6520542,-0.2068629031\C,-0.3649513901,-6.8246565165,-0.9323371227\O,0.  
6434396912,0.1205192224,-3.219782385\H,3.6142898968,-4.1151861101,-2.3  
815052601\H,-0.9369624744,2.0939479078,-3.4591649312\H,-3.196338656,-2  
.0811884234,-2.0839632499\H,-2.3373489691,-4.344168224,0.274984096\H,-  
3.2612531532,-6.2509768152,1.5670588465\H,-0.470344212,-8.8903945844,-  
0.3552970857\H,0.4165685023,-7.0047473508,-1.6630734089\H,4.649108842,  
-1.9594730271,-3.0686213191\H,3.2084508231,0.0451874047,-3.4669707848\  
H,-3.3899275462,2.1143010436,-3.0452133028\H,-2.3192303198,-8.53010422  
65,1.2632724223\C,-4.9264000026,-0.0124571886,-2.2755685528\C,-5.63268  
17902,-0.8362224628,-1.4310731986\C,-7.0344651329,-0.5937591359,-1.432  
7000463\C,-7.3963974476,0.4142508527,-2.2811547951\S,-6.0225025238,1.0  
756772751,-3.0969961774\H,-5.1523630218,-1.5777408365,-0.8048970239\H,  
-7.739851314,-1.14319681,-0.8212965866\H,-8.3818412424,0.8080321841,-2  
.4798698357\H,1.5290840467,-5.1742530564,-1.5283545237\\Version=ES64L-  
G09RevD.01\State=1-A\HF=-1523.1635224\RMSD=8.659e-09\RMSF=1.220e-06\Di  
pole=0.7188296,-1.154,0.6979233\Quadrupole=6.6930246,2.9255512,-9.6185  
759,-3.7697979,-3.6028197,-5.9690165\PG=C01 [X(C23H15N3O1S1)]\\  
No imaginary frequencies.

### 1s-leuco (X=CCPh)

1\1\GINC-LOCALHOST\FOpt\RB3LYP\6-31G(2d,p)\C27H17N3O1\PIOTR\14-Feb-202  
0\0\#P B3LYP/6-31G(2d,p) FOpt=tight freq(noraman) SCF=Direct #P Geom=  
(NoDistance,NoAngle) fcheck\\Parent C(8)-O-Ph(N1)-10-CCPh benzotraziny  
l leuco (phenazinoBT), C1\\0,1\N,0.7305289939,1.6819129669,0.319109693  
\N,-0.7598708781,3.9367209378,0.5145312937\C,-1.318506663,2.682120721,  
0.2094746088\N,-0.6343792989,1.5953824851,0.1196741497\C,3.3843366683,  
4.2381509953,-0.1249707977\C,2.7524111083,3.000704535,-0.0158507725\C,  
1.381253564,2.9249034341,0.1886877005\C,0.6267837498,4.0925654934,0.28  
14271117\C,1.2423179301,5.3328296795,0.1596862819\C,2.6239300977,5.398

7753881,-0.0397861364\C,1.4901672156,0.5209459236,0.1262764563\C,2.879  
3525878,0.6448730102,-0.0638217239\C,3.6708558161,-0.4809232122,-0.229  
732757\C,3.1038113354,-1.7507927548,-0.2117266453\C,1.7208568988,-1.89  
74825312,-0.0273806852\C,0.9242408342,-0.7496464401,0.1399727202\C,-2.  
7810360168,2.6221365385,0.0242353946\C,-3.3544608866,1.5698557463,-0.7  
050437332\C,-4.7298521428,1.5072350089,-0.8855102435\C,-5.5584903751,2  
.4922101629,-0.3444054725\C,-4.999485412,3.5367892188,0.3864690163\C,-  
3.6202498593,3.6033281816,0.5710488444\O,3.5229116489,1.8675019397,-0.  
0974938243\H,0.6487981389,6.2383970159,0.2317653705\H,4.7355388651,-0.  
3410440761,-0.3784516721\H,-0.1433766728,-0.8417682236,0.2809641663\H,  
-2.7027159723,0.8157965788,-1.1291729619\H,-5.1584432678,0.6904833773,  
-1.4571678554\H,-5.6358643785,4.2996359643,0.8229481163\H,-3.204443111  
6,4.3992375263,1.1799281149\H,3.1079848974,6.3652524101,-0.1223052547\  
H,4.4573226558,4.2650750825,-0.2717657274\H,3.7254225914,-2.6283880848  
, -0.3399396359\H,-6.6323656509,2.4428922105,-0.4913841395\C,1.12494504  
65,-3.1898544359,-0.0044246911\C,0.6189511403,-4.2927530126,0.01776008  
04\C,0.0248156674,-5.5860420161,0.0470300152\C,-1.3519943694,-5.736724  
0992,0.2944286232\C,0.8032253647,-6.7378448481,-0.1694086676\C,-1.9278  
161937,-7.0013070845,0.3239783894\C,0.2194254032,-7.9987214283,-0.1383  
745929\C,-1.1465727969,-8.1365891674,0.1081077555\H,-1.9562950089,-4.8  
523294521,0.4626753605\H,1.864803792,-6.6273244135,-0.360458447\H,-2.9  
911810383,-7.1015535246,0.5167461478\H,0.8331651649,-8.8777922708,-0.3  
070751321\H,-1.5993458149,-9.1223483926,0.1321484992\H,-1.3216944079,4  
.7178869162,0.2037674992\\Version=ES64L-G09RevD.01\State=1-A\HF=-1278.  
5657506\RMSD=1.585e-09\RMSF=1.031e-06\Dipole=-0.7947286,1.1153647,-0.2  
391737\Quadrupole=3.9867,12.564858,-16.5515579,-2.6427588,-1.0565746,1  
.0717422\PG=C01 [X(C27H17N3O1)]\

No imaginary frequencies.

### 1t-leuco (X=OAc)

1\1\GINC-LOCALHOST\FOpt\RB3LYP\6-31G(2d,p)\C21H15N3O3\PIOTR\29-Sep-202  
0\0\#P B3LYP/6-31G(2d,p) FOpt=tight freq(noraman) SCF=Direct #P Geom=  
(NoDistance,NoAngle) fcheck\\Parent flat C(8)-O-Ph(N1)-10-OAc benzotra  
ziny1-H, leuco C1\\0,1\N,-0.2696257976,0.7514850191,0.3829818941\N,-2.  
9809592154,0.7537779493,0.3261203522\C,-2.2194849171,-0.4197227428,0.1  
829273941\N,-0.9327182157,-0.4490292632,0.2150399659\C,-0.8900834053,4  
.3324116771,-0.3744444454\C,-0.2193440225,3.1378539213,-0.1157354474\C  
, -0.9314191042,1.9657781922,0.1044468791\C,-2.3238465923,1.9795873761,  
0.0657389779\C,-3.0036167084,3.1615952771,-0.2040191632\C,-2.279309929  
2,4.3368052417,-0.4203944452\C,1.1272190437,0.7378274178,0.2979592155\  
C,1.8084884861,1.9498735994,0.090461882\C,3.1913186197,1.9786625245,0.  
0339600009\C,3.9381263722,0.8092293753,0.1802029109\C,3.2589391515,-0.  
3855265048,0.374117795\C,1.8697810007,-0.4338088511,0.4334774823\C,-2.  
9583548053,-1.687676954,0.029512138\C,-2.3337823764,-2.7990253647,-0.5  
559731997\C,-3.0228947364,-3.9951880852,-0.7054498048\C,-4.3470625241,  
-4.1052900071,-0.2762609673\C,-4.9737137077,-3.0098931926,0.3112622117  
\C,-4.2859745711,-1.8080900231,0.4644526418\O,1.1502165283,3.160041679  
, -0.0649897655\H,-4.0883352902,3.1650143335,-0.2332603682\H,3.67773264  
63,2.9329007719,-0.1326019496\H,1.3614469873,-1.3744347261,0.590293729  
2\H,-1.30989874,-2.7002995083,-0.8952928483\H,-2.5287093875,-4.8445276  
9,-1.1658899017\H,-5.9981261076,-3.0893408657,0.660126277\H,-4.7736835  
602,-0.9772533519,0.9634922721\H,-2.8070627478,5.2626634456,-0.6192614  
075\H,-0.3085747417,5.2329027726,-0.5311684013\H,5.0172388542,0.833153  
664,0.1302748268\H,-4.884377442,-5.0399066325,-0.3989169958\O,3.914781  
0511,-1.5950407306,0.6059770095\C,4.9023536363,-2.0158171337,-0.239893  
4881\O,5.2775897367,-1.4097116434,-1.2060314968\C,5.4341599399,-3.3456  
329817,0.2321074991\H,5.8306998759,-3.2498619536,1.2469672282\H,4.6259  
219913,-4.0814557781,0.2678136099\H,6.2177810223,-3.6822396969,-0.4452

530988\H,-3.9074402977,0.6881834435,-0.0734949984\\Version=ES64L-G09RevD.01\State=1-A\HF=-1199.2284708\RMSD=4.708e-09\RMSF=4.826e-07\Dipole=-1.4587533,-0.4492958,0.1951928\Quadrupole=6.079383,6.7628533,-12.8422363,-3.1060008,6.6319385,-1.2011255\PG=C01 [X(C21H15N3O3)]\

No imaginary frequencies.

### 1u-leuco (X=NHCOCF<sub>3</sub>)

1\1\GINC-LOCALHOST\FOpt\RB3LYP\6-31G(2d,p)\C21H13F3N4O2\PIOTR\09-May-2021\0\#P B3LYP/6-31G(2d,p) FOpt=tight freq(noraman) SCF=Direct #P Geom=(NoDistance,NoAngle) fcheck\\Parent flat C(8)-O-Ph(N1)-10-NHCOCF3 2nd benzotrazinyl-H, leuco C1\\0,1\N,-1.2416505455,-0.8782728321,0.2781747278\N,-3.5936703539,0.4634047892,0.4039509135\C,-2.3675751342,1.1046933932,0.1617712512\N,-1.235141001,0.493498894,0.1070795347\C,-3.6068175977,-3.6886205423,-0.2537054573\C,-2.4156919451,-2.9804163093,-0.1016593301\C,-2.4364418605,-1.60735813,0.1055006304\C,-3.6518622046,-0.9294543808,0.1619349315\C,-4.8456887398,-1.6220453149,-0.0013924362\C,-4.8156814356,-3.0040817819,-0.2062134348\C,-0.0326483598,-1.5594632622,0.1172032072\C,-0.0566421801,-2.9529916712,-0.0754666743\C,1.1256691273,-3.6578153426,-0.2094939166\C,2.3633074183,-3.0149922137,-0.1594827745\C,2.389714212,-1.6326550212,0.0250144175\C,1.1969604181,-0.9109174226,0.1614511797\C,-2.3944744797,2.5716528918,0.004320984\C,-1.3632969384,3.2238683411,-0.6874575931\C,-1.3819124022,4.6040167941,-0.8398273995\C,-2.42920267,5.3584180803,-0.3074256185\C,-3.4547354561,4.7207320981,0.3852089347\C,-3.4397775383,3.336538737,0.541282748\O,-1.2352049981,-3.6768347181,-0.1430674837\H,1.0677771862,-4.7296045245,-0.3615283432\H,1.2045662404,0.1630365997,0.3013423407\H,-0.5613219871,2.6287958116,-1.1069240867\H,-0.5807885319,5.0943859833,-1.3832165397\H,-4.2662896978,5.2995818734,0.8137243451\H,-4.2229134146,2.8583005609,1.1201416098\H,-5.7458123739,-3.5486564221,-0.3222029791\H,-3.5606080779,-4.7605876946,-0.4029237646\H,3.2829606481,-3.5690431761,-0.2636840921\H,-2.4433370894,6.4360819612,-0.4322391472\H,-5.7893322646,-1.0881594712,0.0424640197\N,3.5873383365,-0.8848859549,0.0867836291\H,3.4811471161,0.1065654429,0.243566461\C,4.8635669492,-1.3260367241,-0.0400113624\O,5.2464697108,-2.4618062997,-0.2263747337\C,5.9175440355,-0.1944655031,0.0666054482\H,-4.3968696449,0.9782667737,0.0692994721\F,5.3625793715,1.0138146333,0.329939154\F,6.5923739895,-0.086714789,-1.0801239117\F,6.7853383331,-0.4633338166,1.0419838991\\Version=ES64L-G09RevD.01\State=1-A\HF=-1477.0851582\RMSD=3.855e-09\RMSF=5.730e-07\Dipole=-2.4544922,1.4042853,-0.1131452\Quadrupole=-2.7889618,7.6519615,-4.8629996,3.270043,0.8389889,-0.4204144\PG=C01 [X(C21H13F3N4O2)]\@

No imaginary frequencies.

### 1v-leuco (X=NHCOOMe)

1\1\GINC-LOCALHOST\FOpt\RB3LYP\6-31G(2d,p)\C21H16N4O3\PIOTR\11-May-2021\0\#P B3LYP/6-31G(2d,p) FOpt=tight freq(noraman) SCF=Direct #P Geom=(NoDistance,NoAngle) fcheck guess=check\\Parent flat C(8)-O-Ph(N1)-10-NHCOOMe 2nd benzotrazinyl-H, leuco C1\\0,1\N,-0.6956190499,-0.9006278156,-0.2755873936\N,-3.1050591626,0.3336128723,-0.4255670157\C,-1.910507185,1.0287509564,-0.1654290499\N,-0.7532514436,0.467532597,-0.0992748317\C,-2.9387034991,-3.8111553384,0.2552250028\C,-1.7772594823,-3.052814139,0.1084293134\C,-1.8576769882,-1.6825624768,-0.1080864027\C,-3.101975855,-1.0601042834,-0.1769017275\C,-4.2655488173,-1.8033019418,-0.0186022549\C,-4.1761561014,-3.1816804292,0.1942877271\C,0.5432655327,-1.5291627515,-0.1038056489\C,0.5777483794,-2.9193212038,0.0974840381\C,1.7901927318,-3.5683462,0.2406629506\C,2.9976641464,-2.8713575495,0.190439135\C,2.969207563,-1.4892650533,-0.0045589673\C,1.7430378259,-0.8264214493,-0.149500986\C,-2.0044789797,2.4922670282,-0.0050382639\C,-1.0024231388,3.1912690521,0.6845266708\C,-1.0850939155,4.5686865613,0.83

97752557\C,-2.1685940715,5.2748215448,0.3132283967\C,-3.165462817,4.59  
10671224,-0.3770526304\C,-3.0861258288,3.2093518778,-0.5363682677\O,-0  
.5706976039,-3.6964455854,0.1651966832\H,1.780534983,-4.640850344,0.39  
98023998\H,1.7024392541,0.2455426782,-0.2983416826\H,-0.1720297943,2.6  
330341917,1.0994271929\H,-0.3056159681,5.0948409891,1.3813474833\H,-4.  
0050751795,5.1320168947,-0.8011440756\H,-3.8482716691,2.6968212454,-1.  
1138962686\H,-5.0822091958,-3.7664190654,0.3061150348\H,-2.8461809644,  
-4.8792178292,0.4112074679\H,3.9406098377,-3.3835172496,0.3019732928\H  
, -2.2327708221,6.3503657086,0.4409975848\H,-5.23126279,-1.3113846054,-  
0.0727176959\N,4.1282392201,-0.693138506,-0.0701968574\H,3.9919600562,  
0.2931950674,-0.2293469256\C,5.432956389,-1.0829774385,0.0539417737\O,  
5.8502658704,-2.2029604832,0.2473433261\O,6.2251638334,0.0145902355,-0  
.0766496886\C,7.6261145993,-0.2520412366,0.0307456705\H,7.867168912,-0  
.6748219757,1.009142553\H,7.9489447188,-0.9508930435,-0.7447324472\H,8  
.1182813581,0.7121178018,-0.0979904084\H,-3.9320547584,0.8100075292,-0  
.0914357131\\Version=ES64L-G09RevD.01\State=1-A\HF=-1254.5978043\RMSD=  
3.614e-09\RMSF=1.834e-06\Dipole=-1.008754,1.5254916,0.1188601\Quadrupo  
le=11.1696735,-0.1269464,-11.0427271,5.5502957,-0.5053337,0.457126\PG=  
C01 [X(C21H16N4O3)]\@

No imaginary frequencies.

### 1a<sup>+</sup> (X=H)

1\1\GINC-LOCALHOST\FOpt\RB3LYP\6-31G(2d,p)\C19H12N3O1(1+)\PIOTR\04-May  
-2016\0\#\#P B3LYP/6-31G(2d,p) FOpt=tight freq(noraman, ReadIso) SCF=Di  
rect #P Geom=(NoDistance,NoAngle) fcheck\Oxo benzotrazinyl cat (phena  
zinoBT), start at the radical Cs geom\1,1\N,-0.1988756319,0.,-0.69250  
91965\N,1.649128296,0.,1.2964759969\C,0.3412030135,0.,1.5256934831\N,-  
0.6134412803,0.,0.5410135783\C,2.8625278201,0.,-2.6962208256\C,1.51966  
04648,0.,-2.3978540063\C,1.118153928,0.,-1.0434203374\C,2.0740464367,0  
.0203671905\C,3.4412905429,0.,-0.3178600457\C,3.8089626238,0.,-1.64  
80047498\C,-1.1732753446,0.,-1.7287606829\C,-0.7240976806,0.,-3.060539  
4953\C,-1.6438131199,0.,-4.1041960641\C,-3.0001260818,0.,-3.8129766803  
\C,-3.4508090052,0.,-2.4846954744\C,-2.5429470151,0.,-1.4412025678\C,-  
0.1569013212,0.,2.9039115534\C,-1.5346643329,0.,3.1818566201\C,-1.9792  
283511,0.,4.4972434193\C,-1.059841532,0.,5.546625932\C,0.3101547508,0.  
,5.2781598268\C,0.7630283998,0.,3.9664806456\O,0.5966566135,0.,-3.3938  
721534\H,4.1706632214,0.,0.4818754068\H,-1.2738937171,0.,-5.1222885159  
\H,-4.5128356526,0.,-2.2714798608\H,-2.8645748475,0.,-0.4094441052\H,-  
2.2500106585,0.,2.3697819535\H,-3.0432015111,0.,4.7057863922\H,1.02439  
10228,0.,6.0938504792\H,1.8235924053,0.,3.749516488\H,4.8613610169,0.,  
-1.9094092749\H,3.1747001851,0.,-3.7333910196\H,-3.7170824135,0.,-4.62  
61666533\H,-1.4105242441,0.,6.5730927436\\Version=ES64L-G09RevD.01\Sta  
te=1-A'\HF=-970.5216544\RMSD=3.632e-09\RMSF=3.145e-06\Dipole=-0.082706  
1,0.,-1.4724509\Quadrupole=8.4409884,-28.9286831,20.4876947,0.,0.32620  
55,0.\PG=CS [SG(C19H12N3O1)]\@

No imaginary frequencies.

### 1b<sup>+</sup> (X=COOMe)

1\1\GINC-LOCALHOST\FOpt\RB3LYP\6-31G(2d,p)\C21H14N3O3(1+)\PIOTR\09-May  
-2021\0\#\#P B3LYP/6-31G(2d,p) FOpt=tight freq(noraman) SCF=Direct #P G  
eom=(NoDistance,NoAngle) fcheck\Parent flat C(8)-O-Ph(N1)-COOMe sec o  
rient cat benzotrazinyl, Cs\1,1\N,-0.1838497452,0.8332110225,0.\N,-2.  
8978479055,0.8992782189,0.\C,-2.2026127901,-0.2324852157,0.\N,-0.83263  
55385,-0.2945320811,0.\C,-0.7120374364,4.4535623663,0.\C,-0.0464956414  
,3.2503165179,0.\C,-0.7940304287,2.0519926514,0.\C,-2.2239846733,2.062  
7316244,0.\C,-2.8769482445,3.311275201,0.\C,-2.1248129902,4.4678731717  
,0.\C,1.2389450058,0.7910340847,0.\C,1.9380552823,2.0117919295,0.\C,3.

3300549581,2.0159123926,0.\C,4.0094584259,0.8102952149,0.\C,3.31584464  
48,-0.4127748076,0.\C,1.9293096863,-0.4236460355,0.\C,-2.9043325972,-1  
.5187406257,0.\C,-2.1985850975,-2.7343221766,0.\C,-2.8889710742,-3.938  
9964515,0.\C,-4.2841410544,-3.9463864144,0.\C,-4.9915499936,-2.7428199  
525,0.\C,-4.3097433031,-1.5342622934,0.\O,1.3124248803,3.2189803856,0.  
\H,3.8481457247,2.9671994533,0.\H,1.3821506798,-1.3545738941,0.\H,-1.1  
163380548,-2.7309897577,0.\H,-2.339980041,-4.8739550902,0.\H,-6.075720  
0251,-2.7489398907,0.\H,-4.8505359653,-0.596493602,0.\H,-2.6263168204,  
5.4293036609,0.\H,-0.1421080712,5.3746376608,0.\H,5.0929606374,0.78204  
37863,0.\H,-4.8201321337,-4.8894281291,0.\H,-3.9592412858,3.327222131,  
0.\C,4.1306650906,-1.6706426891,0.\O,5.3368187035,-1.6670380192,0.\O,3  
.364764001,-2.7670088992,0.\C,4.0840319767,-4.0193608974,0.\H,3.319385  
4627,-4.7940048089,0.\H,4.7109043691,-4.0910737376,-0.8904501794\H,4.7  
109043691,-4.0910737376,0.8904501794\\Version=ES64L-G09RevD.01\State=1  
-A'\HF=-1198.4086879\RMSD=5.732e-09\RMSF=2.561e-06\Dipole=-0.9660029,1  
.395755,0.\Quadrupole=3.6598874,25.1296873,-28.7895747,0.0917096,0.,0.  
\PG=CS [SG(C21H12N3O3),X(H2)]\@  
No imaginary frequencies.

### 1c<sup>+</sup> (X=CN)

1\1\GINC-LOCALHOST\FOpt\RB3LYP\6-31G(2d,p)\C20H11N4O1(1+)\PIOTR\10-May  
-2021\0\#\#P B3LYP/6-31G(2d,p) FOpt=tight freq(noraman) SCF=Direct #P G  
eom=(NoDistance,NoAngle) fcheck\\Parent flat C(8)-O-Ph(N1)-CN benzotra  
zinyl cat, Cs\\1,1\N,0.4714064961,-0.3340878567,0.\N,-1.9155619688,-1.  
6188126063,0.\C,-1.8104472302,-0.2928126554,0.\N,-0.6151023891,0.38017  
89754,0.\C,1.6410209183,-3.7989353221,0.\C,1.6901105128,-2.4258991558,  
0.\C,0.4813813637,-1.6954077116,0.\C,-0.7902707006,-2.3516884198,0.\C,  
-0.8073917089,-3.7616052864,0.\C,0.3863071396,-4.4517800603,0.\C,1.723  
7655933,0.3475893317,0.\C,2.8986143413,-0.4232724992,0.\C,4.1411101674  
,0.2069589796,0.\C,4.2066555853,1.5887673905,0.\C,3.0289497239,2.36460  
09964,0.\C,1.7851159259,1.7402443157,0.\C,-3.0166776825,0.5352572817,0  
\C,-2.9380566379,1.939310656,0.\C,-4.0986785031,2.7008009981,0.\C,-5.  
3457760799,2.0749225609,0.\C,-5.4318255106,0.6812094673,0.\C,-4.277146  
6395,-0.0878714646,0.\O,2.8894508558,-1.7808969004,0.\H,5.0351778861,-  
0.404481426,0.\H,0.8713271615,2.3167662481,0.\H,-1.9727798984,2.428569  
0886,0.\H,-4.0322692964,3.7828760749,0.\H,-6.4013626497,0.196050965,0.  
\H,-4.3352679849,-1.1688255504,0.\H,0.375101915,-5.5360586378,0.\H,2.5  
655778275,-4.3633414954,0.\H,5.1702251399,2.0843139765,0.\H,-6.2507456  
727,2.6729014071,0.\H,-1.7652154862,-4.2657971571,0.\C,3.1065883118,3.  
7942267006,0.\N,3.1668742944,4.9506923109,0.\\Version=ES64L-G09RevD.01  
\State=1-A'\HF=-1062.7511038\RMSD=4.922e-09\RMSF=1.844e-06\Dipole=0.50  
17247,-2.5609908,0.\Quadrupole=24.8661209,-1.6884381,-23.1776828,-13.1  
602527,0.,0.\PG=CS [SG(C20H11N4O1)]\@  
No imaginary frequencies.

### 1d<sup>+</sup> (X=NO<sub>2</sub>)

1\1\GINC-LOCALHOST\FOpt\RB3LYP\6-31G(2d,p)\C19H11N4O3(1+)\PIOTR\11-May  
-2021\0\#\#P B3LYP/6-31G(2d,p) FOpt=tight freq(noraman) SCF=Direct #P G  
eom=(NoDistance,NoAngle) fcheck\\Parent flat C(8)-O-Ph(N1)-NO2 benzotr  
azinyl cat, Cs\\1,1\N,0.1488758498,-0.6143173056,0.\N,-2.469022437,-1.  
3147092577,0.\C,-2.0613379997,-0.047892488,0.\N,-0.7430169924,0.330986  
6746,0.\C,0.4909211474,-4.2540562242,0.\C,0.8544141609,-2.9295258324,0  
\C,-0.1543855407,-1.9412118807,0.\C,-1.5430452417,-2.286686041,0.\C,-  
1.8839727805,-3.6554143356,0.\C,-0.8808885078,-4.6010249233,0.\C,1.524  
655176,-0.23941782,0.\C,2.4934988919,-1.2594194578,0.\C,3.8489447515,-  
0.9344943438,0.\C,4.2327189478,0.3966005258,0.\C,3.2528284341,1.392194  
9399,0.\C,1.9039188664,1.1015838271,0.\C,-3.0428127981,1.0365722365,0.



\C,-2.639799022,2.3840987253,0.\C,-3.5922378544,3.3939117581,0.\C,-4.95049622234,3.0742683938,0.\C,-5.3580236248,1.7385728218,0.\C,-4.4134255964,0.7225592171,0.\O,2.1709216872,-2.5777788155,0.\H,4.5769009503,-1.7365013315,0.\H,1.1720237937,1.8956803287,0.\H,-1.5873147049,2.6360421873,0.\H,-3.2764632632,4.4309969077,0.\H,-6.4137297733,1.4919113289,0.\H,-4.7207297617,-0.3154032044,0.\H,-1.1407897292,-5.6537517573,0.\H,1.2605853896,-5.0162948039,0.\H,5.2762973068,0.6842222898,0.\H,-5.6920024399,3.865947964,0.\H,-2.9320751865,-3.9258696481,0.\N,3.6655550896,2.8121053411,0.\O,2.7739682548,3.6469465286,0.\O,4.8645816197,3.0355991349,0.\\Version=ES64L-G09RevD.01\State=1-A'\HF=-1175.0175948\RMSD=3.140e-09\RMSF=1.374e-06\Dipole=-0.5630317,-2.8929906,0.\Quadrupole=15.0748608,8.6000356,-23.6748964,-14.9554046,0.,0.\PG=CS [SG(C19H11N4O3)]\\  
No imaginary frequencies.

### 1e<sup>+</sup> (X=CF<sub>3</sub>)

1\1\GINC-LOCALHOST\FOpt\RB3LYP/6-31G(2d,p)\C20H11F3N3O1(1+)\PIOTR\11-May-2021\0\#\#P B3LYP/6-31G(2d,p) FOpt=tight freq(noraman) SCF=Direct #P  
Geom=(NoDistance,NoAngle) fcheck\\Parent flat C(8)-O-Ph(N1)-CF3 benzo  
traziny1, C1\\1,1\N,-0.1803658991,-0.7663288318,0.0052429049\N,-2.8801636159,-1.0265969822,-0.0156797013\C,-2.2690176848,0.1537493946,-0.0173470721\N,-0.9064690161,0.3124095095,-0.0068140236\C,-0.4449212954,-4.414386978,0.0232431896\C,0.1324017736,-3.1669890424,0.0210163287\C,-0.6996731149,-2.0256962259,0.0078531294\C,-2.1255607309,-2.1384490088,-0.003233344\C,-2.6871743956,-3.43122032,-0.0005905092\C,-1.8536993184,-4.5301385091,0.0123844388\C,1.2364259417,-0.6228428597,0.0170741723\C,2.0209361637,-1.787087864,0.0291767795\C,3.4105572506,-1.6878389143,0.0375408911\C,4.001747068,-0.4363959442,0.0348857123\C,3.2146768183,0.7266561172,0.0257572825\C,1.8361663361,0.6398570822,0.0145869368\C,-3.0602498142,1.3853762485,-0.0308469522\C,-2.4430851584,2.6486729982,-0.0337620415\C,-3.2175348979,3.8007948264,-0.0465620991\C,-4.6096376285,3.7080895535,-0.0565174124\C,-5.2295262111,2.4569296624,-0.0537165807\C,-4.4634399173,1.300225284,-0.0409925936\O,1.4867169025,-3.0369970354,0.0311815626\H,3.9976601737,-2.5980238115,0.043684656\H,1.2201763246,1.5269320911,0.0022693805\H,-1.3635534992,2.7244330231,-0.0260857127\H,-2.7364819839,4.7723688093,-0.0487878364\H,-6.3113239563,2.3856279685,-0.0614657584\H,-4.9360641355,0.3263236975,-0.038701511\H,-2.2842497604,-5.5253463691,0.0144119392\H,0.1891597636,-5.2925319722,0.0332788691\H,5.0825514747,-0.3525864724,0.0359123783\H,-5.2116716258,4.61032880939,-0.0664656024\H,-3.765455028,-3.5253056789,-0.0089061748\C,3.89930425,2.0760116528,0.0451180172\F,4.8324258379,2.1431251593,-0.9134446313\F,3.0245179346,3.0719503707,-0.1455085116\F,4.5105454159,2.2771871816,1.2208094992\\Version=ES64L-G09RevD.01\State=1-A'\HF=-1307.5581919\RMSD=2.565e-09\RMSF=2.351e-06\Dipole=-0.9638605,-2.4253393,-0.0169639\Quadrupole=12.6985269,15.0709282,-27.7694551,-8.9768706,0.2815242,-0.3318976\PG=C01 [X(C20H11F3N3O1)]\\  
No imaginary frequencies.

### 1f<sup>+</sup> (X=OMe)

1\1\GINC-LOCALHOST\FOpt\RB3LYP/6-31G(2d,p)\C20H14N3O2(1+)\PIOTR\10-May-2021\0\#\#P B3LYP/6-31G(2d,p) FOpt=tight freq(noraman) SCF=Direct #P  
eom=(NoDistance,NoAngle) fcheck\\Parent C(8)-O-Ph(N1)-10-OMe 2nd orint  
benzotraziny1 (phenazinoBT), Cs\\1,1\N,-0.3903760638,0.4808437228,0.\N,-1.8422802643,-1.8161876787,0.\C,-0.5167406261,-1.7997234229,0.\N,0.2443160198,-0.6582287346,0.\C,-3.7717836398,1.8881443558,0.\C,-2.395022643,1.8397634048,0.\C,-1.7508822631,0.5829199394,0.\C,-2.4956058109,-0.637316401,0.\C,-3.8994629219,-0.5554428771,0.\C,-4.507287188,0.6858404873,0.\C,0.378190382,1.6742077874,0.\C,-0.3106638007,2.8953703794,0.

\C,0.4110155722,4.0902425027,0.\C,1.7881499899,4.0535545826,0.\C,2.4877870732,2.8226471699,0.\C,1.7780963931,1.6270907336,0.\C,0.2252320781,-3.0657475777,0.\C,1.6299795056,-3.0892560641,0.\C,2.3066443998,-4.301923165,0.\C,1.5939774324,-5.5011468478,0.\C,0.1982002305,-5.4857197105,0.\C,-0.4853461858,-4.2778328218,0.\O,-1.6689573131,2.9850127344,0.\H,-4.4698249222,-1.4753625579,0.\H,-0.1322205697,5.0273676609,0.\H,2.2649982927,0.6650102887,0.\H,2.184965191,-2.1601483143,0.\H,3.3909000225,-4.3138246177,0.\H,-0.3563294846,-6.4174097333,0.\H,-1.5676250208,-4.2564780524,0.\H,-5.5899006226,0.7476488214,0.\H,-4.2678482977,2.8509039757,0.\H,2.3683269364,4.9688984934,0.\H,2.1255334682,-6.4466851897,0.\O,3.823197456,2.9266505433,0.\C,4.6088334812,1.7345823954,0.\H,4.4136795032,1.1379395405,-0.8978194327\H,5.6461823938,2.0656545477,0.\H,4.4136795032,1.1379395405,0.8978194327\\Version=ES64L-G09RevD.01\State=1-A'\HF=-1085.0535646\RMSD=6.671e-09\RMSF=1.713e-06\Dipole=-0.30248,0.8926329,0.\Quadrupole=15.6751945,13.8309531,-29.5061477,-3.5778632,0.,0.\PG=CS [SG(C20H12N3O2),X(H2)]\

No imaginary frequencies.

### 1g<sup>+</sup> (X=F)

1\1\GINC-LOCALHOST\FOpt\RB3LYP\6-31G(2d,p)\C19H11F1N3O1(1+)\PIOTR\11-May-2021\0\#P B3LYP/6-31G(2d,p) FOpt=tight freq(noraman) SCF=Direct #P  
Geom=(NoDistance,NoAngle) fcheck\\Parent C(8)-O-Ph(N1)-10-F benzotrazinyl (phenazinoBT), Cs\\1,1\N,-0.1976912344,0.,-0.6928742098\N,1.6472667009,0.,1.2954604074\C,0.33916695,0.,1.5255647658\N,-0.6151190625,0.,0.539786225\C,2.8635589966,0.,-2.6967623607\C,1.5202160319,0.,-2.3994229547\C,1.1183326378,0.,-1.0449204285\C,2.0737970902,0.,0.0199921746\C,3.4407623252,0.,-0.3175054372\C,3.8089725181,0.,-1.647888882\C,-1.1721475631,0.,-1.7293422404\C,-0.7232417067,0.,-3.0597317809\C,-1.647618909,0.,-4.1023283392\C,-3.0026313882,0.,-3.8181022098\C,-3.4294589247,0.,-2.4851231247\C,-2.5372889753,0.,-1.4317235341\C,-0.158694043,0.,2.9031158687\C,-1.5366450875,0.,3.1812609324\C,-1.9805090662,0.,4.4967995369\C,-1.0605821813,0.,5.5457440519\C,0.3095162735,0.,5.277134818\C,0.7618178516,0.,3.9653978639\O,0.5969196886,0.,-3.3951044486\H,4.1699694516,0.,0.4823533614\H,-1.282245549,0.,-5.1219599822\H,-2.8827487458,0.,-0.4084030957\H,-2.2529296506,0.,2.3699911285\H,-3.0443508742,0.,4.7058537151\H,1.0239554381,0.,6.0926163296\H,1.8222762019,0.,3.7479935952\H,4.8614965942,0.,-1.9087865674\C,3.1767619944,0.,-3.7336354122\H,-3.7415875048,0.,-4.6105093652\H,-1.4110008118,0.,6.572299281\F,-4.7296120266,0.,-2.228269902\\Version=ES64L-G09RevD.01\State=1-A'\HF=-1069.7508946\RMSD=5.307e-09\RMSF=1.406e-06\Dipole=0.8405885,0.,-1.2952468\Quadrupole=3.8652904,-27.1898766,23.3245862,0.,-1.5305675,0.\PG=CS [SG(C19H11F1N3O1)]\

No imaginary frequencies.

### 1h<sup>+</sup> (X=Cl)

1\1\GINC-LOCALHOST\FOpt\RB3LYP\6-31G(2d,p)\C19H11Cl1N3O1(1+)\PIOTR\11-May-2021\0\#P B3LYP/6-31G(2d,p) FOpt=tight freq(noraman) SCF=Direct #P  
Geom=(NoDistance,NoAngle) fcheck\\Parent C(8)-O-Ph(N1)-10-Cl benzotrazinyl (phenazinoBT), Cs\\1,1\N,-0.1976569996,0.,-0.6925854007\N,1.6481923376,0.,1.2952993551\C,0.339836367,0.,1.5257476734\N,-0.6141744531,0.,0.5401004146\C,2.8634598695,0.,-2.6969372637\C,1.5207159623,0.,-2.3989607285\C,1.1184222545,0.,-1.0447536264\C,2.0740182623,0.,0.0198146546\C,3.4414318542,0.,-0.3181043328\C,3.8095876111,0.,-1.6481269237\C,-1.1721091102,0.,-1.7301182732\C,-0.7221026948,0.,-3.0600643046\C,-1.16472058961,0.,-4.1006930875\C,-3.0022391458,0.,-3.8147168256\C,-3.4429906273,0.,-2.4816074047\C,-2.5379708063,0.,-1.4343509514\C,-0.1584654304,0.,2.903081771\C,-1.5365862046,0.,3.1807838536\C,-1.9811013727,0.,4.4

961315179\C,-1.0616545141,0.,5.5454451291\C,0.3085434322,0.,5.27725039  
42\C,0.7615528223,0.,3.9657177177\O,0.5965871071,0.,-3.3952777618\H,4.  
1704489055,0.,0.4819863773\H,-1.2844097055,0.,-5.1213667821\H,-2.86688  
44559,0.,-0.4057267103\H,-2.2526334151,0.,2.3693214861\H,-3.0450832732  
,0.,4.7044465049\H,1.0226030937,0.,6.0930720451\H,1.8221182244,0.,3.74  
89541295\H,4.8620367027,0.,-1.9092296573\H,3.1763173158,0.,-3.73391789  
37\H,-3.7284009267,0.,-4.6184587635\H,-1.4124652893,0.,6.5718556549\C1  
, -5.1452721016,0.,-2.1455381874\\Version=ES64L-G09RevD.01\State=1-A'\HF=-  
1430.1106646\RMSD=3.647e-09\RMSF=4.486e-06\Dipole=1.310372,0.,-1.08  
32957\Quadrupole=6.0304869,-28.0843397,22.0538528,0.,-2.2180346,0.\PG=  
CS [SG(C19H11Cl1N3O1)]\\  
No imaginary frequencies.

### 1i<sup>+</sup> (X=Br)

1\1\GINC-LOCALHOST\FOpt\RB3LYP\Gen\C19H11Br1N3O1(1+)\PIOTR\11-May-2021  
\0\#P B3LYP/gen FOpt=tight freq(noraman) SCF=Direct #P Geom=(NoDistanc  
ce,NoAngle) fcheck Pseudo=Read\\Parent C(8)-O-Ph(N1)-10-Br benzotrazin  
yl (phenazinoBT) cat, Cs\\1,1\N,-0.2524646909,0.7810753508,0.\N,-2.961  
3848462,0.9378392923,0.\C,-2.3050215792,-0.217700441,0.\N,-0.937516027  
4,-0.3250755705,0.\C,-0.6570303823,4.4193379064,0.\C,-0.0307741642,3.1  
93205539,0.\C,-0.8194241506,2.0200141918,0.\C,-2.2498621997,2.07879521  
91,0.\C,-2.8609222822,3.3493964782,0.\C,-2.0691501418,4.480843581,0.\C  
,1.1683190664,0.6909694359,0.\C,1.9068305272,1.8860852926,0.\C,3.29923  
71205,1.8352668508,0.\C,3.942234353,0.6069643853,0.\C,3.1967528784,-0.  
584489338,0.\C,1.8119216431,-0.551520239,0.\C,-3.0503659359,-1.4799227  
382,0.\C,-2.3861446903,-2.719883894,0.\C,-3.1176696327,-3.9010464194,0  
4.4565142592,-1.4468493351,0.\O,1.3250298169,3.1148162185,0.\H,-3.9426  
253898,3.4020458982,0.\H,3.8559939295,2.7651716795,0.\H,1.2221063261,-  
1.4567464048,0.\H,-1.3039228495,-2.7548467573,0.\H,-2.6006883357,-4.85  
46341753,0.\H,-6.2639815514,-2.6012800254,0.\H,-4.9641976998,-0.490178  
4516,0.\H,-2.5381584668,5.4591397964,0.\H,-0.0564827969,5.3214669458,0  
1007855471,-2.2596651521,0.\\Version=ES64L-G09RevD.01\State=1-A'\HF=-9  
83.0625834\RMSD=9.662e-09\RMSF=3.782e-06\Dipole=-0.796885,2.1112732,0.  
\Quadrupole=13.3238502,16.1030864,-29.4269366,5.5570998,0.,0.\PG=CS [S  
G(C19H11Br1N3O1)]\\  
No imaginary frequencies.

### 1j<sup>+</sup> (X=Ac)

1\1\GINC-LOCALHOST\FOpt\RB3LYP\6-31G(2d,p)\C21H14N3O2(1+)\PIOTR\11-May  
-2021\0\#P B3LYP/6-31G(2d,p) FOpt=tight freq(noraman) SCF=Direct #P G  
eom=(NoDistance,NoAngle) fcheck\\Parent flat C(8)-O-Ph(N1)-COME benzot  
razinyl cat, sec orient Ac, Cs\\1,1\N,-0.1862105169,0.6345618623,0.\N,  
2.4072596737,1.4383193651,0.\C,2.0473013947,0.1598471568,0.\N,0.746169  
3216,-0.2738399465,0.\C,-0.6649268544,4.2617667307,0.\C,-0.9768073341,  
2.9226101343,0.\C,0.0688676738,1.973434392,0.\C,1.441663463,2.37397989  
09,0.\C,1.7293940937,3.7531966317,0.\C,0.6903326718,4.6609592043,0.\C,  
-1.5432410367,0.2065338851,0.\C,-2.5478616984,1.189911611,0.\C,-3.8887  
682633,0.8125574944,0.\C,-4.211636857,-0.5315034945,0.\C,-3.214127962,  
-1.5273075974,0.\C,-1.8787454625,-1.151534814,0.\C,3.0747864874,-0.884  
99783,0.\C,2.7305494558,-2.2477021545,0.\C,3.7246697682,-3.2169045442,  
0.\C,5.0682504896,-2.8408992405,0.\C,5.4179071228,-1.4893695134,0.\C,4  
.4305172434,-0.5143218669,0.\O,-2.2757243581,2.5212690721,0.\H,-4.6469  
628393,1.5864741325,0.\H,-1.0811305886,-1.8805534518,0.\H,1.6890641547  
, -2.5418301989,0.\H,3.4535791683,-4.2666876549,0.\H,6.4620679023,-1.19  
75265757,0.\H,4.693136239,0.5358123305,0.\H,0.9105321768,5.7227195505,

0.\H,-1.4645934208,4.9923690671,0.\H,-5.2460340707,-0.8559978296,0.\H,  
5.8425625474,-3.6005082847,0.\H,2.766335215,4.063625949,0.\C,-3.667276  
9776,-2.9703687114,0.\O,-4.8548270276,-3.2059864424,0.\C,-2.6260828861  
, -4.0654931646,0.\H,-1.9834990677,-3.9941771626,-0.8846941032\H,-1.983  
4990677,-3.9941771626,0.8846941032\H,-3.1327367821,-5.0300257815,0.\V  
ersion=ES64L-G09RevD.01\State=1-A'\HF=-1123.1708162\RMSD=7.177e-09\RMS  
F=1.011e-06\Dipole=0.6182815,1.6510001,0.\Quadrupole=6.422527,18.16469  
68,-24.5872238,-10.7332652,0.,0.\PG=CS [SG(C21H12N3O2),X(H2)]\\  
No imaginary frequencies.

### 11<sup>+</sup> (X=NH<sub>2</sub>)

1\1\GINC-LOCALHOST\FOpt\RB3LYP\6-31G(2d,p)\C19H13N4O1(1+)\PIOTR\10-May  
-2021\0\#\#P B3LYP/6-31G(2d,p) FOpt=tight freq(noraman) SCF=Direct #P G  
eom=(NoDistance,NoAngle) fcheck\Parent flat C(8)-O-Ph(N1)-NH2 benzotr  
azinyl cat, C1\1,1\N,0.1611049368,-0.6043423051,-0.0018467601\N,-2.46  
40139392,-1.3060774791,0.0035097137\C,-2.0533233391,-0.0461413767,0.00  
07173834\N,-0.7375392117,0.341454392,-0.0010349326\C,0.4970858171,-4.2  
525938283,-0.0039097414\C,0.8618605352,-2.9231385182,-0.0045008809\C,-  
0.1459202424,-1.9332672518,-0.001362595\C,-1.5327347919,-2.2814979331,  
0.0022179664\C,-1.8727220876,-3.6450923696,0.0032930144\C,-0.868740097  
6,-4.5960679514,0.0001163372\C,1.5291910269,-0.2231731404,-0.003301495  
3\C,2.4893887103,-1.2477553217,-0.0071833727\C,3.8417238544,-0.9093990  
026,-0.0088636503\C,4.2176568391,0.4171789231,-0.0083991145\C,3.257081  
8002,1.4632665428,-0.0042268863\C,1.9019319332,1.1204415969,0.00167658  
72\C,-3.0412494093,1.0395332849,-0.0004986949\C,-2.6448161539,2.386936  
0889,-0.0262025252\C,-3.6004678241,3.3946841461,-0.0285135068\C,-4.957  
4204223,3.0724002934,-0.0044545368\C,-5.3588384347,1.735797727,0.02130  
99204\C,-4.4098105179,0.7229742217,0.0228566665\O,2.170080395,-2.57183  
75199,-0.0084228365\H,4.5774747614,-1.7044790446,-0.0105682497\H,1.131  
6773204,1.8785052649,0.004896223\H,-1.5925275524,2.6389232587,-0.04648  
95841\H,-3.2883487257,4.4328985852,-0.0495866983\H,-6.4134440013,1.484  
6185006,0.039966406\H,-4.7121455798,-0.3162943146,0.0422470581\H,-1.13  
28914732,-5.6477706576,0.0005338192\H,1.2686276151,-5.0126398092,-0.00  
67021222\H,5.2730844596,0.668910778,-0.0150016948\H,-5.7014947481,3.86  
16966142,-0.0061001753\H,-2.920806056,-3.9153873983,0.0059734138\N,3.6  
651581001,2.768079245,-0.05232277\H,3.0017995874,3.4927509633,0.16922  
87764\H,4.6203677558,2.982936455,0.1838590451\Version=ES64L-G09RevD.0  
1\State=1-A'\HF=-1025.887688\RMSD=5.102e-09\RMSF=1.536e-06\Dipole=1.804  
312,0.0318124,0.2543333\Quadrupole=19.8179719,13.1744402,-32.9924121,3  
.059585,1.997198,1.7925956\PG=C01 [X(C19H13N4O1)]\\  
No imaginary frequencies.

### 1m<sup>+</sup> (X=NHAc)

1\1\GINC-LOCALHOST\FOpt\RB3LYP\6-31G(2d,p)\C21H15N4O2(1+)\PIOTR\10-May  
-2021\0\#\#P B3LYP/6-31G(2d,p) FOpt=tight freq(noraman) SCF=Direct #P G  
eom=(NoDistance,NoAngle) fcheck\Parent flat C(8)-O-Ph(N1)-NHAc benzotr  
razinyl cat, C1\1,1\N,0.3718112963,0.7311935285,0.0010054678\N,3.0884  
265842,0.715552541,0.0010727131\C,2.359952321,-0.3922553639,0.00231906  
01\N,0.9886318984,-0.4178097556,0.0023235754\C,1.0104873642,4.33730507  
68,-0.0030864325\C,0.3076138315,3.1524987368,-0.0017508833\C,1.0187014  
5,1.9318105868,-0.0003492015\C,2.4483871299,1.9012669189,-0.0002883371  
\C,3.1371542059,3.1273044678,-0.0016704452\C,2.4197991127,4.3085084187  
, -0.0030277976\C,-1.0477884302,0.7292687809,0.0009856347\C,-1.70669842  
72,1.9691213604,-0.00043761\C,-3.0976321645,1.9975963509,-0.0004926433  
\C,-3.8224871751,0.8206520732,0.000837675\C,-3.1631094815,-0.435362774  
8,0.0022813362\C,-1.768932088,-0.464932678,0.002335937\C,3.0272978419,  
-1.699267766,0.0038184729\C,2.2909727081,-2.8956754346,0.0051515744\C,

2.9484269214,-4.1188887915,0.0065559404\C,4.3426863251,-4.163813548,0.0066484599\C,5.0810651413,-2.9793045001,0.0053289471\C,4.4312512938,-1.7528826351,0.0039204411\O,-1.0478087929,3.1607108717,-0.0017843475\H,-3.5975347335,2.958810147,-0.0015964657\H,-1.2243368929,-1.3994319068,0.0034098542\H,1.2092273167,-2.8626800136,0.0050815794\H,2.3747835288,-5.039036569,0.0075804696\H,6.1647512098,-3.013712458,0.0054004357\H,4.9961982787,-0.8295215732,0.0028915823\H,2.9514453509,5.253607707,-0.0040933995\H,0.4673430748,5.2743512551,-0.0041625772\H,-4.9021931054,0.8385739463,0.0007997971\H,4.8535039182,-5.1207183207,0.0077474179\H,4.2194048576,3.1109567527,-0.0016318828\N,-3.8509460088,-1.6439626501,0.0036502751\H,-3.2769613986,-2.4746596968,0.0046109997\C,-5.2339423516,-1.8576721798,0.0038834322\O,-6.0346961463,-0.9496498349,0.0028358593\C,-5.6175979547,-3.3214071555,0.0055573472\H,-5.2219084878,-3.830402349,-0.8797197612\H,-5.2219406309,-3.828367173,0.8920158938\H,-6.7040156913,-3.3929333928,0.0056196061\\Version=ES64L-G09RevD.01\State=1-A\HF=-1178.5512413\RMSD=3.733e-09\RMSF=5.279e-07\Dipole=0.7344484,0.3250275,-0.0003527\Quadrupole=5.8429963,23.5231153,-29.3661116,8.6998052,-0.0093032,-0.0601303\PG=C01 [X(C21H15N4O2)]\\

No imaginary frequencies.

### 1n<sup>+</sup> (X=I)

1\1\GINC-LOCALHOST\FOpt\RB3LYP\Gen\C19H11I1N3O1(1+)\PIOTR\11-May-2021\0\#\#P B3LYP/gen FOpt=tight freq(noraman) SCF=Direct #P Geom=(NoDistance,NoAngle) fcheck Pseudo=Read\\Parent C(8)-O-Ph(N1)-10-I benzotrazinyl (phenazinoBT) cat, Cs\\1,1\N,-0.2528327453,0.7824188907,0.\N,-2.96201681,0.9389644068,0.\C,-2.3056266899,-0.2162243583,0.\N,-0.9382157782,-0.3236520661,0.\C,-0.6569488338,4.4206167752,0.\C,-0.0307659555,3.1943618869,0.\C,-0.8199372927,2.0213494066,0.\C,-2.2502051454,2.0799910381,0.\C,-2.8609479752,3.3505479926,0.\C,-2.0690001106,4.4820134289,0.\C,1.1676927251,0.6920596058,0.\C,1.9066095835,1.886716975,0.\C,3.2986462688,1.8337823414,0.\C,3.9400393188,0.6040248858,0.\C,3.1975463111,-0.5918684739,0.\C,1.8113835753,-0.5505974927,0.\C,-3.0501482418,-1.4792200632,0.\C,-2.3844365203,-2.7183246767,0.\C,-3.1145162237,-3.9004107394,0.\C,-4.5100960427,-3.8612884782,0.\C,-5.178027541,-2.6341427371,0.\C,-4.456255653,-1.4478987936,0.\O,1.3251681301,3.1155708993,0.\H,-3.9426539406,3.4034931488,0.\H,3.8566551372,2.7630630565,0.\H,1.2133552526,-1.4503921344,0.\H,-1.3021872837,-2.751755824,0.\H,-2.596300278,-4.85335217,0.\H,-6.262365167,-2.6045984201,0.\H,-4.9653241252,-0.491929135,0.\H,-2.5381828668,5.4602350422,0.\H,-0.0564393045,5.3227475928,0.\H,5.0234662987,0.5701389183,0.\H,-5.0772850347,-4.7865424504,0.\I,4.1868506389,-2.4394417885,0.\\Version=ES64L-G09RevD.01\State=1-A'\HF=-981.2768486\RMSD=5.504e-09\RMSF=1.650e-06\Dipole=-1.3726553,2.3943704,0.\Quadrupole=14.0620568,17.4813742,-31.5434311,1.5647732,0.,0.\PG=CS [SG(C19H11I1N3O1)]\\

No imaginary frequencies.

### 1p<sup>+</sup> (X=OBn)

1\1\GINC-LOCALHOST\FOpt\RB3LYP\6-31G(2d,p)\C26H18N3O2(1+)\PIOTR\13-May-2021\0\#\#P B3LYP/6-31G(2d,p) FOpt=tight freq(noraman) SCF=Direct #P Geom=(NoDistance,NoAngle) fcheck\\Parent C(8)-O-Ph(N1)-10-OBn 2nd orient benzotrazinyl (phenazinoBT) cat, C1\\1,1\N,-1.7540889369,-0.6609088611,0.0241652988\N,-4.2417210836,0.4343179902,-0.0121878494\C,-3.1331533696,1.1565872627,-0.0880080755\N,-1.8643303708,0.6351896592,-0.0722976803\C,-3.773658588,-3.7051898883,0.2937176052\C,-2.6587207074,-2.8995317932,0.2114342559\C,-2.8261620626,-1.501220959,0.1082759552\C,-4.1250030281,-0.9052503515,0.0874592124\C,-5.2433611851,-1.7530579228,0.1730109712\C,-5.0545991999,-3.1188030579,0.2732913302\C,-0.4505199736,-1.

2210533176,0.0421633479\C,-0.3406274041,-2.6152179292,0.1460936907\C,0.9250035659,-3.2034499739,0.1669443385\C,2.0462078701,-2.4076855717,0.0852872142\C,1.9426776897,-0.9978242177,-0.0199587679\C,0.6840994877,-0.4037929621,-0.0413812267\C,-3.2244920744,2.6174330356,-0.1973508951\C,-2.0724410069,3.4172527414,-0.2798586635\C,-2.1879981514,4.7973819646,-0.3826063499\C,-3.4485287631,5.3943965116,-0.4042509426\C,-4.5976727879,4.6061504053,-0.3226783703\C,-4.4904784076,3.2262580261,-0.2197898527\O,-1.417409274,-3.4440245384,0.2294227173\H,-6.2300469374,-1.3083157195,0.1578050772\H,0.9977791253,-4.2812192274,0.2475188875\H,0.5491780086,0.6628790029,-0.1199396002\H,-1.0935476744,2.9560219302,-0.2632308912\H,-1.2950738434,5.4092806897,-0.445944847\H,-5.5777093902,5.0696943788,-0.339459556\H,-5.3763754811,2.6074141273,-0.1560544092\H,-5.9181120786,-3.77139232,0.3391944771\H,-3.6469528511,-4.7778687958,0.3728861521\H,3.0385313758,-2.8431362737,0.0996760759\H,-3.5355981331,6.4726392215,-0.4845847936\O,3.1078997409,-0.3473831084,-0.0913996338\C,3.1060216478,1.1006519257,-0.2014719108\H,2.5877409215,1.512206885,0.6727019911\H,2.5541322272,1.3768227657,-1.1077390092\C,4.5295029822,1.567584443,-0.2638486865\C,5.1782857004,1.6875206145,-1.4956576912\C,5.2236986666,1.8705111345,0.9104533767\C,6.5064844972,2.1009454827,-1.5530830249\C,6.5519320538,2.284074759,0.854846391\C,7.1939900708,2.3988330758,-0.3773569665\H,4.6418823613,1.4575688792,-2.4117657407\H,4.7227015776,1.7832275701,1.870268011\H,7.0026768434,2.1946373288,-2.5130191906\H,7.083520601,2.5203936195,1.7702860387\H,8.2276965802,2.724790659,-0.4216569205\\Version=ES64L-G09RevD.01\State=1-A\HF=-1316.1169621\RMSD=2.064e-09\RMSF=1.078e-06\Dipole=-1.7021816,-1.4117713,0.1394586\Quadrupole=24.4445931,9.5223489,-33.966942,11.4892162,-1.9812561,-3.5465444\PG=C01 [X(C26H18N3O2)]\@

No imaginary frequencies.

### 1q<sup>+</sup> (X=Ph)

1\1\GINC-LOCALHOST\FOpt\RB3LYP/6-31G(2d,p)\C25H16N3O1(1+)\PIOTR\12-May-2021\0\#\#P B3LYP/6-31G(2d,p) FOpt=tight freq(noraman) SCF=Direct #P Geom=(NoDistance,NoAngle) fcheck\\Parent C(8)-O-Ph(N1)-10-Ph benzotrazinyl (phenazinoBT) cat, C1\\1,1\N,-0.2707841031,-1.2482511569,-1.0499406531\N,1.5069703121,-2.4552131415,0.6129618688\C,0.1992494456,-2.4456240221,0.8366936912\N,-0.7209548808,-1.8431192902,0.0179576681\C,2.8410218924,-0.5195622777,-2.8364295974\C,1.4944892391,-0.5426658154,-2.550582065\C,1.0513808461,-1.1991662835,-1.3809519965\C,1.9695622921,-1.8385712032,-0.4910905633\C,3.3396918355,-1.7973984196,-0.8104116608\C,3.7487655246,-1.1493154858,-1.9592329573\C,-1.2077319478,-0.616436652,-1.9123081725\C,-0.7158846709,0.0143642634,-3.0675773743\C,-1.6059738591,0.6315962666,-3.939898976\C,-2.9600746101,0.6157886716,-3.6544985684\C,-3.4780272762,-0.0136077738,-2.4984012652\C,-2.5765999911,-0.6320995439,-1.6345670555\C,-0.3398166794,-3.1107427633,2.0276654033\C,-1.7211702023,-3.1431311802,2.2833793997\C,-2.2042476228,-3.7817884861,3.4180102322\C,-1.3200838465,-4.3921558477,4.307744681\C,0.0534479395,-4.3638606124,4.0600955986\C,0.5443546325,-3.7286878371,2.9280258092\O,0.607600302,0.0570931791,-3.3840321216\H,4.0398524865,-2.2797701654,-0.1405767938\H,-1.2143058864,1.1234503046,-4.822088582\H,-2.9214501515,-1.1504346871,-0.7516831733\H,-2.4094134414,-2.6719092207,1.5937867616\H,-3.2712705401,-3.8048613379,3.6092928756\H,0.7408769404,-4.8382434125,4.7514555845\H,1.6078903648,-3.702370941,2.727966782\H,4.8043416831,-1.178562357,-2.2054288206\H,3.1831204226,-0.0170348405,-3.7328163049\H,-3.6415708061,1.1222508093,-4.328106045\H,-1.7007762432,-4.889913172,5.1931585158\C,-4.9296795675,-0.0093123128,-2.2160754204\C,-5.4032606154,0.1043390274,-0.9003450007\C,-5.8596507843,-0.1190938031,-3.2608520732\C,-6.7688479406,0.1078595448,-0.6376369551\C,-7.2248883818,-0.1216901219,-2.9952168875\C,-7.6832308058,-0.0069789575,-1.6838207181\H,-4.70

03472988,0.2286343572,-0.0827934235\H,-5.5151638425,-0.2374836769,-4.2829940052\H,-7.1196958534,0.2108253983,0.3834637287\H,-7.9307235649,-0.2189063489,-3.812830826\H,-8.748054975,-0.0039259761,-1.4782166943\\Version=ES64L-G09RevD.01\State=1-A\HF=-1201.591051\RMSD=2.549e-09\RMSF=2.954e-06\Dipole=1.3113743,0.27872,-0.7450005\Quadrupole=22.7100265,-24.5055985,1.795572,-4.7733948,-1.6203061,-19.4094576\PG=C01 [X(C25H16N3O1)]\\

No imaginary frequencies.

### 1r<sup>+</sup> (X=2-thienyl)

1\1\GINC-LOCALHOST\FOpt\RB3LYP\6-31G(2d,p)\C23H14N3O1S1(1+)\PIOTR\12-May-2021\0\#P B3LYP/6-31G(2d,p) FOpt=tight freq(noraman) SCF=Direct #P Geom=(NoDistance,NoAngle) fcheck\\Parent C(8)-O-Ph(N1)-10-Thio benzotrazinyl (phenazinoBT), C1\\1,1\N,-0.4842604176,-2.2243639445,-2.1748690501\N,1.0895375958,-4.3586947875,-1.5834592201\C,-0.2145549554,-4.3333450528,-1.3422765422\N,-1.0339441629,-3.2712358188,-1.6264309851\C,2.7456767678,-0.953382077,-3.3415890495\C,1.39685324,-0.9866903394,-3.0662460421\C,0.8443885248,-2.142011201,-2.4708322783\C,1.6549944207,-3.2750781523,-2.1494089572\C,3.0296620207,-3.210883672,-2.4423428034\C,3.5467785263,-2.0698595569,-3.0245813473\C,-1.3159752999,-1.1113554492,-2.4772675668\C,-0.7169412877,0.0093838938,-3.0772450333\C,-1.5042119354,1.1106703023,-3.3997641847\C,-2.8569683575,1.0886999617,-3.1176524093\C,-3.4830041907,-0.0299698153,-2.5124436564\C,-2.684019135,-1.1343684555,-2.2068114835\C,-0.8627598682,-5.4984723525,-0.7304892634\C,-2.2457585545,-5.5179892234,-0.4835798379\C,-2.8344032026,-6.6347304733,0.095019144\C,-2.0542161011,-7.7403758667,0.4338958189\C,-0.679535852,-7.7281265936,0.1915897655\C,-0.0837426354,-6.6163902417,-0.3873306102\O,0.6105443551,0.0781655337,-3.3653000959\H,3.6486402227,-4.0655267329,-2.2015013135\H,-1.0335736387,1.9716990379,-3.8586621438\H,-3.1098338671,-2.0280983077,-1.7754445931\H,-2.852836689,-4.6617361349,-0.7472569105\H,-3.9024132252,-6.6446692559,0.2818218399\H,-0.0730538183,-8.5874774072,0.454832255\H,0.981501301,-6.598685659,-0.5791847476\H,4.6061972088,-2.0208572537,-3.2505027831\H,3.1708720829,-0.0682142059,-3.7985133728\H,-3.4497921959,1.9651119978,-3.3547796502\H,-2.5167066635,-8.6112155769,0.885992914\C,-4.9093559709,-0.0340200597,-2.2105603977\C,-5.586038495,-0.8125937249,-1.2948355161\C,-6.9799160939,-0.5613046762,-1.2592224983\C,-7.3630033482,0.4059904752,-2.1501330404\S,-6.0257134481,1.0231130567,-3.0418361507\H,-5.0935690661,-1.5218570522,-0.6409489539\H,-7.6685665371,-1.0697055578,-0.5969845813\H,-8.3536283835,0.7923180892,-2.3390248571\\Version=ES64L-G09RevD.01\State=1-A\HF=-1522.3453716\RMSD=6.910e-09\RMSF=1.830e-06\Dipole=1.2747426,0.2978556,-0.2465756\Quadrupole=23.2423822,3.620537,-26.8629193,-5.6975095,-9.4290689,-16.7052568\PG=C01 [X(C23H14N3O1S1)]\\

No imaginary frequencies.

### 1s<sup>+</sup> (X=CCPh)

1\1\GINC-LOCALHOST\FOpt\RB3LYP\6-31G(2d,p)\C27H16N3O1(1+)\PIOTR\12-May-2021\0\#P B3LYP/6-31G(2d,p) FOpt=tight freq(noraman) SCF=Direct #P Geom=(NoDistance,NoAngle) fcheck\\Parent C(8)-O-Ph(N1)-10-CCPh benzotrazinyl (phenazinoBT), Cs\\1,1\N,0.7111553334,1.7308806367,0.\N,-0.7608946222,4.0145067312,0.\C,-1.3039269955,2.8040812548,0.\N,-0.58873193,1.6343586956,0.\C,3.4101802017,4.2053911245,0.\C,2.786702182,2.9775916537,0.\C,1.3760153315,2.9216345242,0.\C,0.5828209529,4.1107947248,0.\C,1.2483024513,5.3506691592,0.\C,2.6294575733,5.3797020905,0.\C,1.4714368756,0.5295335221,0.\C,2.8734348738,0.6415082355,0.\C,3.6558945074,-0.5110533659,0.\C,3.0447004533,-1.7493355491,0.\C,1.6308747698,-1.8822471755,0.\C,0.8526173287,-0.7202192208,0.\C,-2.7641509385,2.6627856058,0.

\C,-3.3749375249,1.3973938808,0.\C,-4.7597480753,1.2928554286,0.\C,-5.5486613279,2.4432774645,0.\C,-4.948590902,3.7036976416,0.\C,-3.5654411745,3.8169780818,0.\O,3.5218192339,1.8364667358,0.\H,0.6535313171,6.2550072594,0.\H,4.734228042,-0.4078875334,0.\H,-0.2255815773,-0.7791814248,0.\H,-2.7649415026,0.5034249398,0.\H,-5.2253410388,0.3136335776,0.\H,-5.5615178231,4.5980913763,0.\H,-3.0916789712,4.7903210507,0.\H,3.1416504041,6.3354583216,0.\H,4.4923366755,4.2498111951,0.\H,3.6517158339,-2.6468095334,0.\H,-6.6300662135,2.35822805,0.\C,1.0386976263,-3.1662708599,0.\C,0.5581754991,-4.2822485808,0.\C,0.0007110649,-5.5882246686,0.\C,-1.3952810352,-5.7668873263,0.\C,0.842285055,-6.7165090302,0.\C,-1.9325025687,-7.047192415,0.\C,0.2944637542,-7.9922933797,0.\C,-1.0909367613,-8.1605196321,0.\H,-2.0421976468,-4.8970171307,0.\H,1.9173710564,-6.5778961539,0.\H,-3.0089459916,-7.1791202348,0.\H,0.9476747322,-8.8579712494,0.\H,-1.514563799,-9.1590296673,0.\\Version=ES64L-G09RevD.01\State=1-A'\HF=-1277.7477752\RMSD=1.394e-09\RMSF=1.860e-06\Dipole=1.2035483,1.6584158,0.\Quadrupole=7.8186796,37.8014973,-45.6201769,7.7419546,0.,0.\PG=CS [SG(C27H16N3O1)]\

No imaginary frequencies.

### 1u<sup>+</sup> (X=NHCOCF<sub>3</sub>)

1\1\GINC-LOCALHOST\FOpt\RB3LYP\6-31G(2d,p)\C21H12F3N4O2(1+)\PIOTR\13-May-2021\0\#P B3LYP/6-31G(2d,p) FOpt=tight freq(noraman) SCF=Direct #P  
Geom=(NoDistance,NoAngle) fcheck\\Parent flat C(8)-O-Ph(N1)-10-NHCOCF  
3 2nd orient benzotrazinyl, C1\1,1\N,-1.3378654687,-0.7927629844,-0.0038992592\N,-3.9151048507,0.0579534443,0.0078002655\C,-2.8810488094,0.889951279,-0.0015078129\N,-1.5690746051,0.489435871,-0.0071467036\C,-3.0533976022,-4.0263677262,0.0160353476\C,-2.0203679856,-3.1167908166,0.006866324\C,-2.321280396,-1.7362687374,0.0044072138\C,-3.6722379333,-1.2657853805,0.0109444587\C,-4.7059371082,-2.220806786,0.0204336896\C,-4.3867807097,-3.5644244888,0.0228142992\C,0.0146507837,-1.2301191499,-0.008742816\C,0.2610715318,-2.6119604723,-0.0066281994\C,1.5752941786,-3.069140604,-0.0114479436\C,2.6277401315,-2.171958096,-0.0173276506\C,2.3810265153,-0.7788800409,-0.0181682135\C,1.0680343221,-0.3159597274,-0.0144778356\C,-3.1129138927,2.3375788204,-0.0061784592\C,-2.0435399822,3.2492636058,-0.0201468938\C,-2.2926017836,4.6152437049,-0.0246359332\C,-3.6054592534,5.0871526574,-0.0151157744\C,-4.6729237251,4.187707094,-0.0011999736\C,-4.4324214548,2.8209297231,0.0031932695\O,-0.7318426042,-3.5426063056,0.0001270215\H,1.753810644,-4.1376837631,-0.010245881\H,0.8410457248,0.7415890179,-0.0149196696\H,-1.0240938296,2.886053767,-0.0278220443\H,-1.4635746535,5.3139610613,-0.0356077519\H,-5.693248629,4.5542418286,0.0061971169\H,-5.2543907377,2.1166745776,0.0138968072\H,-5.1830858108,-4.3004189229,0.0301175286\H,-2.8263670629,-5.0854276411,0.0179714497\H,3.6487627558,-2.5246239789,-0.021056811\H,-3.7965915212,6.1548617042,-0.0185998329\H,-5.7305800477,-1.87200915,0.0255407586\N,3.4103093384,0.165367772,-0.0208258169\H,3.1407748312,1.139404465,-0.0242662275\C,4.7642071911,-0.0701559419,-0.0201789472\O,5.3086872875,-1.1466181358,-0.0270151718\C,5.612997584,1.2293128528,0.0040308846\F,6.4503679496,1.2398229331,-1.0239328349\F,4.8322615575,2.3336397113,-0.0707827105\F,6.3053391305,1.2883929592,1.1364797335\\Version=ES64L-G09RevD.01\State=1-A'\HF=-1476.2583512\RMSD=2.044e-09\RMSF=2.742e-06\Dipole=-3.3183364,-1.1806603,-0.0037685\Quadrupole=8.374713,19.3395271,-27.7142401,6.4252451,-0.231846,-0.1976576\PG=C01 [X(C21H12F3N4O2)]\

No imaginary frequencies.

### 1v<sup>+</sup> (X=NHCOOMe)

1\1\GINC-LOCALHOST\FOpt\RB3LYP\6-31G(2d,p)\C21H15N4O3(1+)\PIOTR\13-May



-2021\0\#\#P B3LYP/6-31G(2d,p) FOpt=tight freq(noraman) SCF=Direct #P Geom=(NoDistance,NoAngle) fcheck\Parent flat C(8)-O-Ph(N1)-10-NHCOOMe 2nd orient benzotrazinyl cat, C1\1,1\N,-0.7580464186,-0.8795713628,-0.0000012084\N,-3.1696559097,0.3709699279,0.0000111706\C,-2.0168142884,1.0256731194,0.0000049415\N,-0.7841502932,0.424048557,-0.0000011721\C,-2.9672772713,-3.8004804121,0.0000068447\C,-1.8022000648,-3.0650969421,0.0000017701\C,-1.8804317762,-1.6544741908,0.0000037169\C,-3.1393923192,-0.9763024072,0.0000107577\C,-4.3103494322,-1.7549038895,0.0000162032\C,-4.2088221318,-3.1332629139,0.0000141644\C,0.5070984055,-1.5231638749,-0.0000074007\C,0.5299272266,-2.9267433024,-0.0000094315\C,1.7562303993,-3.5848795359,-0.0000159991\C,2.9361653407,-2.8657492547,-0.0000197051\C,2.9189410649,-1.4478263042,-0.0000167393\C,1.6915193114,-0.786399853,-0.000011026\C,-2.0150668066,2.4930670463,0.0000005505\C,-0.8137243302,3.2213819041,-0.0000108585\C,-0.8403006288,4.6097663884,-0.0000172679\C,-2.0602831806,5.2862761957,-0.0000122226\C,-3.2580352279,4.5694602683,-0.0000004914\C,-3.2397993775,3.1816731388,0.0000058508\O,-0.5987120081,-3.6886439682,-0.0000053742\H,1.7642918338,-4.668260514,-0.0000179497\H,1.6334188124,0.2934045156,-0.0000088841\H,0.1337709581,2.6984594734,-0.0000153575\H,0.090236935,5.1663730461,-0.0000265549\H,-4.206546085,5.0947275343,0.0000033663\H,-4.16393837,2.6178919189,0.0000144493\H,-5.1123712492,-3.7328397722,0.000018119\H,-2.9102266026,-4.8820425515,0.0000051637\H,3.8899956523,-3.3732685858,-0.0000245717\H,-2.0779001542,6.3708505748,-0.0000175682\H,-5.2668947515,-1.2484219173,0.0000215563\N,4.0773892871,-0.6866949534,-0.0000189745\H,3.9773953782,0.3180226637,-0.000016394\C,5.3918962512,-1.1404974319,-0.0000228654\O,5.7392496228,-2.2963999861,-0.0000277292\O,6.2007429006,-0.0743083692,-0.0000237356\C,7.6110884961,-0.3774195356,-0.0000293538\H,7.8738465181,-0.9492646851,0.8915281121\H,7.8738428151,-0.9492483161,-0.8915985504\H,8.1115060083,0.5892009274,-0.0000217607\Version=ES64L-G09RevD.01\State=1-A\HF=-1253.7809266\RMSD=3.142e-09\RMSF=1.765e-06\Dipole=-0.8778451,-0.284044,0.000003\Quadrupole=26.2451958,7.7578317,-34.0030275,8.2512311,-0.0002042,-0.000098\PG=C01 [X(C21H15N4O3)]\@

No imaginary frequencies.

## 9. References

- 1 L. Hunter, R. S. Barnes, *J. Chem. Soc.*, 1928, 2058-2067
- 2 T. Okitsu, M. Ogasahara, A. Wada, *Chem. Pharm. Bull.*, 2016, **64**, 1149-1153.
- 3 K. Shibuya, K. Kawamine, T. Miura, C. Ozaki, T. Edano, K. Mizuno, Y. Yoshinaka, Y. Tsunenari, *Bioorg. Med. Chem.*, 2018, **26**, 4001-4013.
- 4 A. H. J. Schoustinssen, *J. Am. Chem Soc.*, 1933, **55**, 4545-4546.
- 5 G. W. Muller, F. Payvandi, L. H. Zhang, M. J. Robarge, R. Chen, H.-W. Man, A. L. Ruchelman US, 2005; Vol. US20050107339A1.
- 6 R. Crossley, Z. Goolamali, P. G. Sammes, *J. Chem. Soc., Perkin Trans. 2*, 1994, 1615-1623.
- 7 D. Pendin, R. Norante, A. De Nadai, G. Gherardi, N. Vajente, E. Basso, N. Kaludercic, C. Mammucari, C. Paradisi, T. Pozzan, A. Mattarei, *Angew. Chem. Int. Ed.*, 2019, **58**, 9917-9922.

- 8 F. Kehrman, W. Klopfenstein, *Helv. Chim. Acta*, 1923, **6**, 952-954.
- 9 G. A. Smith, J. C. Metcalfe, S. D. Clarke, *J. Chem. Soc., Perkin Trans. 2*, 1993, 1195-1204.
- 10 T. W. Doyle, *Can. J. Chem.*, 1977, **55**, 2714-2718.
- 11 CrysAlis PRO. Agilent Technologies Ltd, Yarnton, Oxfordshire, England, 2014.
- 12 G. M. Sheldrick, *Acta Cryst., Sect. A*, 2015, **A71**, 3-8.
- 13 G. M. Sheldrick, *Acta Cryst., Sect. C*, 2015, **C71**, 3-8.
- 14 P. Kaszynski, C. P. Constantinides, V. G. Young, Jr., *Angew. Chem. Int. Ed.*, 2016, **55**, 11149–11152.
- 15 P. Bartos, B. Anand, A. Pietrzak, P. Kaszyński, *Org. Lett.*, 2020, **22**, 180-184.
- 16 A. A. Hande, C. Darrigan, P. Bartos, P. Baylère, A. Pietrzak, P. Kaszyński, A. Chrostowska, *Phys. Chem. Chem. Phys.*, 2020, **22**, 23637-23644.
- 17 N. G. Connelly, W. E. Geiger, *Chem. Rev.*, 1996, **96**, 877–910.
- 18 Gaussian 09, Revision A.02, M. J. Frisch, G. W. Trucks, H. B. Schlegel, G. E. Scuseria, M. A. Robb, J. R. Cheeseman, G. Scalmani, V. Barone, B. Mennucci, G. A. Petersson, H. Nakatsuji, M. Caricato, X. Li, H. P. Hratchian, A. F. Izmaylov, J. Bloino, G. Zheng, J. L. Sonnenberg, M. Hada, M. Ehara, K. Toyota, R. Fukuda, J. Hasegawa, M. Ishida, T. Nakajima, Y. Honda, O. Kitao, H. Nakai, T. Vreven, J. A. Montgomery, Jr., J. E. Peralta, F. Ogliaro, M. Bearpark, J. J. Heyd, E. Brothers, K. N. Kudin, V. N. Staroverov, R. Kobayashi, J. Normand, K. Raghavachari, A. Rendell, J. C. Burant, S. S. Iyengar, J. Tomasi, M. Cossi, N. Rega, J. M. Millam, M. Klene, J. E. Knox, J. B. Cross, V. Bakken, C. Adamo, J. Jaramillo, R. Gomperts, R. E. Stratmann, O. Yazyev, A. J. Austin, R. Cammi, C. Pomelli, J. W. Ochterski, R. L. Martin, K. Morokuma, V. G. Zakrzewski, G. A. Voth, P. Salvador, J. J. Dannenberg, S. Dapprich, A. D. Daniels, O. Farkas, J. B. Foresman, J. V. Ortiz, J. Cioslowski, and D. J. Fox, Gaussian, Inc., Wallingford CT, 2009.
- 19 M. Cossi, G. Scalmani, N. Rega, V. Barone, *J. Chem. Phys.*, 2002, **117**, 43-54, and references therein.
- 20 F. De Vleeschouwer, A. Chankisjijev, W. Yang, P. Geerlings, F. De Proft, *J. Org. Chem.*, 2013, **78**, 3151-3158.
- 21 M. Lucarini, P. Pedrielli, G. F. Pedulli, L. Valgimigli, D. Gigmes, P. Tordo, *J. Am. Chem Soc.*, 1999, **121**, 11546-11553.
- 22 S. J. Blanksby, G. B. Ellison, *Acc. Chem. Res.*, 2003, **36**, 255-263, and references therein.

23 S. Trasatti, *Pure Appl. Chem.*, 1986, **58**, 955–966.

24 R. E. Stratmann, G. E. Scuseria, M. J. Frisch, *J. Chem. Phys.*, 1998, **109**, 8218-8224.
